# Supplementary material
Source: publisher figshare collection journal article supplement (https://future-science-group.figshare.com/articles/dataset/_/21378228)

1

File: BO-I-151a

Date Run: 02-21-2019 (Time Run: 16:08:02)

Sample: DR. BABATUNDE /PROF. DR.DR. KHALID

Instrument: JEOL JMS600H-1

Run By: HEJ-104

Ionization mode: EI+

Scan: 15-17

R.T.: 1.33

Base: m/z 296; 55%FS TIC: 7094108

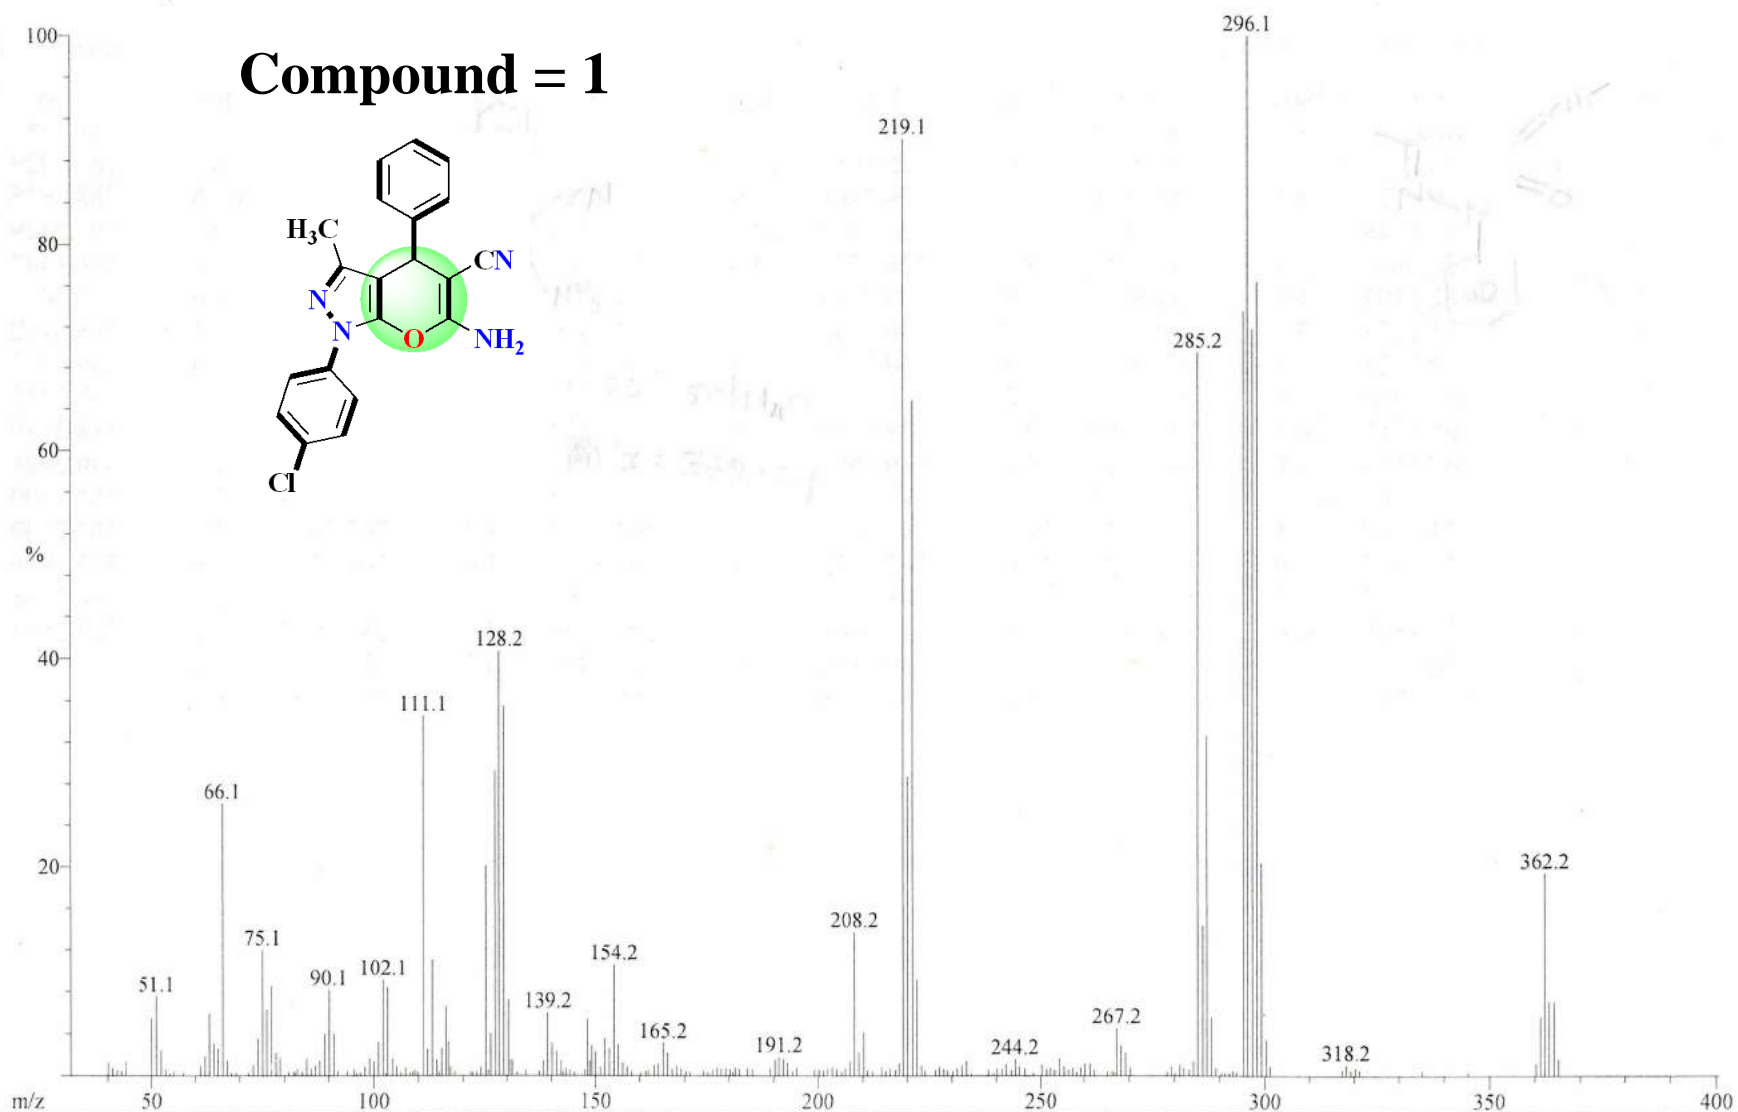

2

File: BO-I-187a

Date Run: 03-30-2019 (Time Run: 12:53:49)

Sample: DR. BABATUNDE /PROF. DR. KHALID

Instrument: JEOL JMS600H-1

Run By: HEJ-104

Ionization mode: EI+

Scan: 20

R.T.: 1.68

Base: m/z 286; 76.6%FS TIC: 6959104

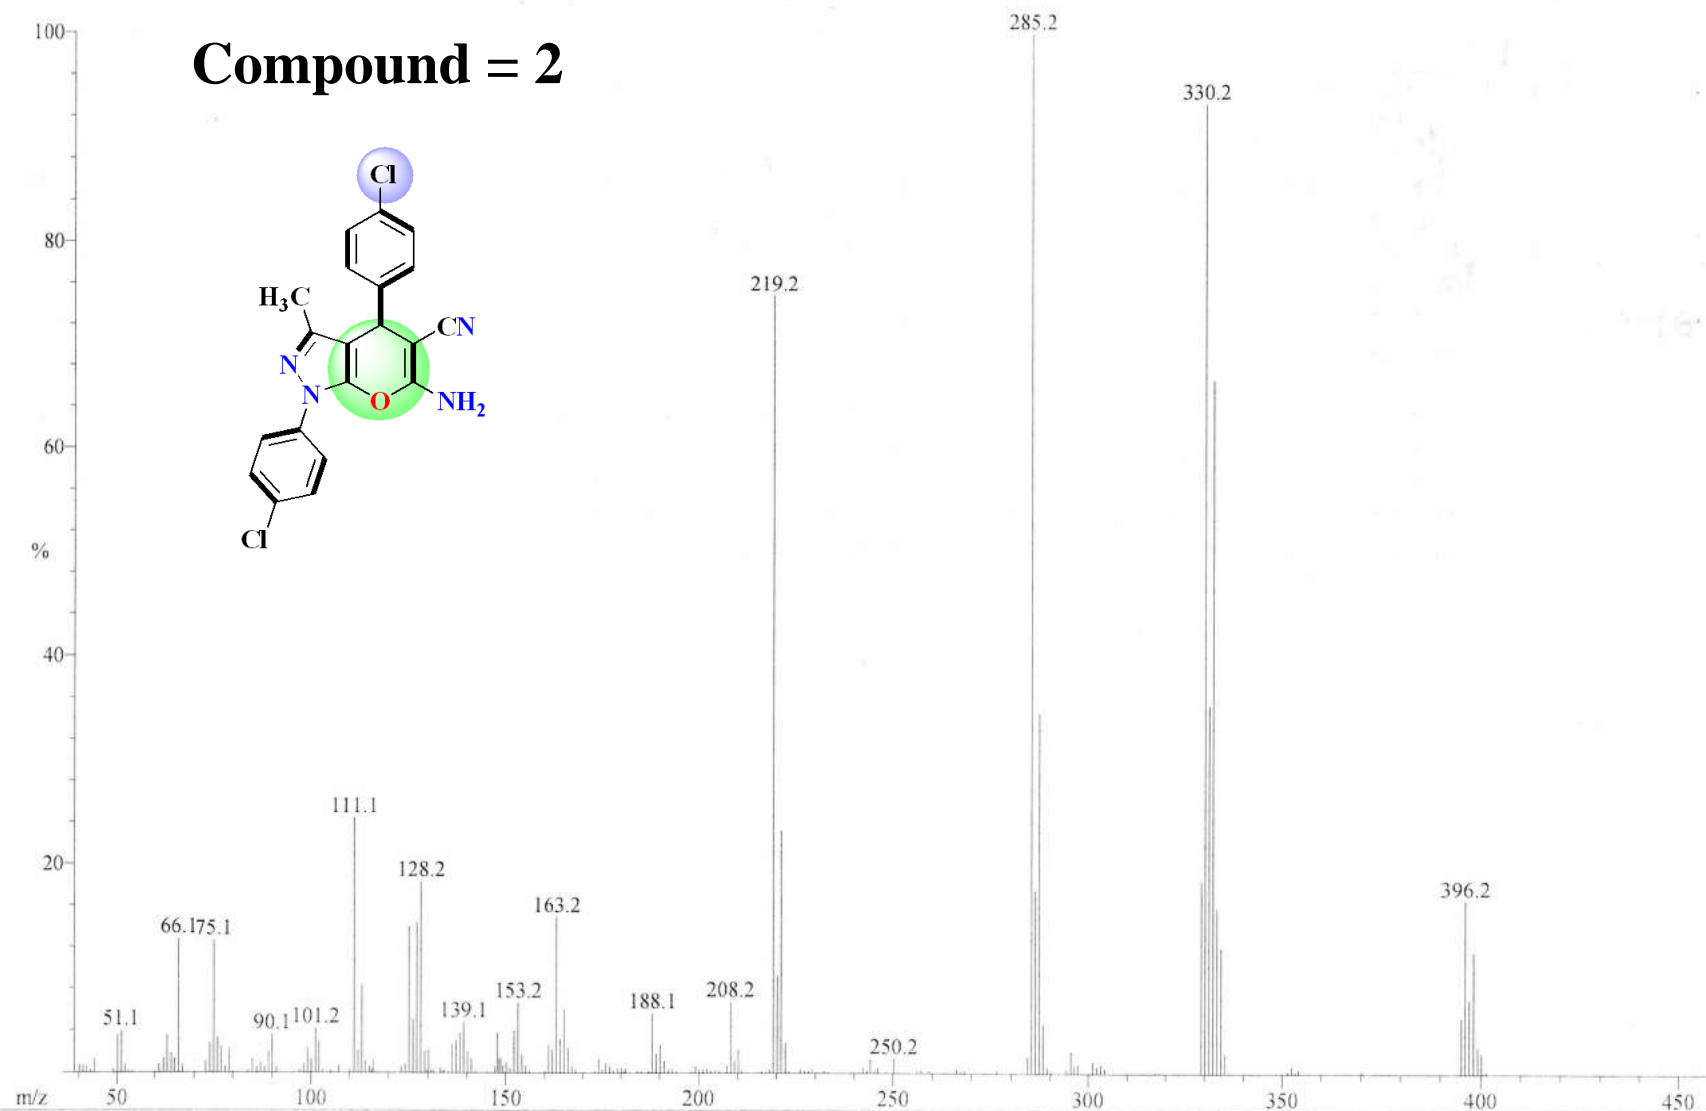

File: BO-II-013a

Date Run: 04-06-2019 (Time Run: 14:44:00)

Sample: DR.O.BABATUNDE /PROF.DR. KHALID

Instrument: JEOL JMS600H-I

Run By: HEJ-104

Ionization mode: EI+

Scan: 17

R.T.: 1.42

Base: m/z 296; 99.8%FS TIC: 4959416

**Compound = 3**

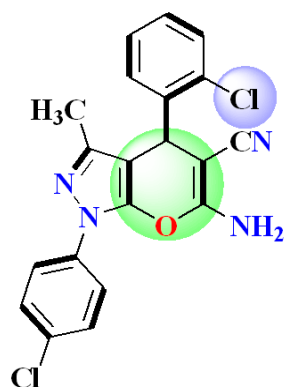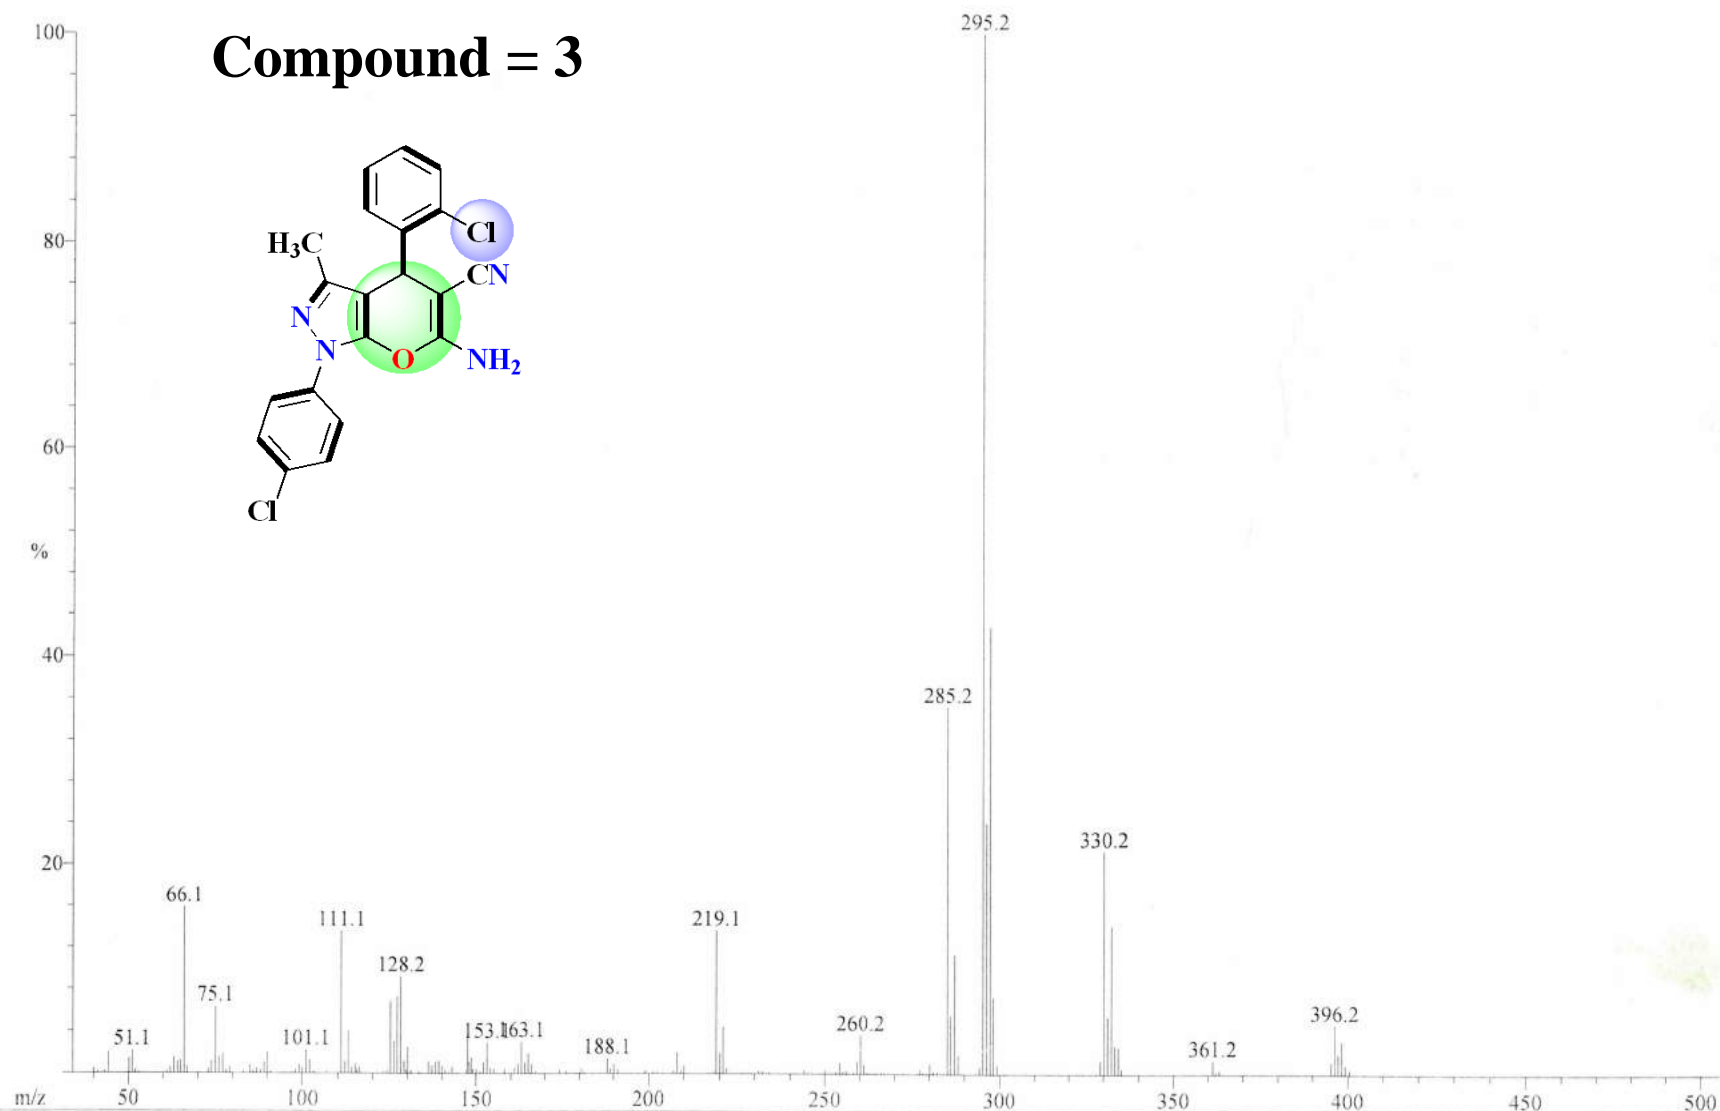

File: BO-I-161A  
Sample: DR. O. BABATUNDE /DR. KHALID  
Instrument: JEOL JMS600H-1  
Inlet: My Inlet

Date Run: 03-06-2019 (Time Run: 13:25:54)

Ionization mode: EI+

Run By: HEJ-104

Scan: 19

Base: m/z 329; 100%FS TIC: 7238784

#Ions: 267

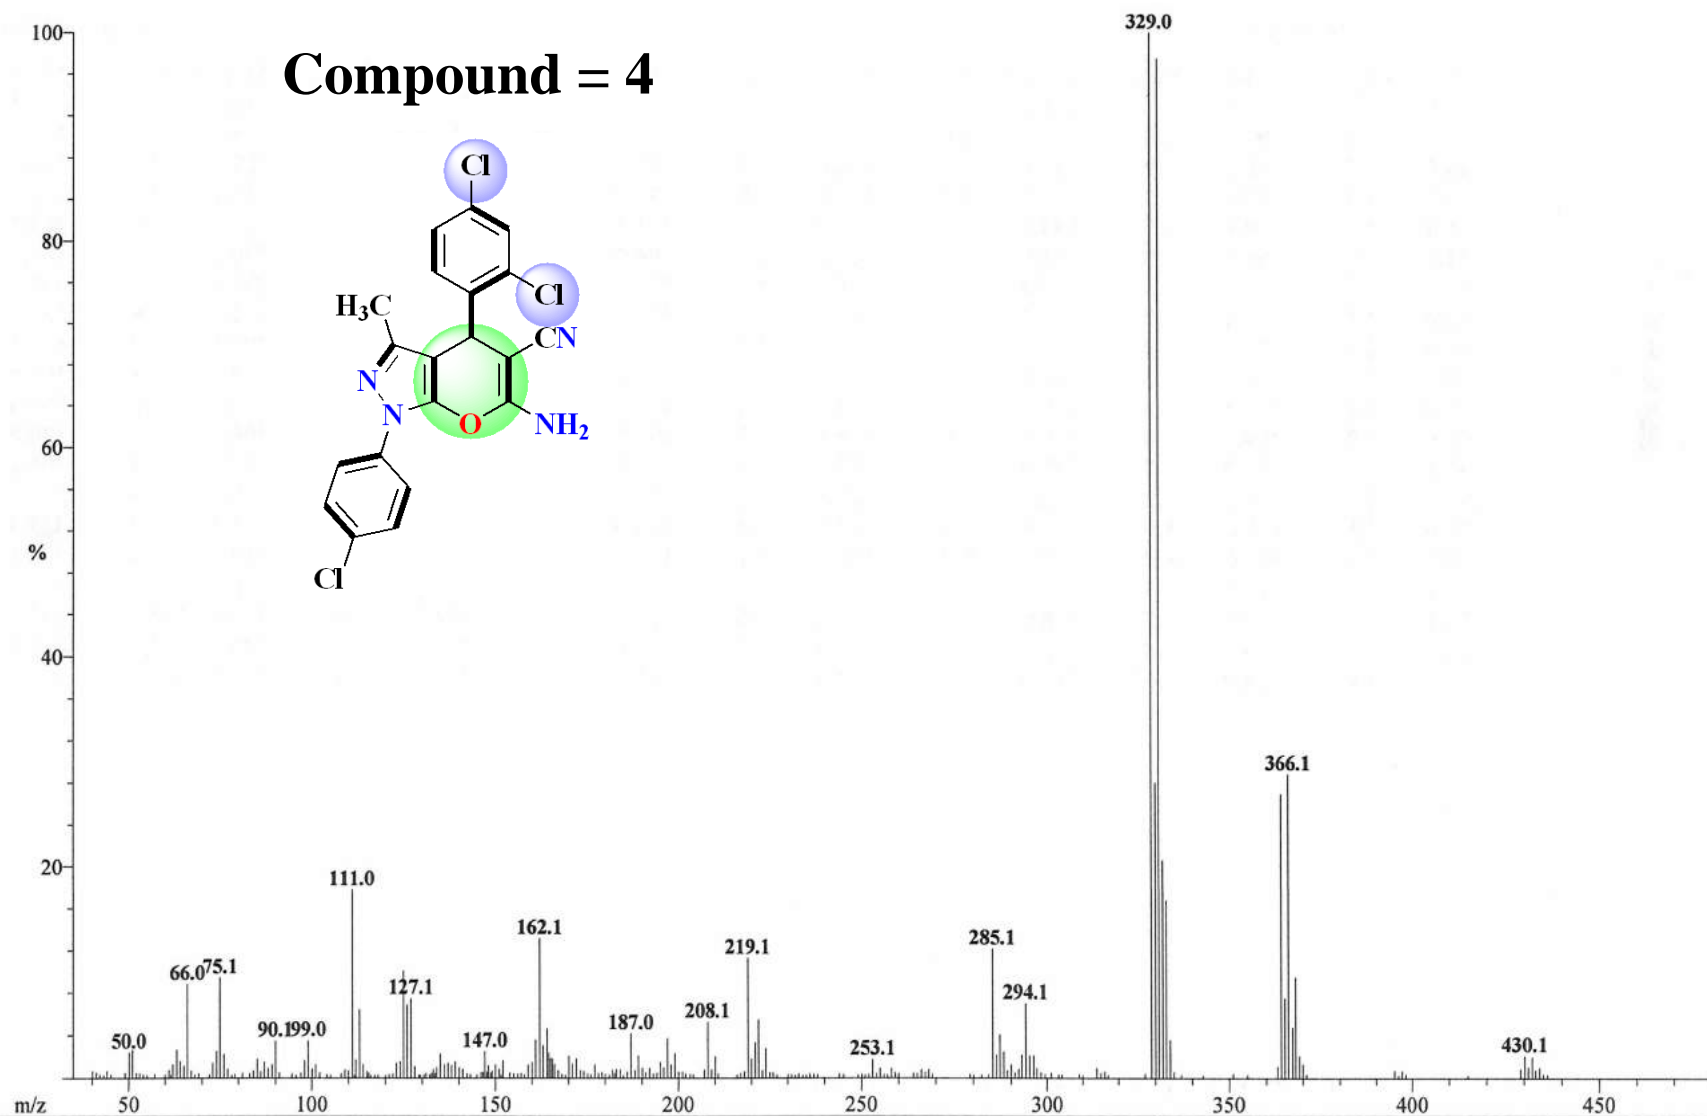

5

File: BO-I-169A

Date Run: 03-08-2019 (Time Run: 12:57:50)

Sample: DR. O. BABATUNDE /DR. KHALID

Instrument: JEOL JMS600H-1

Run By: HEJ-104

Ionization mode: EI+

Scan: 17-18

R.T.: 1.46

Base: m/z 329; 99.5%FS TIC: 9127768

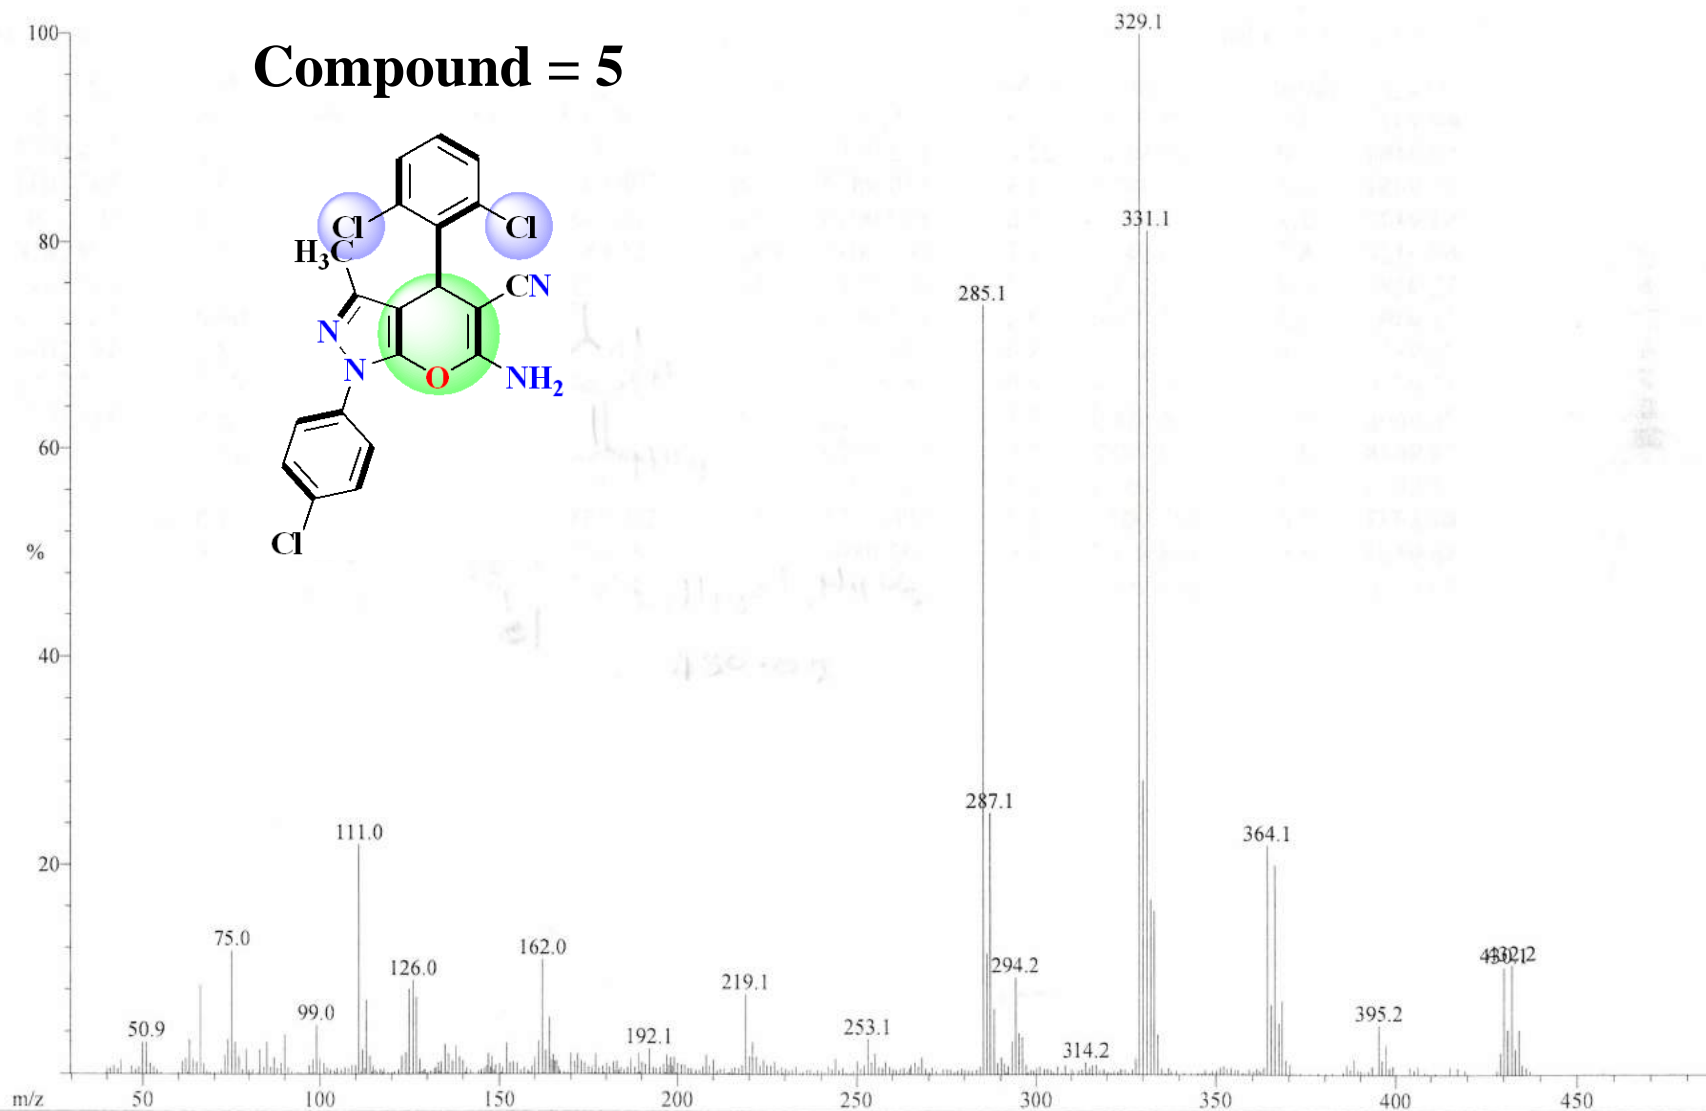

6

File: BO-II-017a

Date Run: 04-06-2019 (Time Run: 14:33:58)

Sample: DR.O.BABATUNDE /PROF.DR. KHALID

Instrument: JEOL JMS600H-1

Run By: HEJ-104

Ionization mode: EI+

Scan: 17-18

R.T.: 1.46

Base: m/z 325; 99.8%FS TIC: 7417713

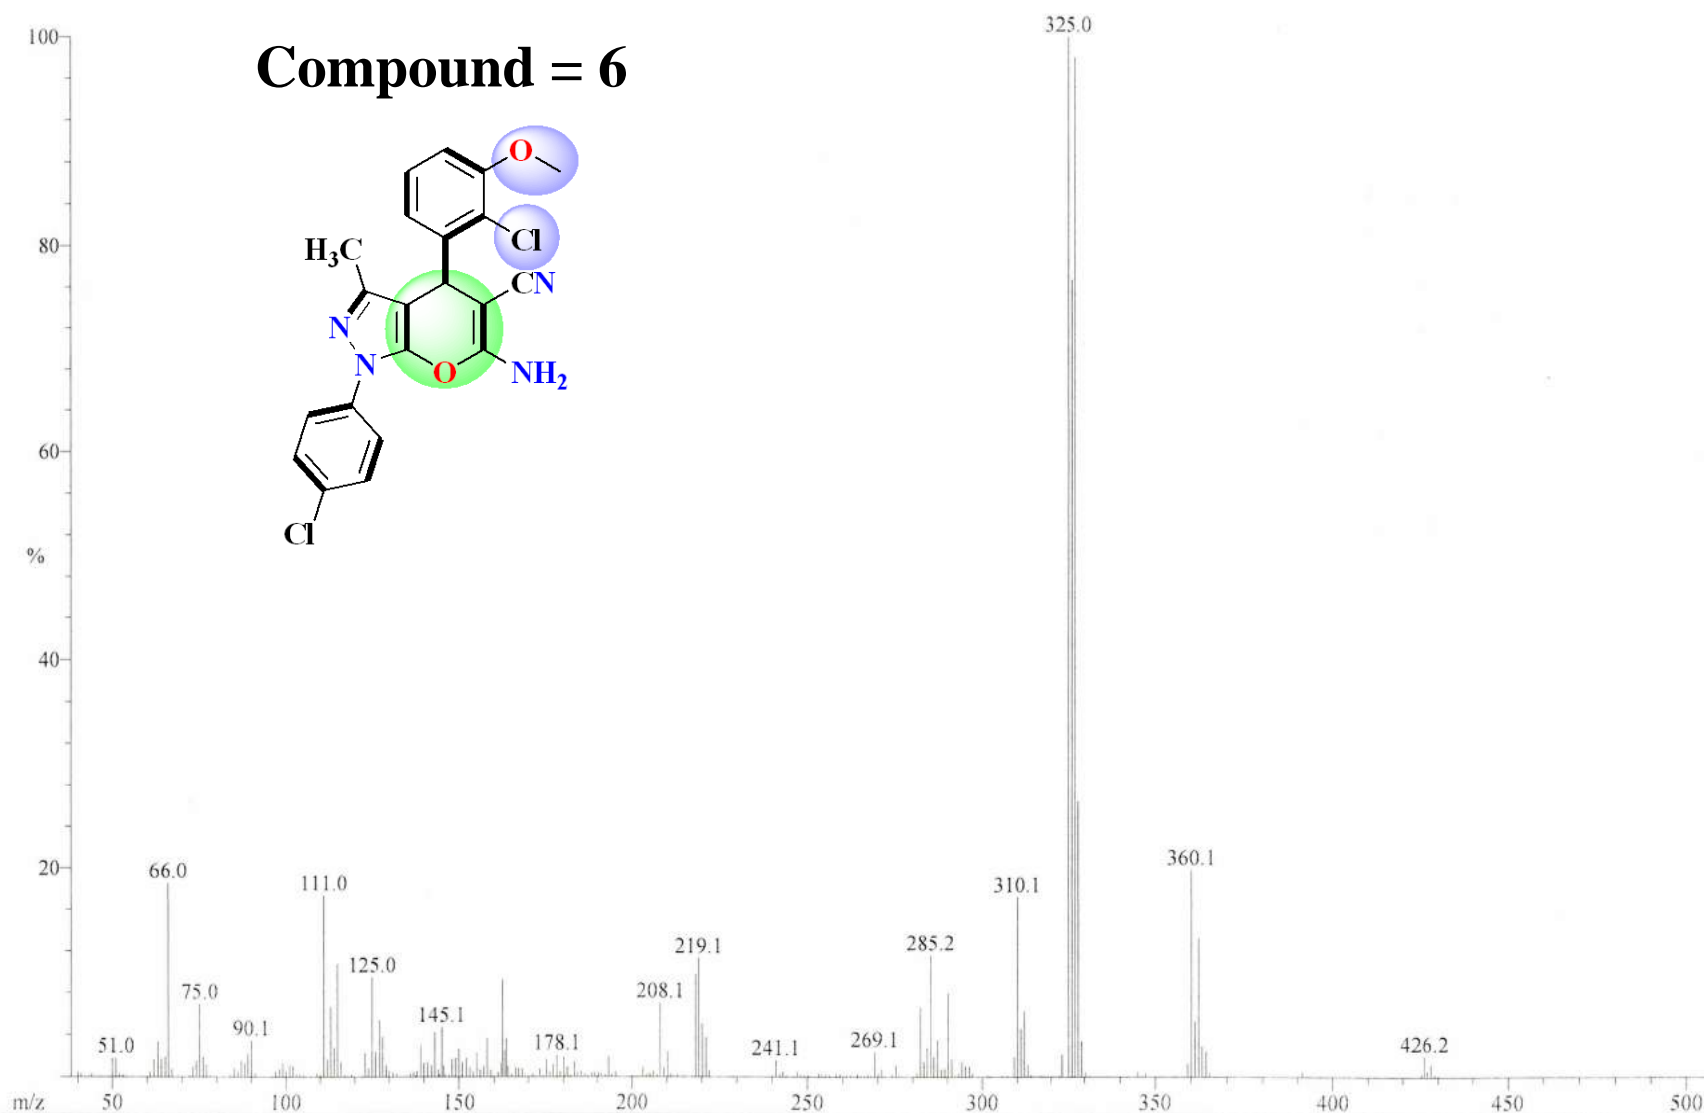

7

File: BO-I-183a

Date Run: 03-18-2019 (Time Run: 14:39:24)

Sample: DR.O. BABATUNDE /PROF. DR. KHALID

Instrument: JEOL JMS600H-1

Run By: HEJ-104

Ionization mode: EI+

Scan: 21-23

R.T.: 1.87

Base: m/z 375; 77%FS TIC: 17978156

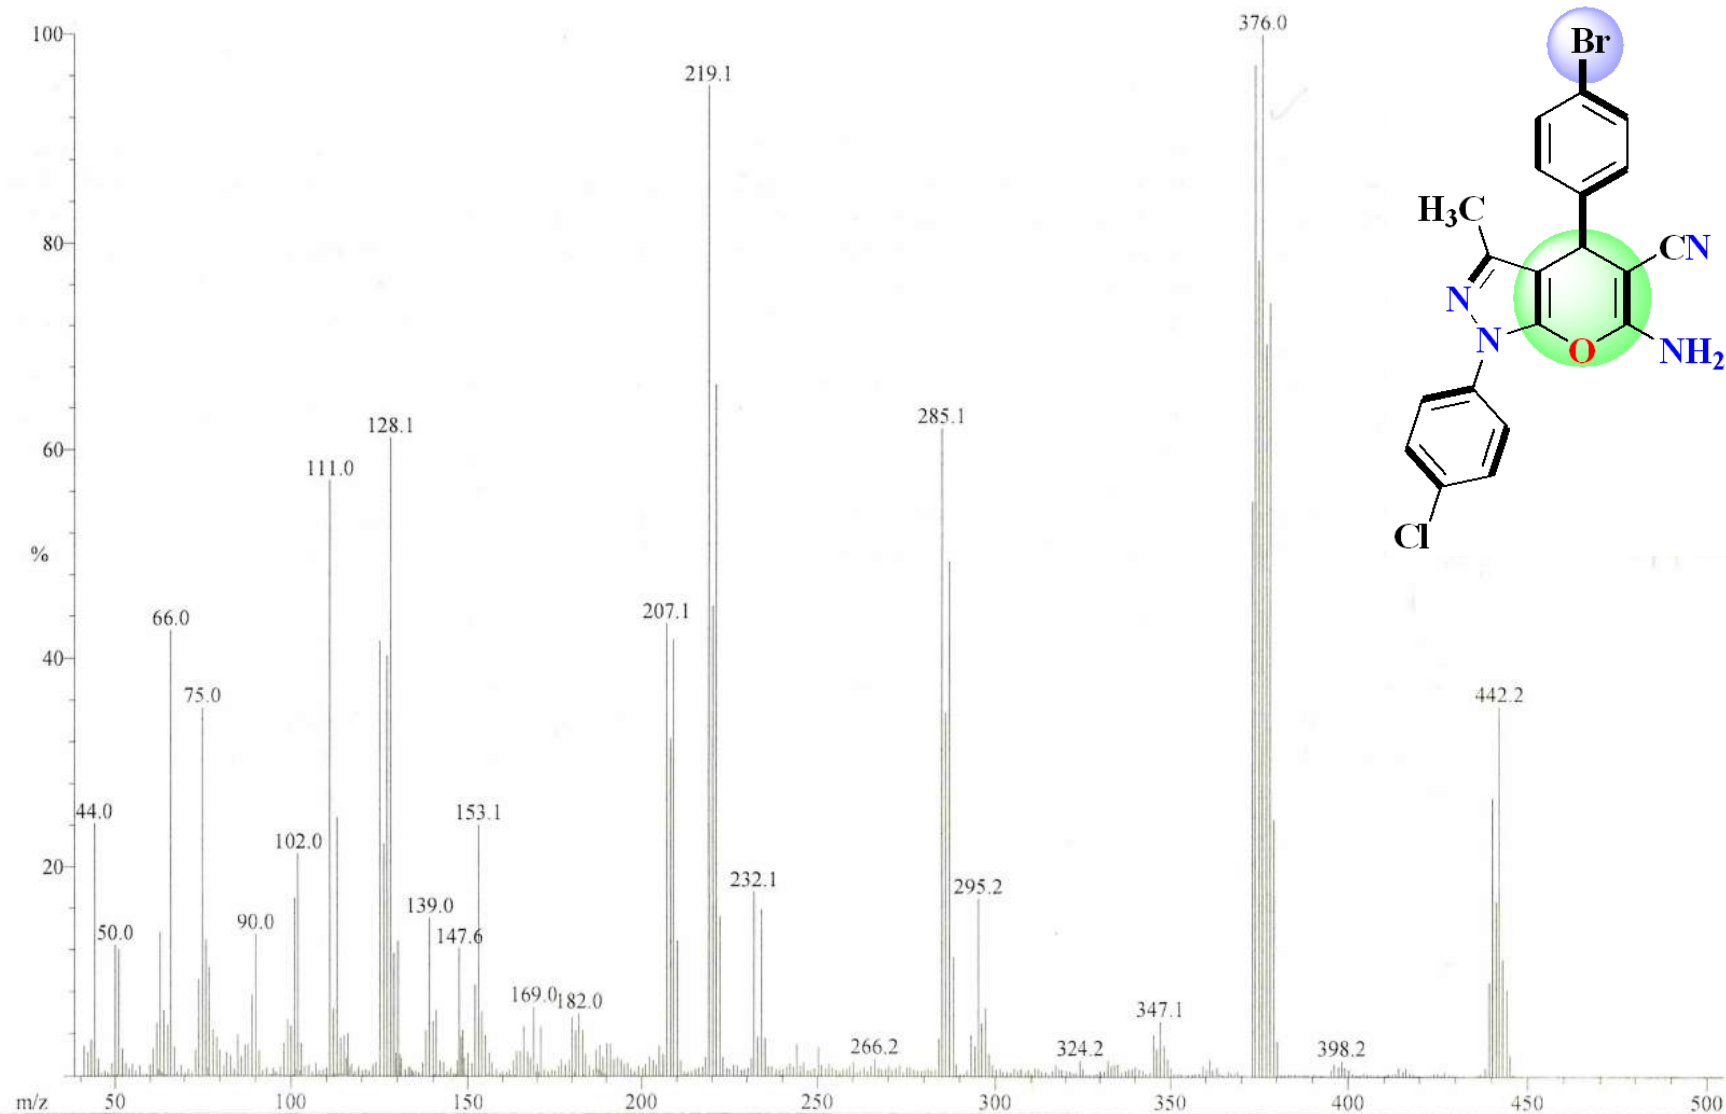

8

File: BO-I-185a

Date Run: 03-18-2019 (Time Run: 14:21:47)

Sample: DR.O. BABATUNDE /PROF. DR. KHALID

Instrument: JEOL JMS600H-1

Run By: HEJ-104

Ionization mode: EI+

Scan: 26

R.T.: 2.22

Base: m/z 395; 99.7%FS TIC: 9567059

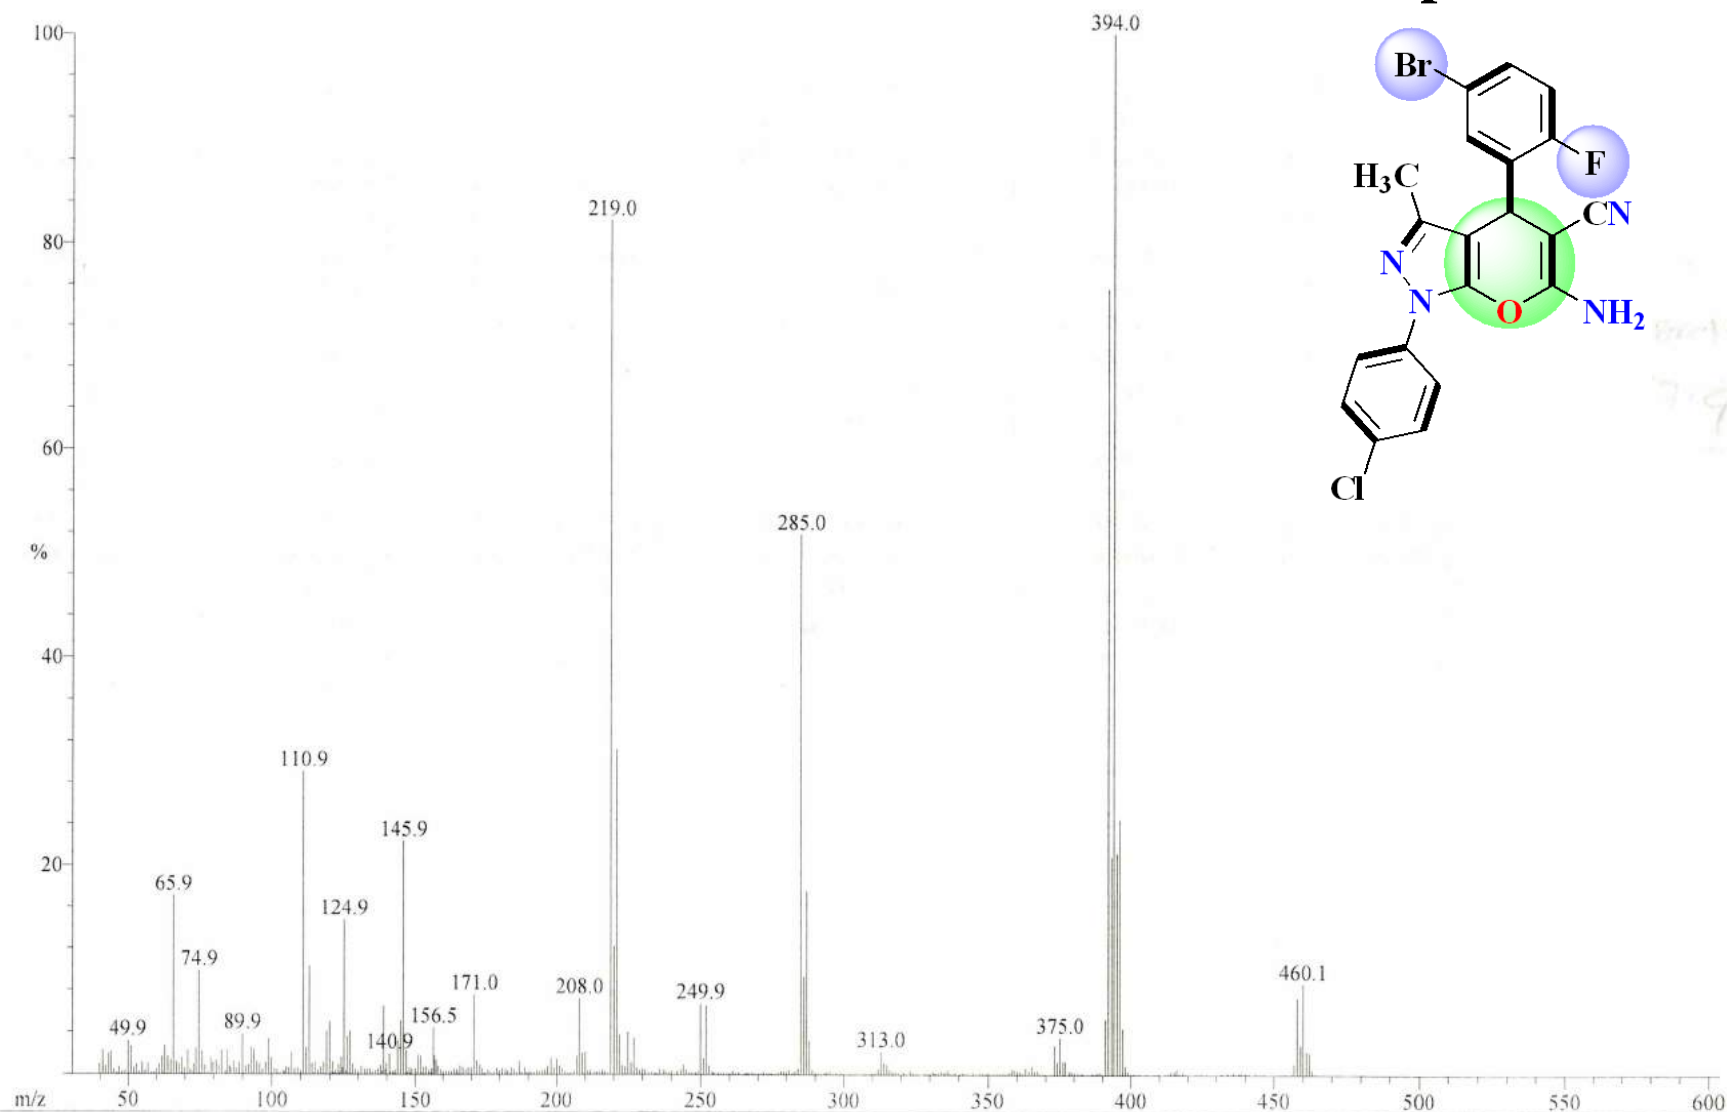



File: BO-II-015a

Date Run: 04-06-2019 (Time Run: 14:56:07)

Sample: DR.O.BABATUNDE /PROF.DR. KHALID

Instrument: JEOL JMS600H-1

Run By: HEJ-104

Ionization mode: EI+

Scan: 13

R.T.: 1.07

Base: m/z 376; 82%FS TIC: 7548183

**Compound = 9**

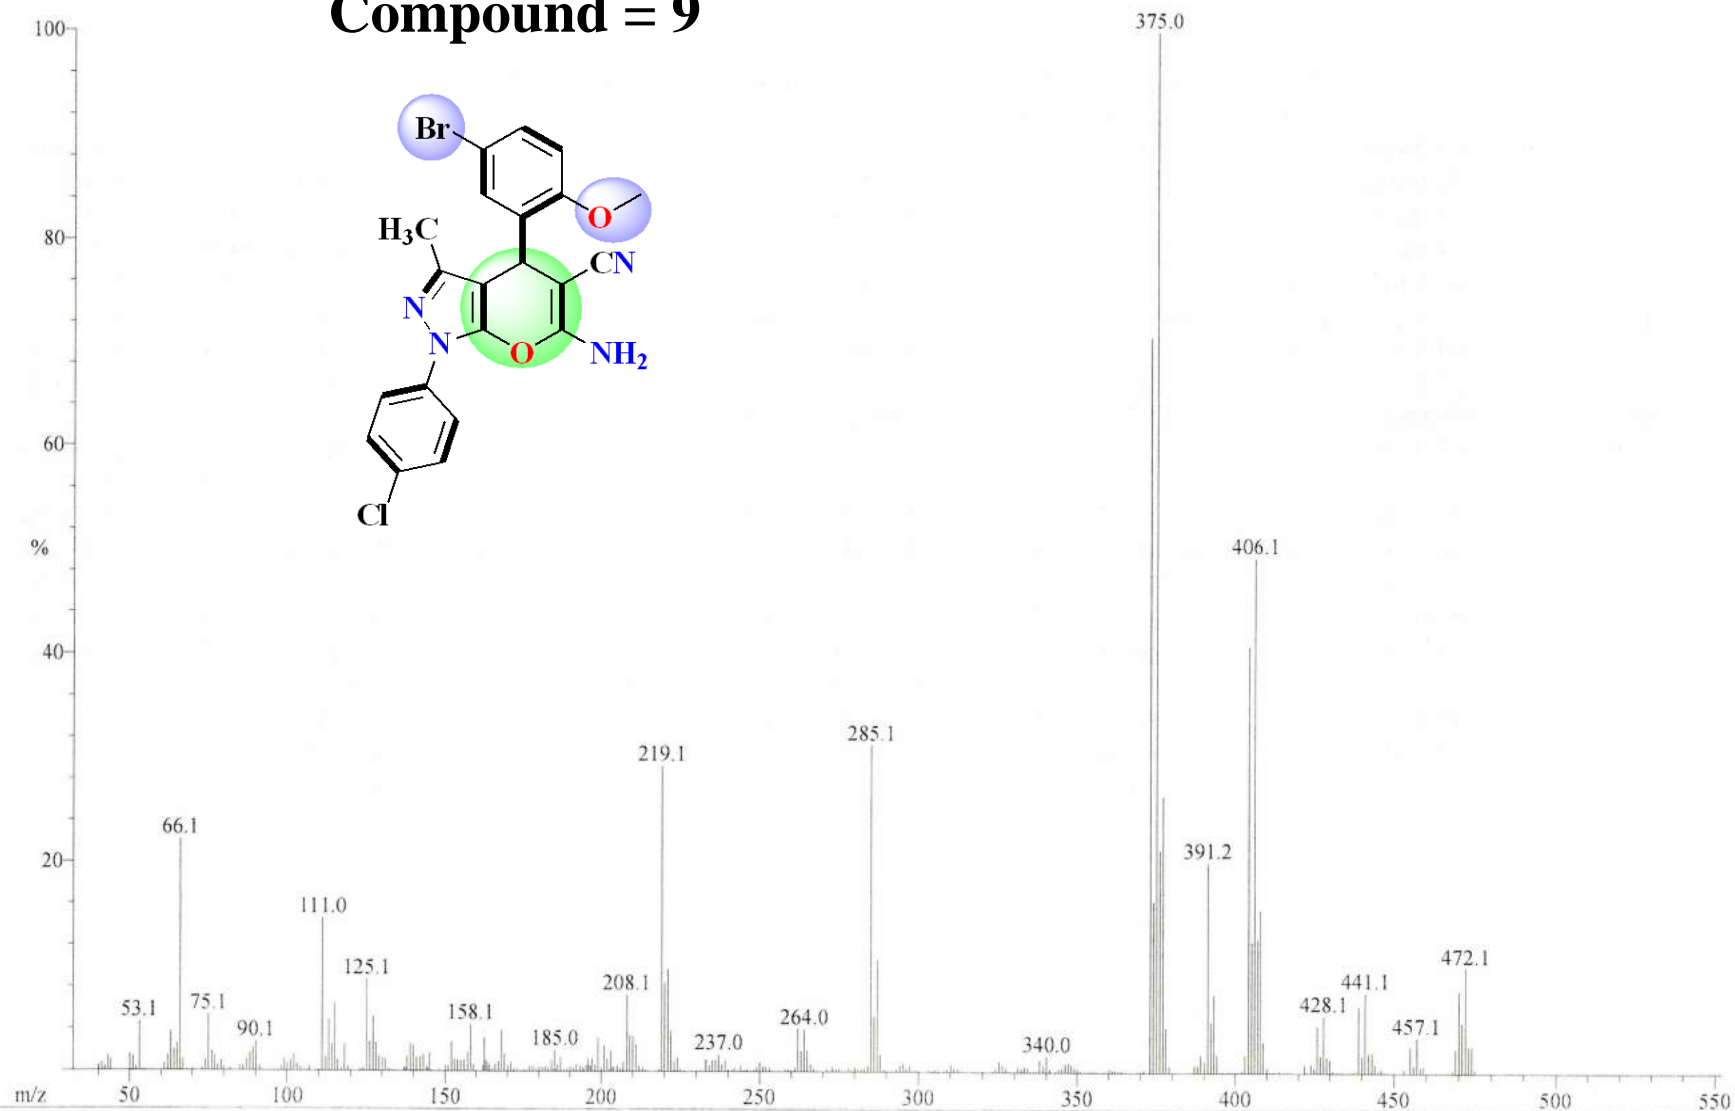

10

File: BO-I-197a

Date Run: 04-05-2019 (Time Run: 16:36:40)

Sample: DR. BABATUNDE /PROF.DR. KHALID

Instrument: JEOL JMS600H-1

Run By: HEJ-104

Ionization mode: EI+

Scan: 12

R.T.: .98

Base: m/z 356; 99.8%FS TIC: 7209249

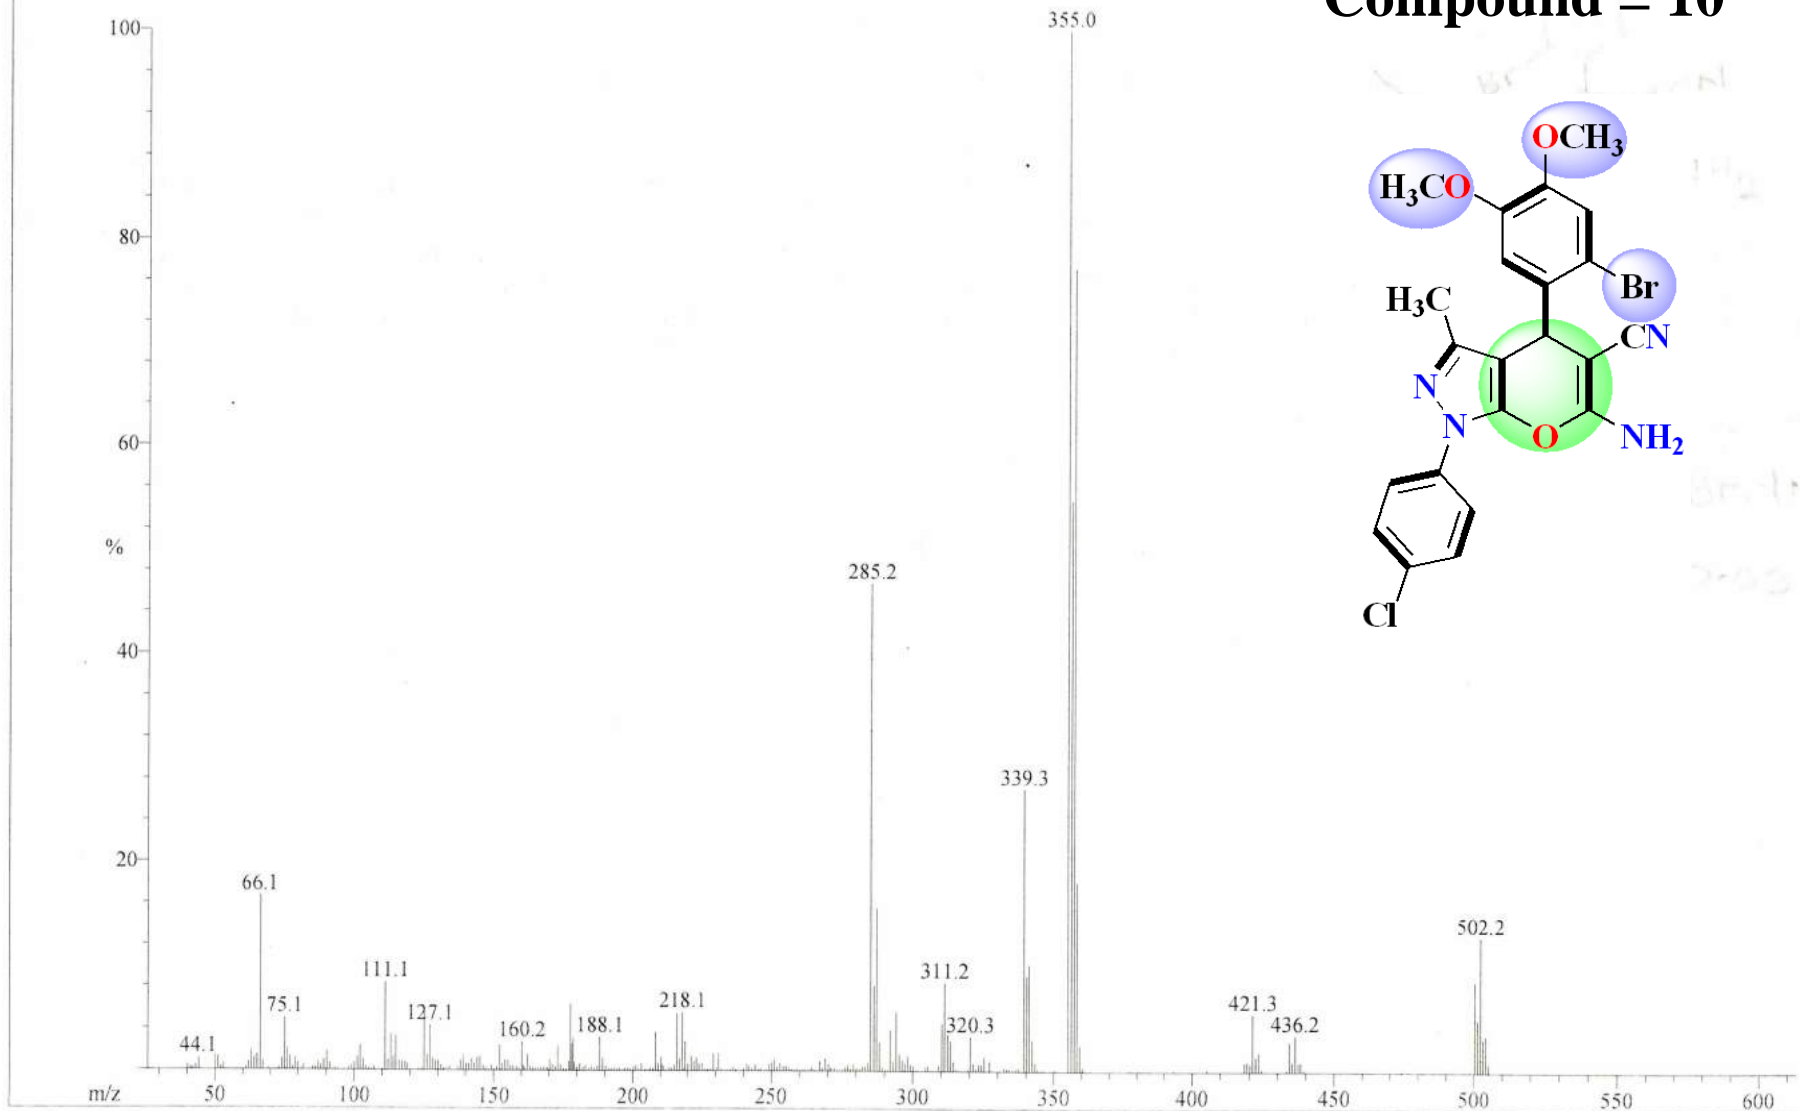

File: BO-II-019a

Date Run: 04-06-2019 (Time Run: 15:20:18)

Sample: DR.O.BABATUNDE /PROF.DR. KHALID

Instrument: JEOL JMS600H-1

Run By: HEJ-104

Ionization mode: EI+

Scan: 12

R.T.: .98

Base: m/z 285; 99.8%FS TIC: 7377000

**Compound = 11**

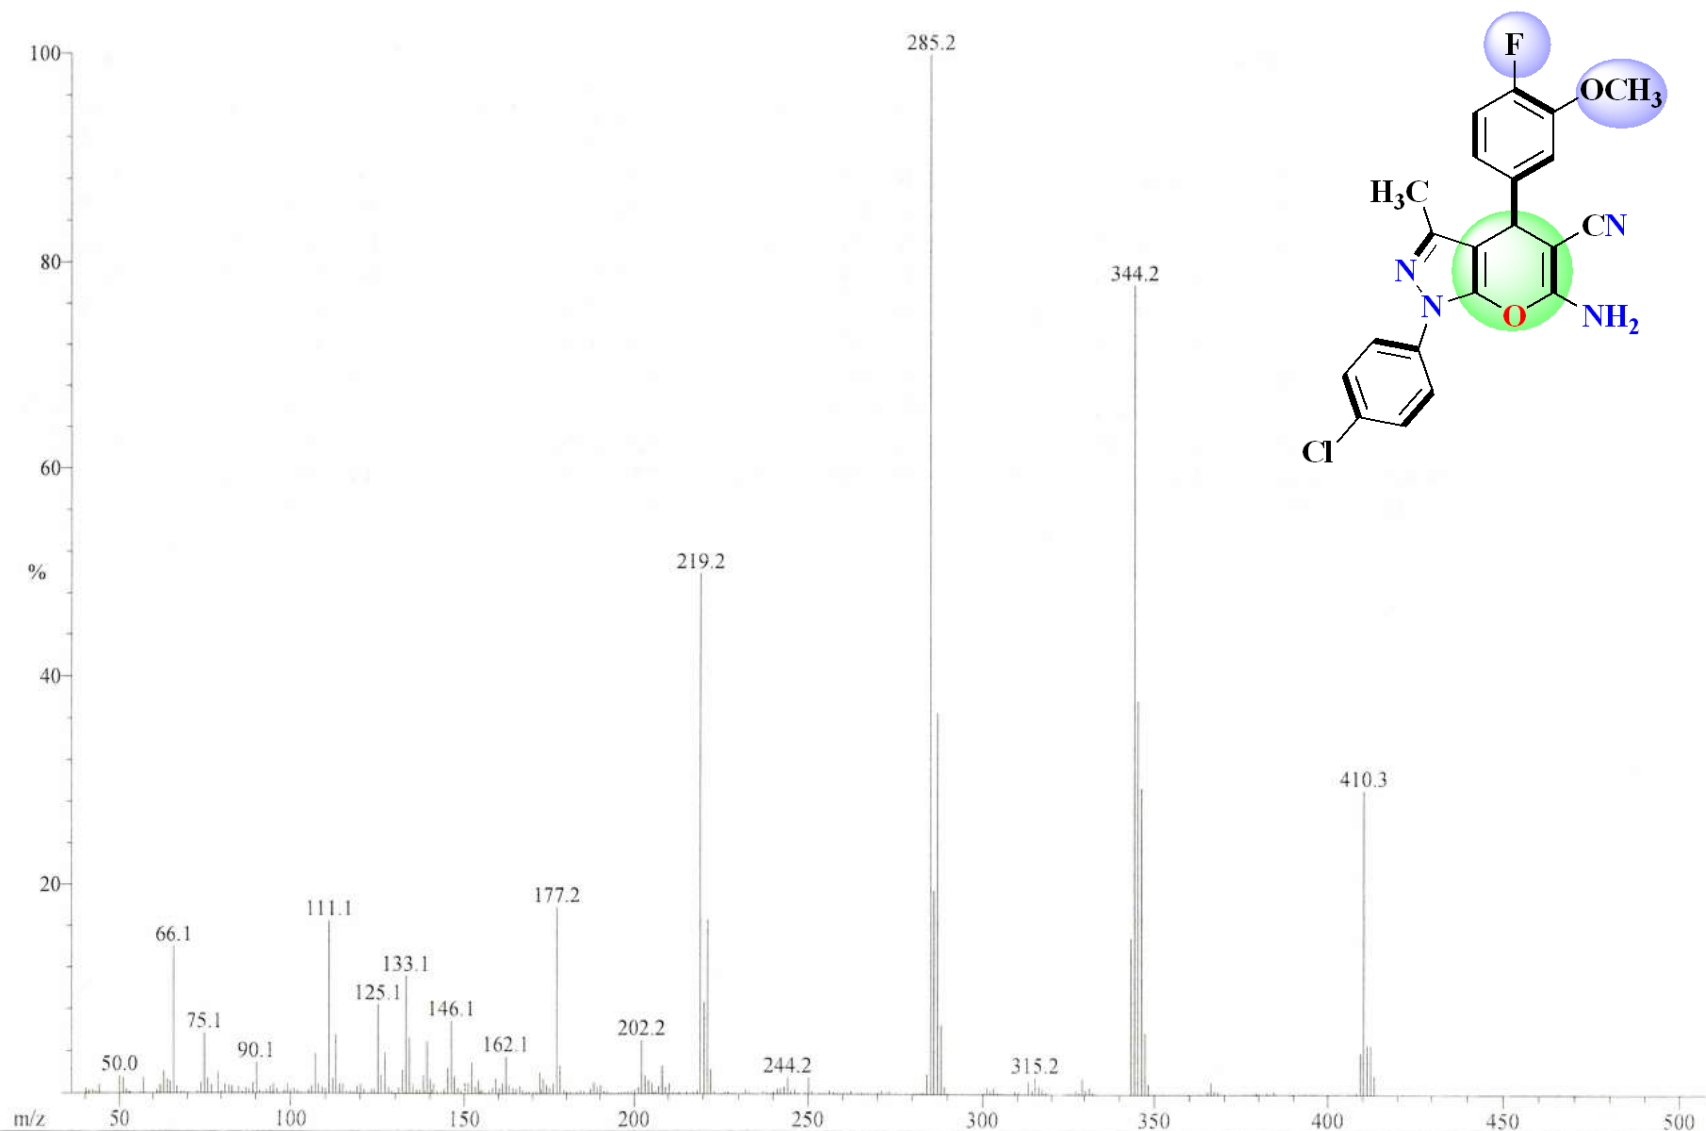

12

File: BO-II-021a

Date Run: 04-08-2019 (Time Run: 12:02:01)

Sample: DR.BABATUNDE /PROF. DR. KHALID

Instrument: JEOL JMS600H-1

Run By: HEJ-104

Ionization mode: EI+

Scan: 25

R.T.: 2.12

Base: m/z 344; 99.8%FS TIC: 9829542

**Compound = 12**

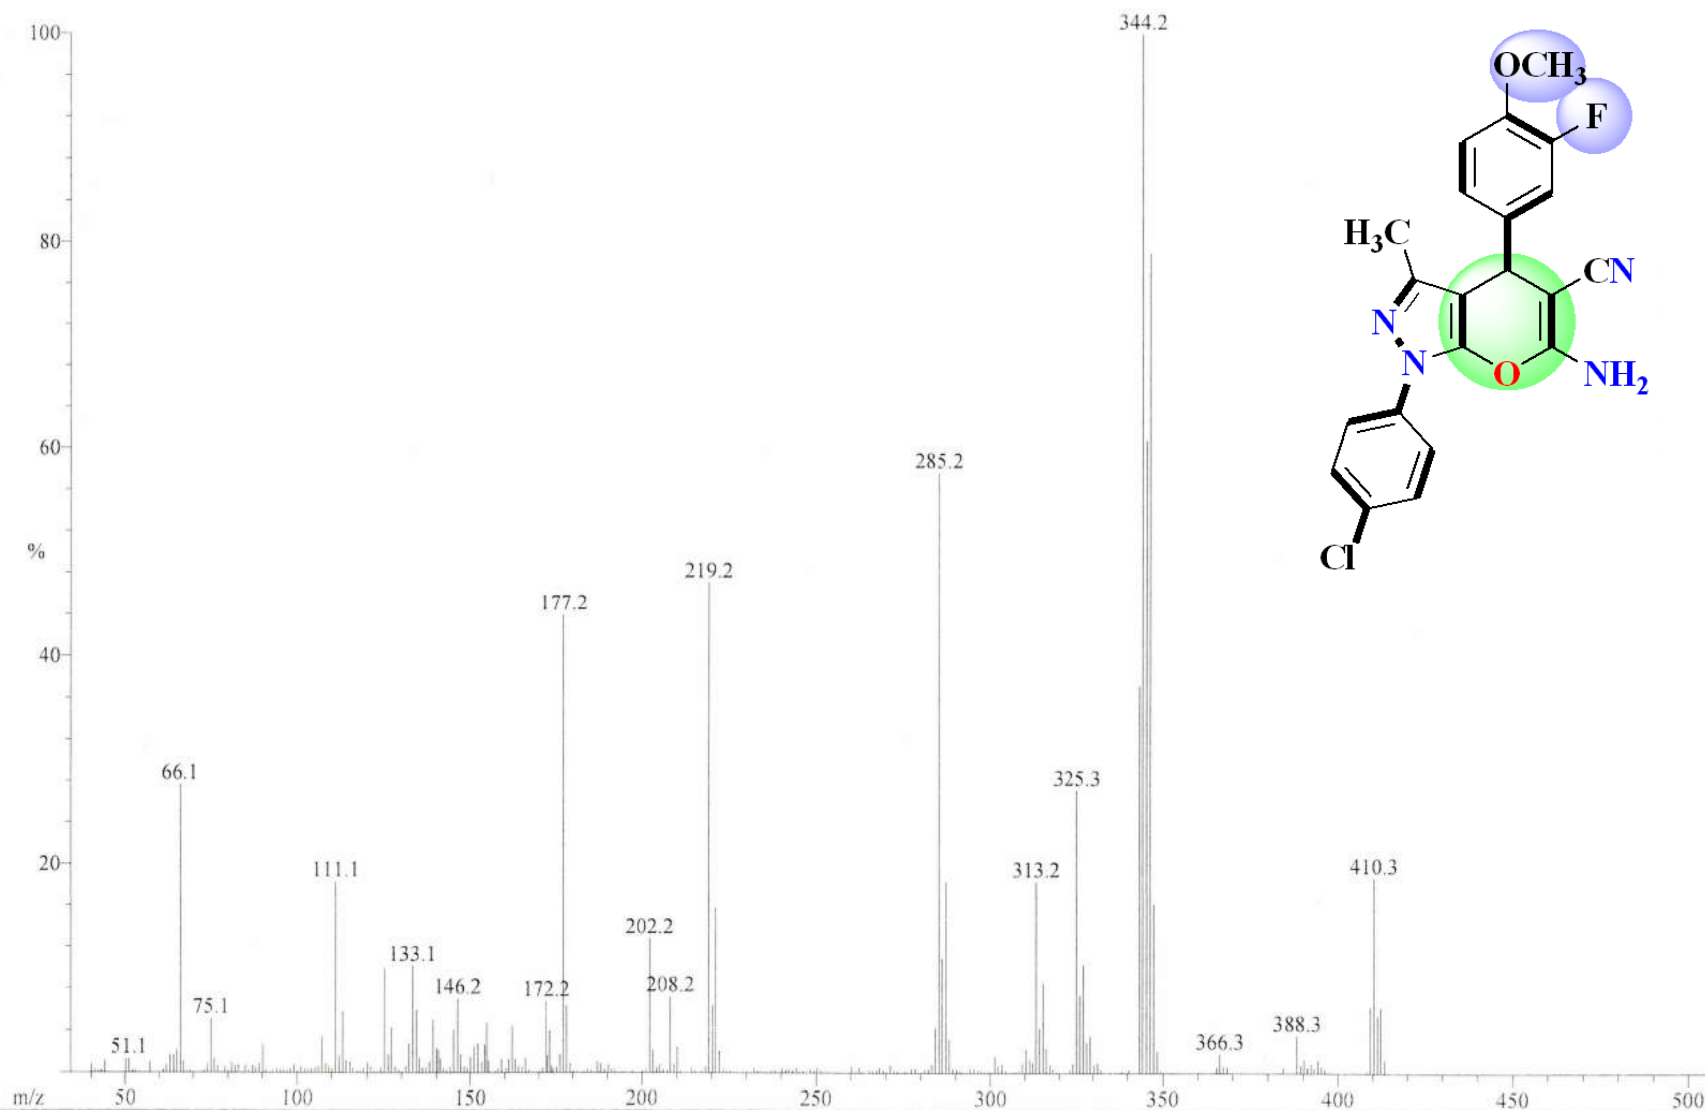

File: BO-I-157A

Date Run: 03-06-2019 (Time Run: 14:28:47)

Sample: DR. O. BABATUNDE /DR. KHALID

Instrument: JEOL JMS600H-1

Run By: HEJ-104

Ionization mode: EI+

Scan: 18

R.T.: 1.5

Base: m/z 344; 100%FS TIC: 14150656

**Compound = 13**

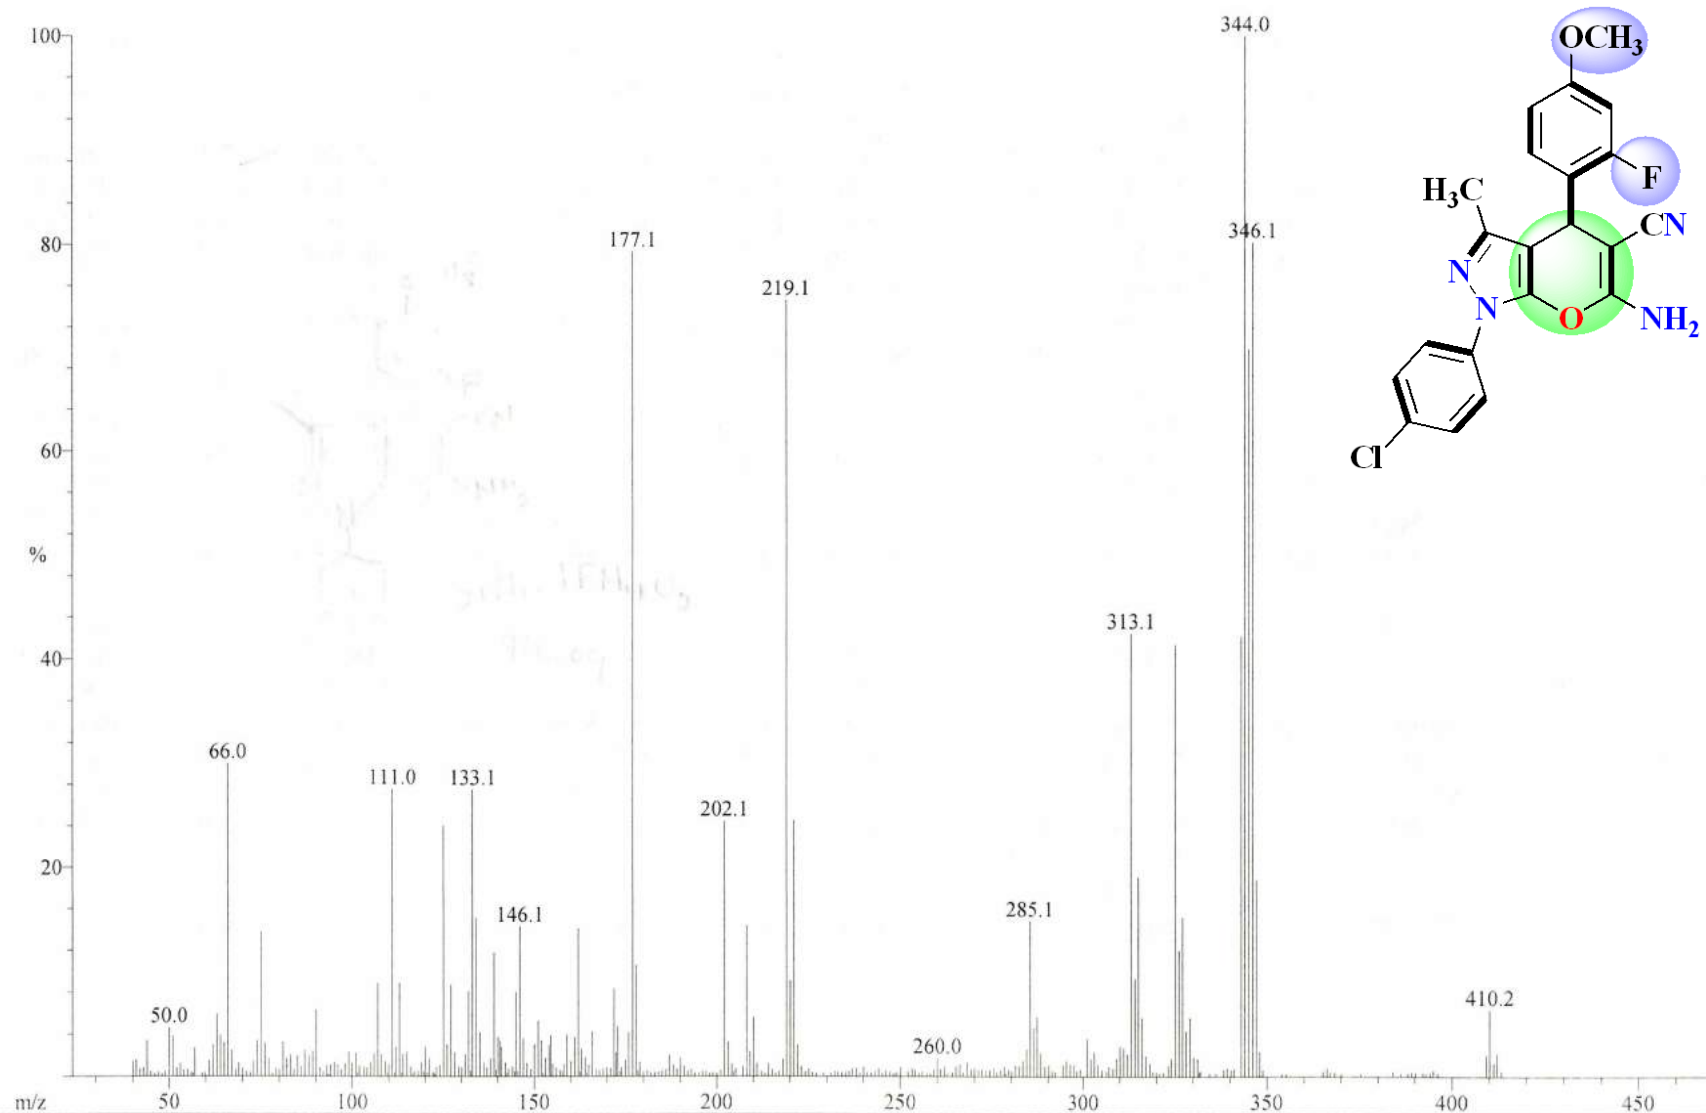

14

File: I  
Sample: DR. O. BABATUNDE /DR. KHALID  
Instrument: JEOL JMS600H-1

Date Run: 03-06-2019 (Time Run: 14:28:47)

Ionization mode: EI+

Run By: HEJ-104

Scan: 18  
Base: m/z 344; 100%FS TIC: 14150656

R.T.: 1.5

**Compound = 14**

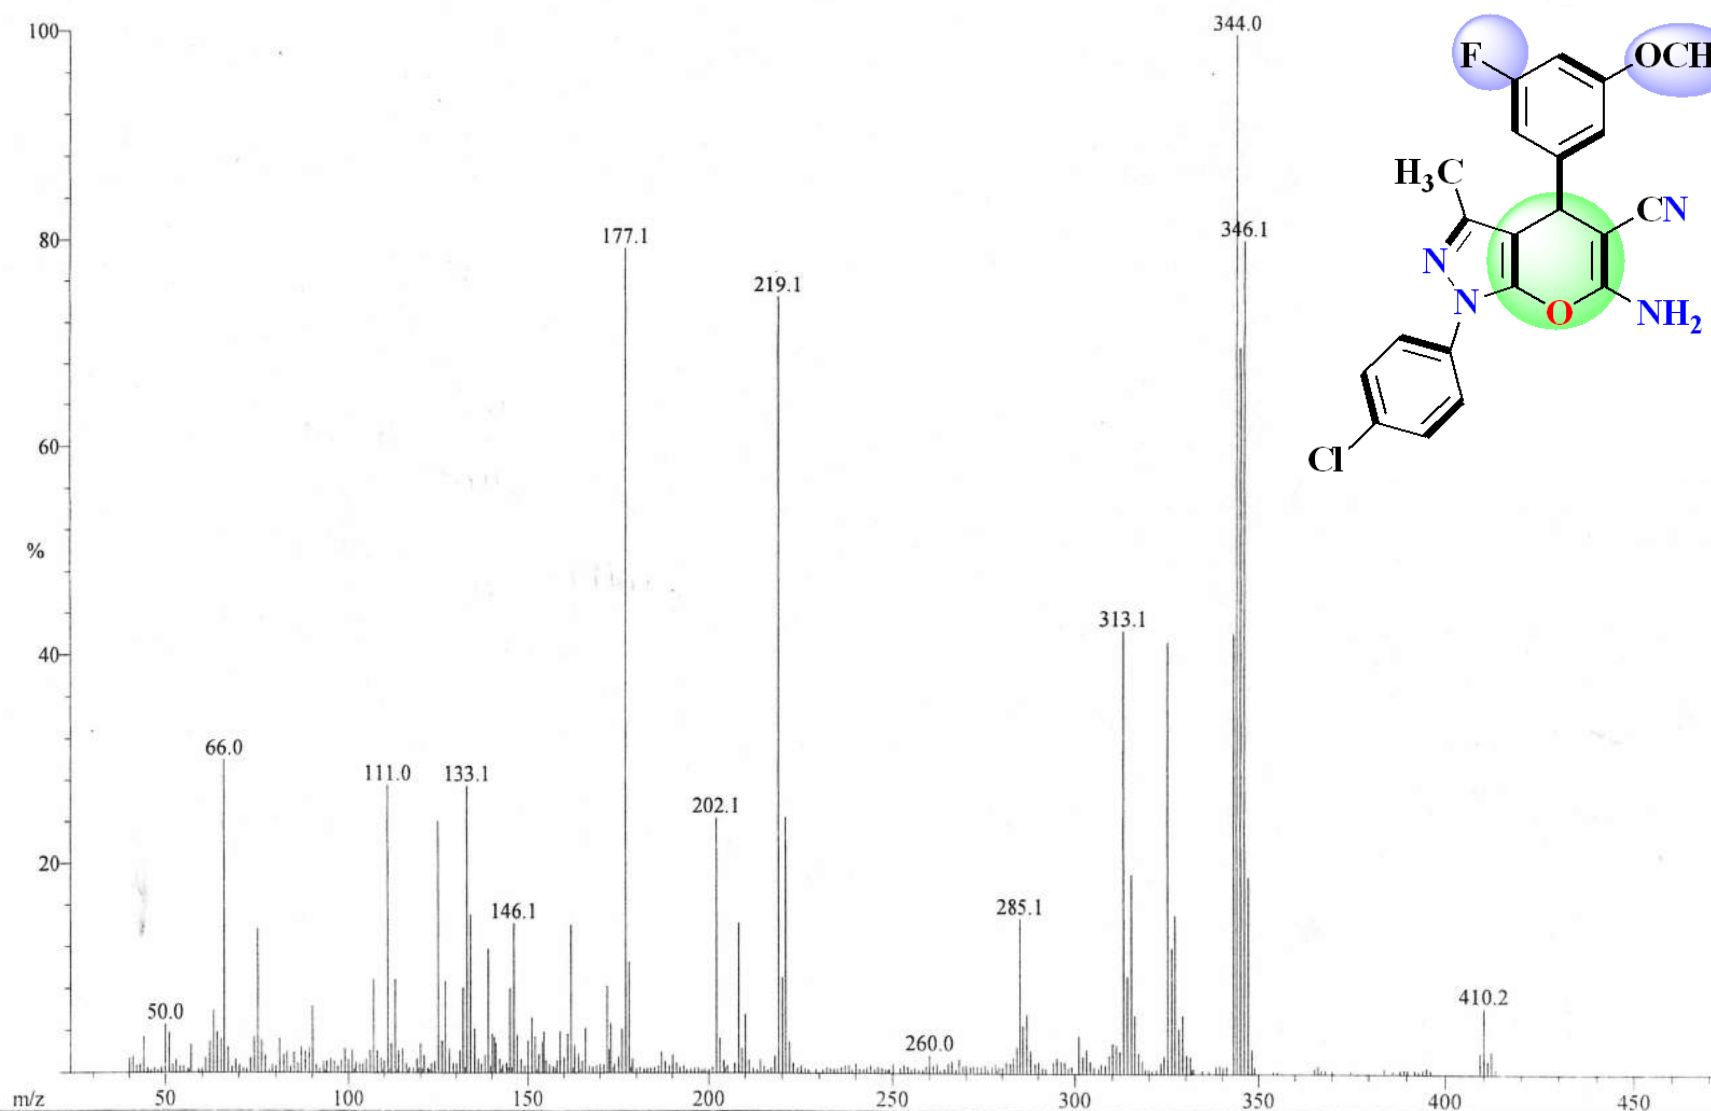

File: BO-II-23a

Date Run: 04-10-2019 (Time Run: 15:44:58)

Sample: DR.O.BABATUNDE /PROF. DR. KHALID

Instrument: JEOL JMS600H-1

Run By: HEJ-104

Ionization mode: EI+

Scan: 41

R.T.: 3.53

Base: m/z 295; 28%FS TIC: 1437526

**Compound = 15**

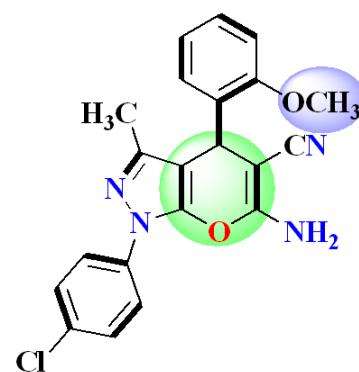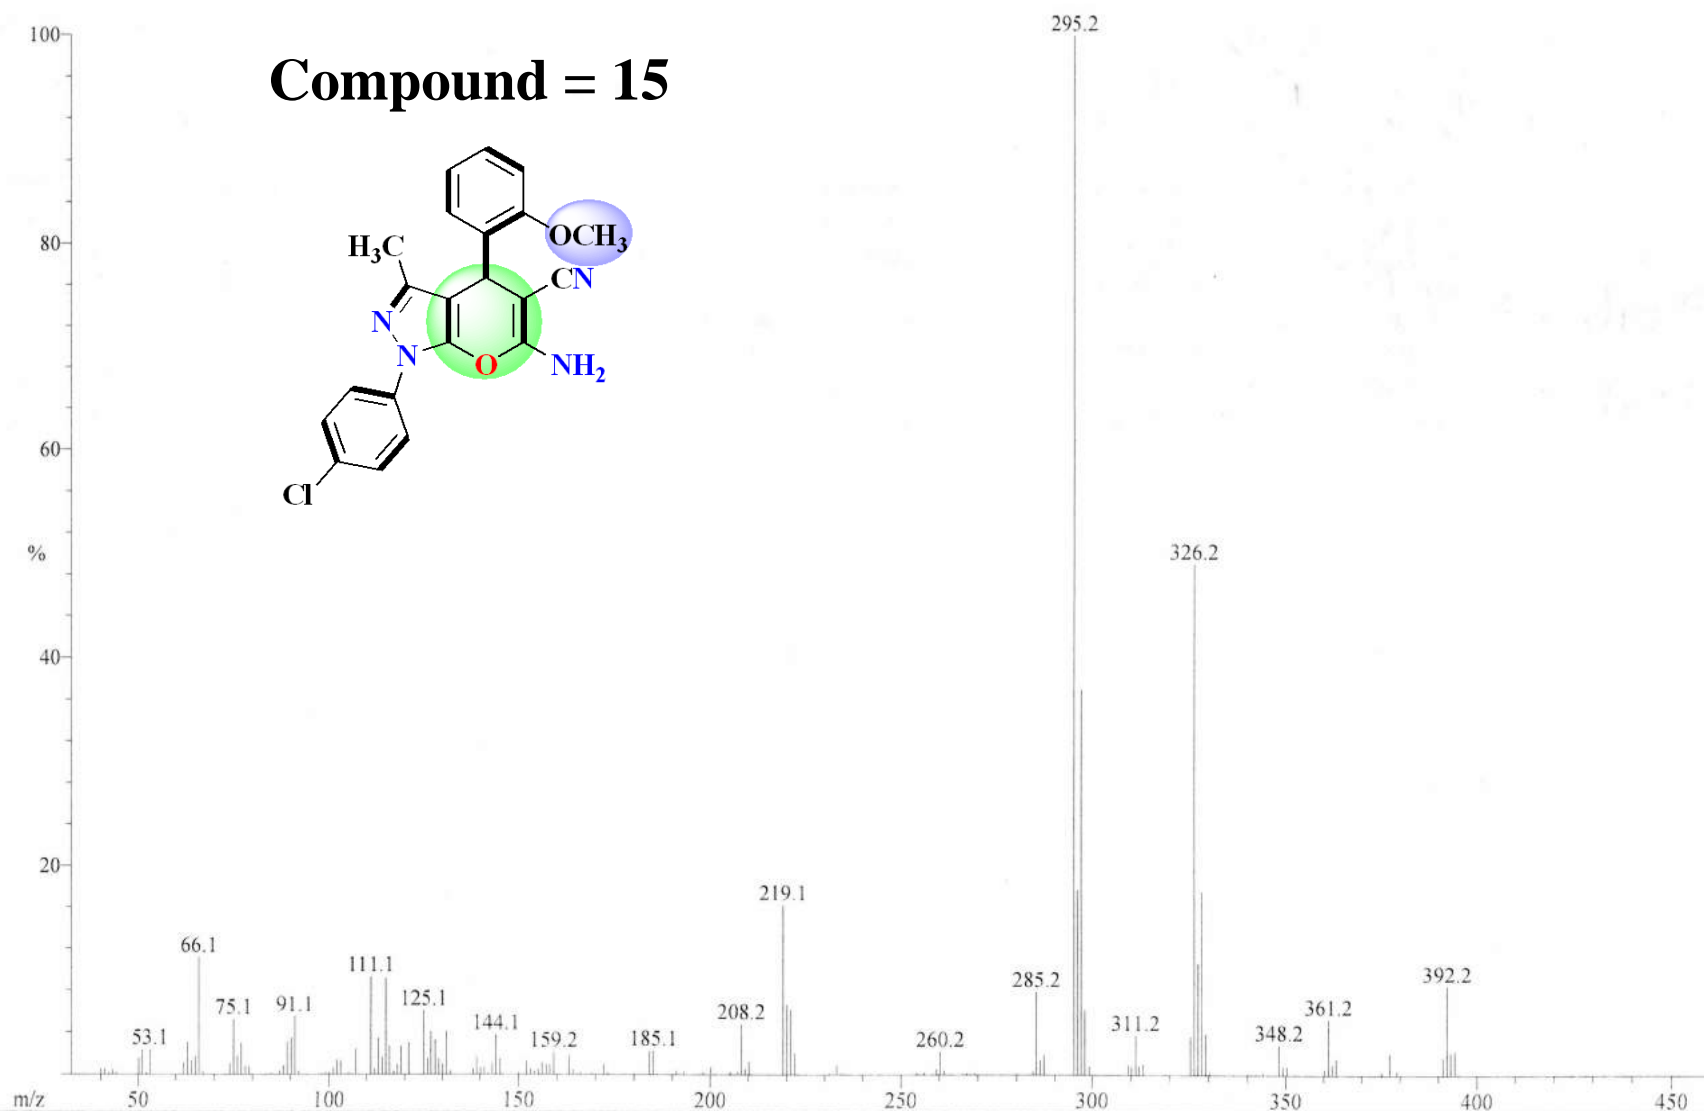

File: BO-I-181a

Date Run: 03-18-2019 (Time Run: 14:46:17)

Sample: DR.O. BABATUNDE /PROF. DR. KHALID

Instrument: JEOL JMS600H-1

Run By: HEJ-104

Ionization mode: EI+

Scan: 18-19

R.T.: 1.55

Base: m/z 325; 76.6%FS TIC: 11246025

**Compound = 16**

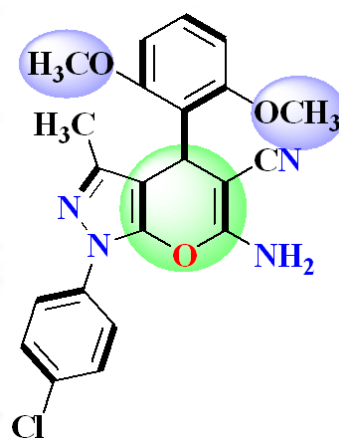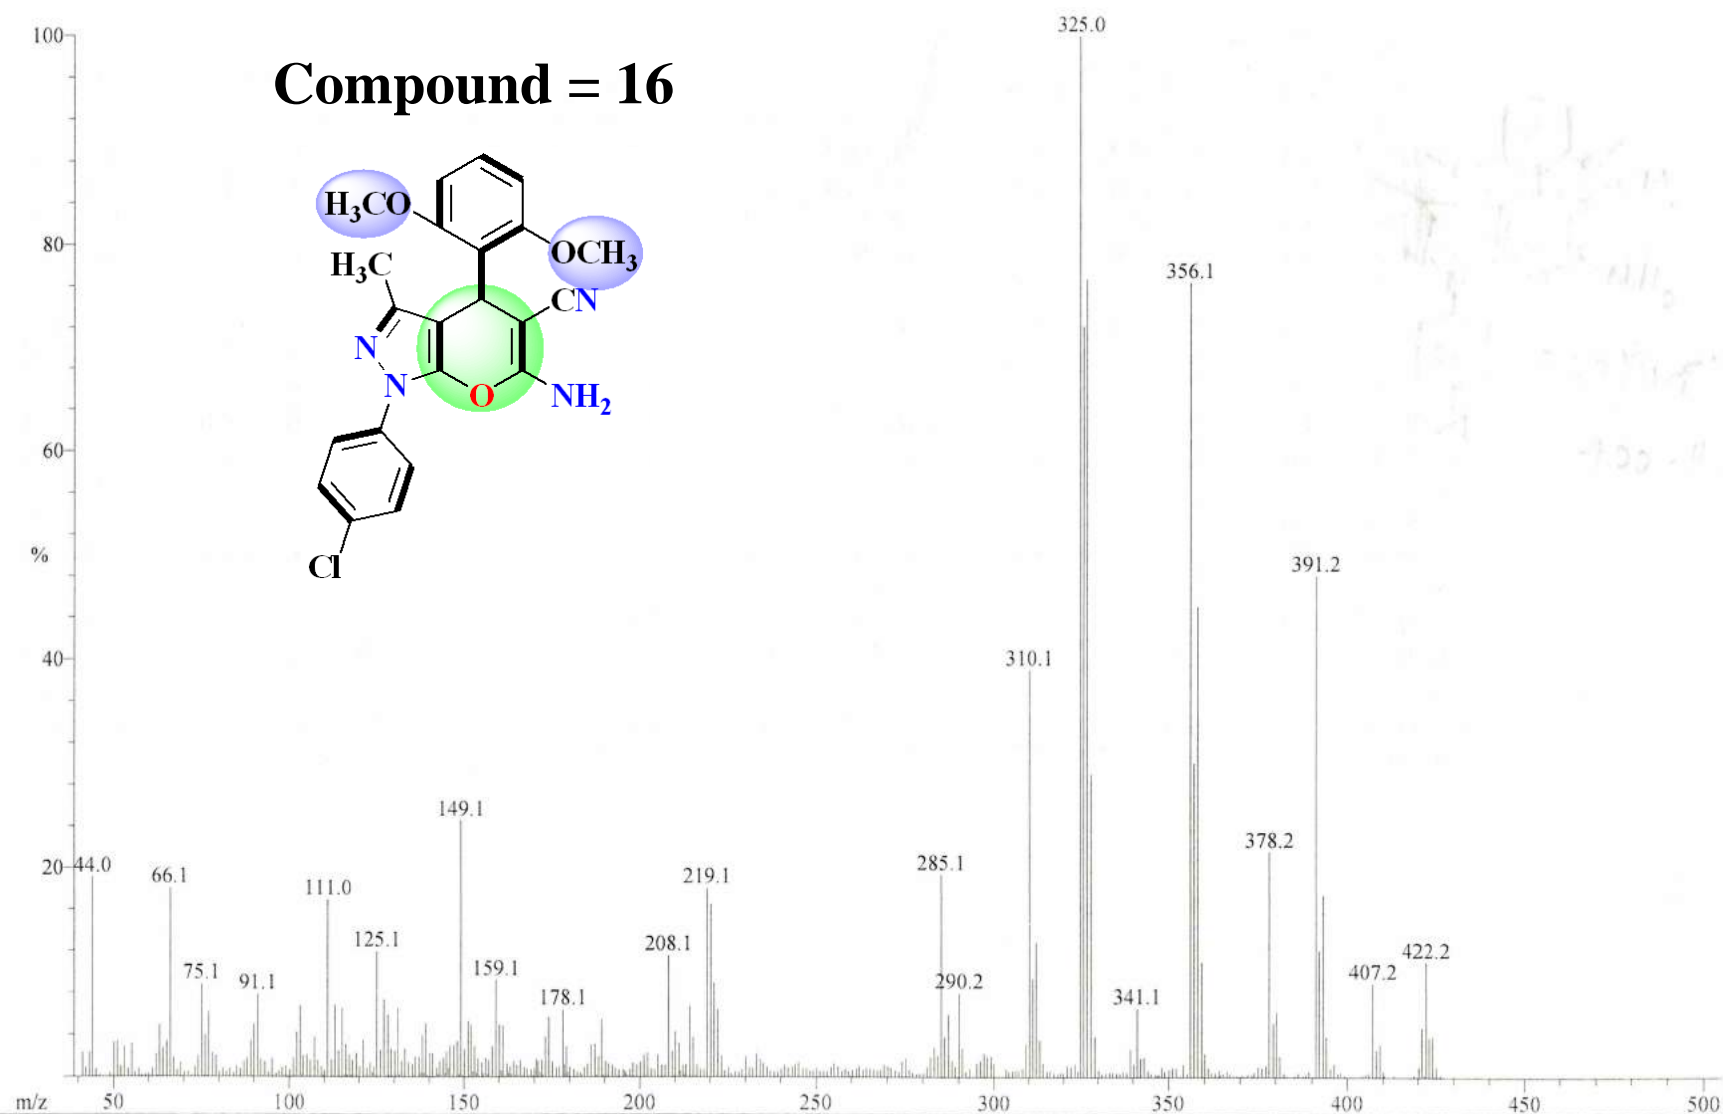



17

File: BO-I-159A

Date Run: 03-06-2019 (Time Run: 13:34:55)

Sample: DR. O. BABATUNDE /DR. KHALID

Instrument: JEOL JMS600H-1

Run By: HEJ-104

Ionization mode: EI+

Scan: 20-22

R.T.: 1.77

Base: m/z 91; 91.5%FS TIC: 9142487

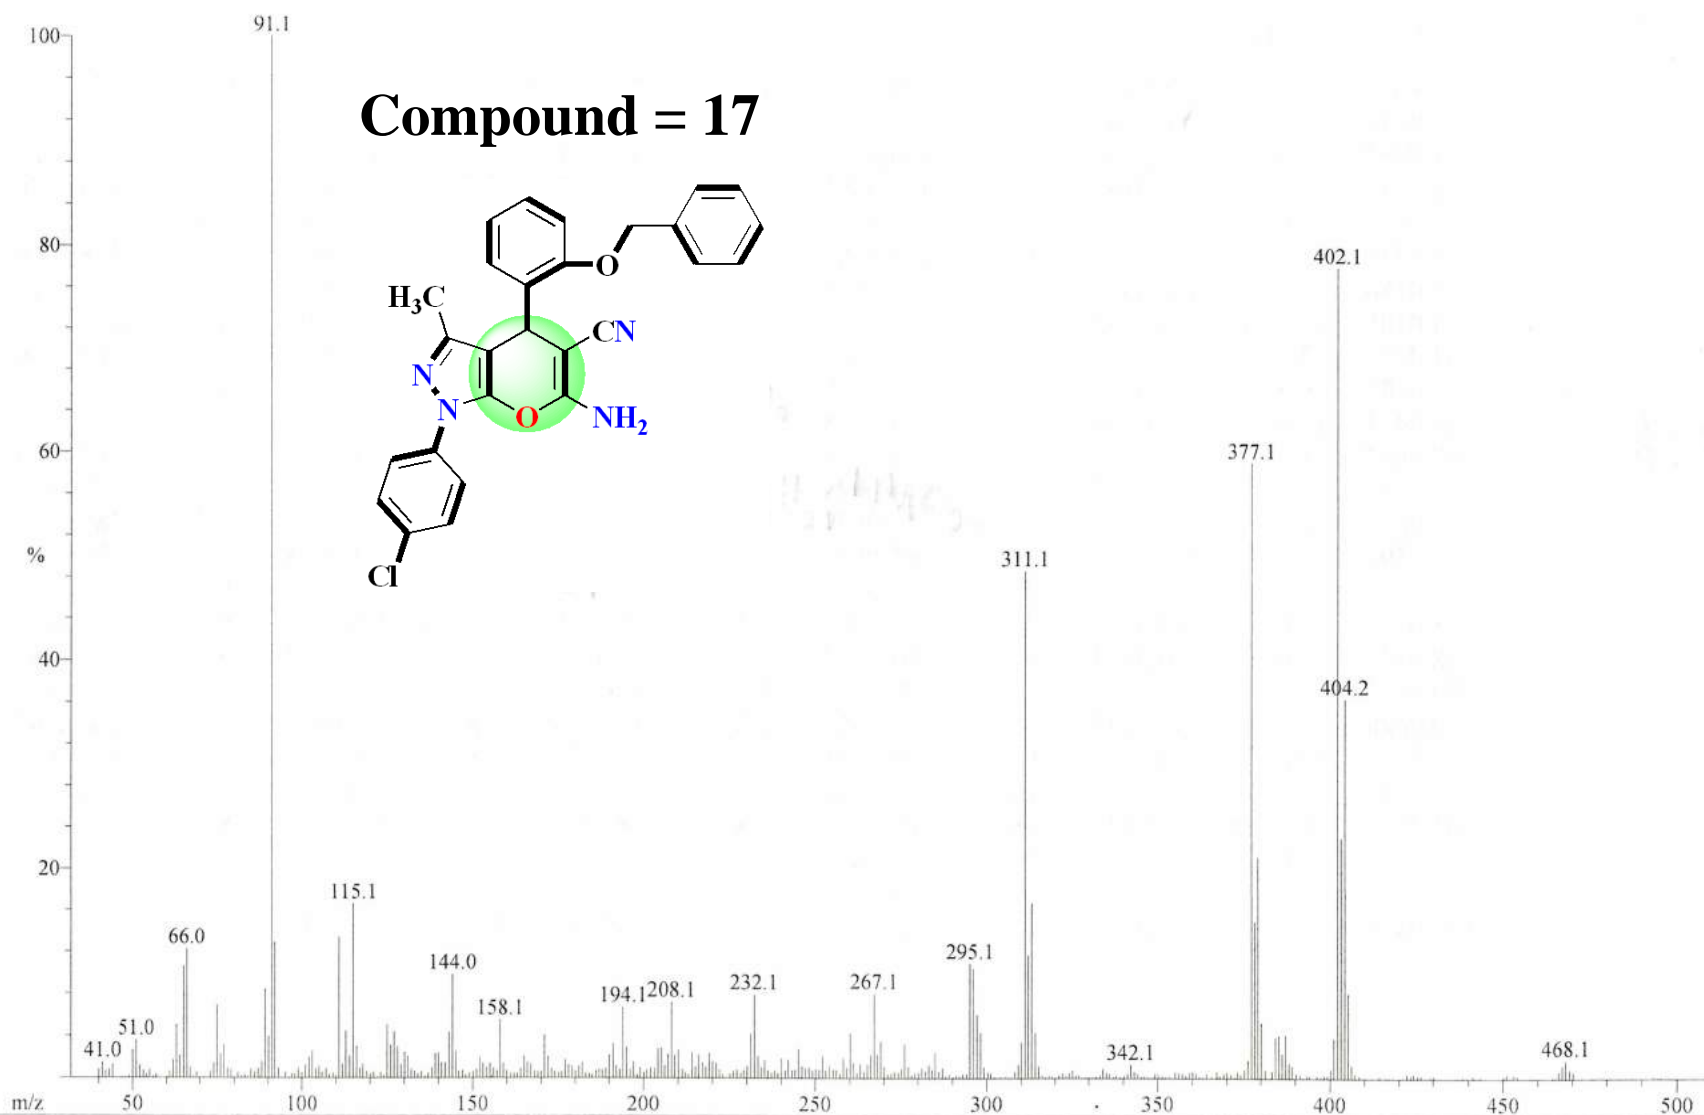

18

File: BO-I-189a-

Date Run: 03-30-2019 (Time Run: 12:20:30)

Sample: DR. BABATUNDE /PROF.DR. KHALID

Instrument: JEOL JMS600H-1

Run By: HEJ-104

Ionization mode: EI+

Scan: 18

R.T.: 1.5

Base: m/z 91; 99.8%FS TIC: 4627971

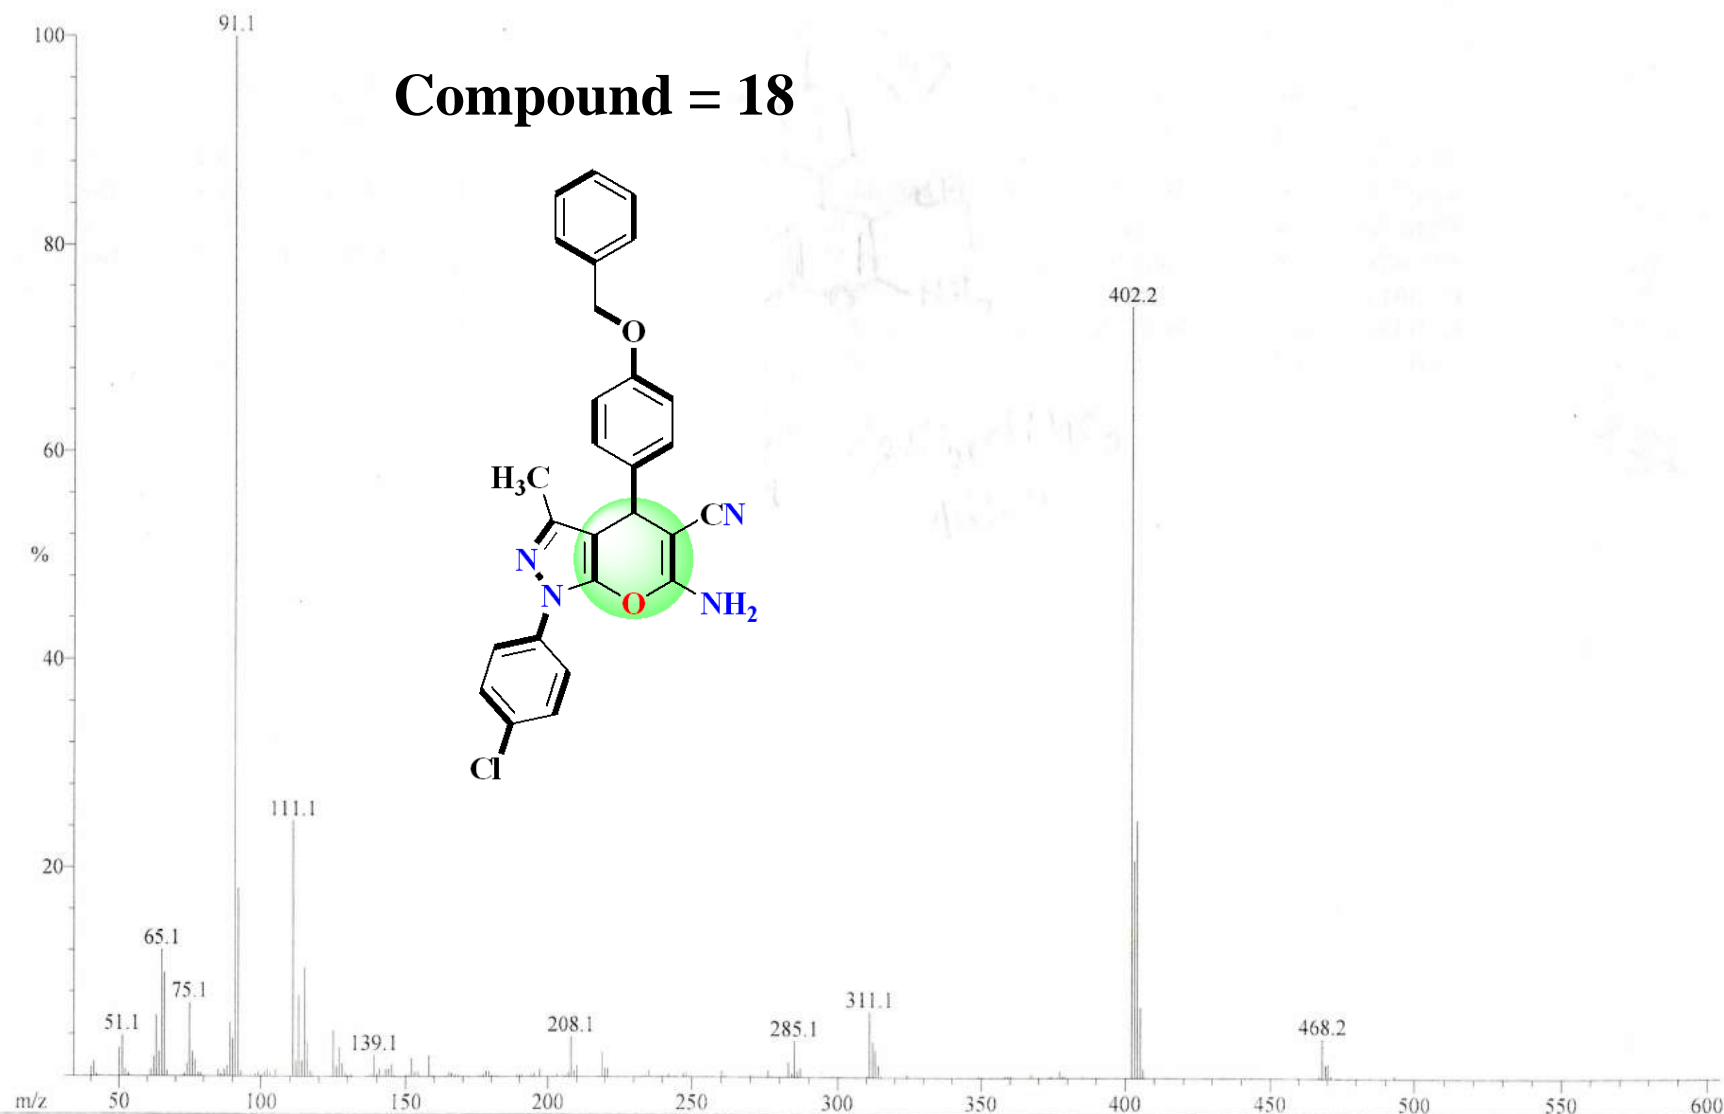

19

File: BO-I-191a

Date Run: 03-30-2019 (Time Run: 13:07:43)

Sample: DR. BABATUNDE /PROF. DR. KHALID

Instrument: JEOL JMS600H-1

Run By: HEJ-104

Ionization mode: EI+

Scan: 15

R.T.: 1.23

Base: m/z 302; 99.8%FS TIC: 7392191

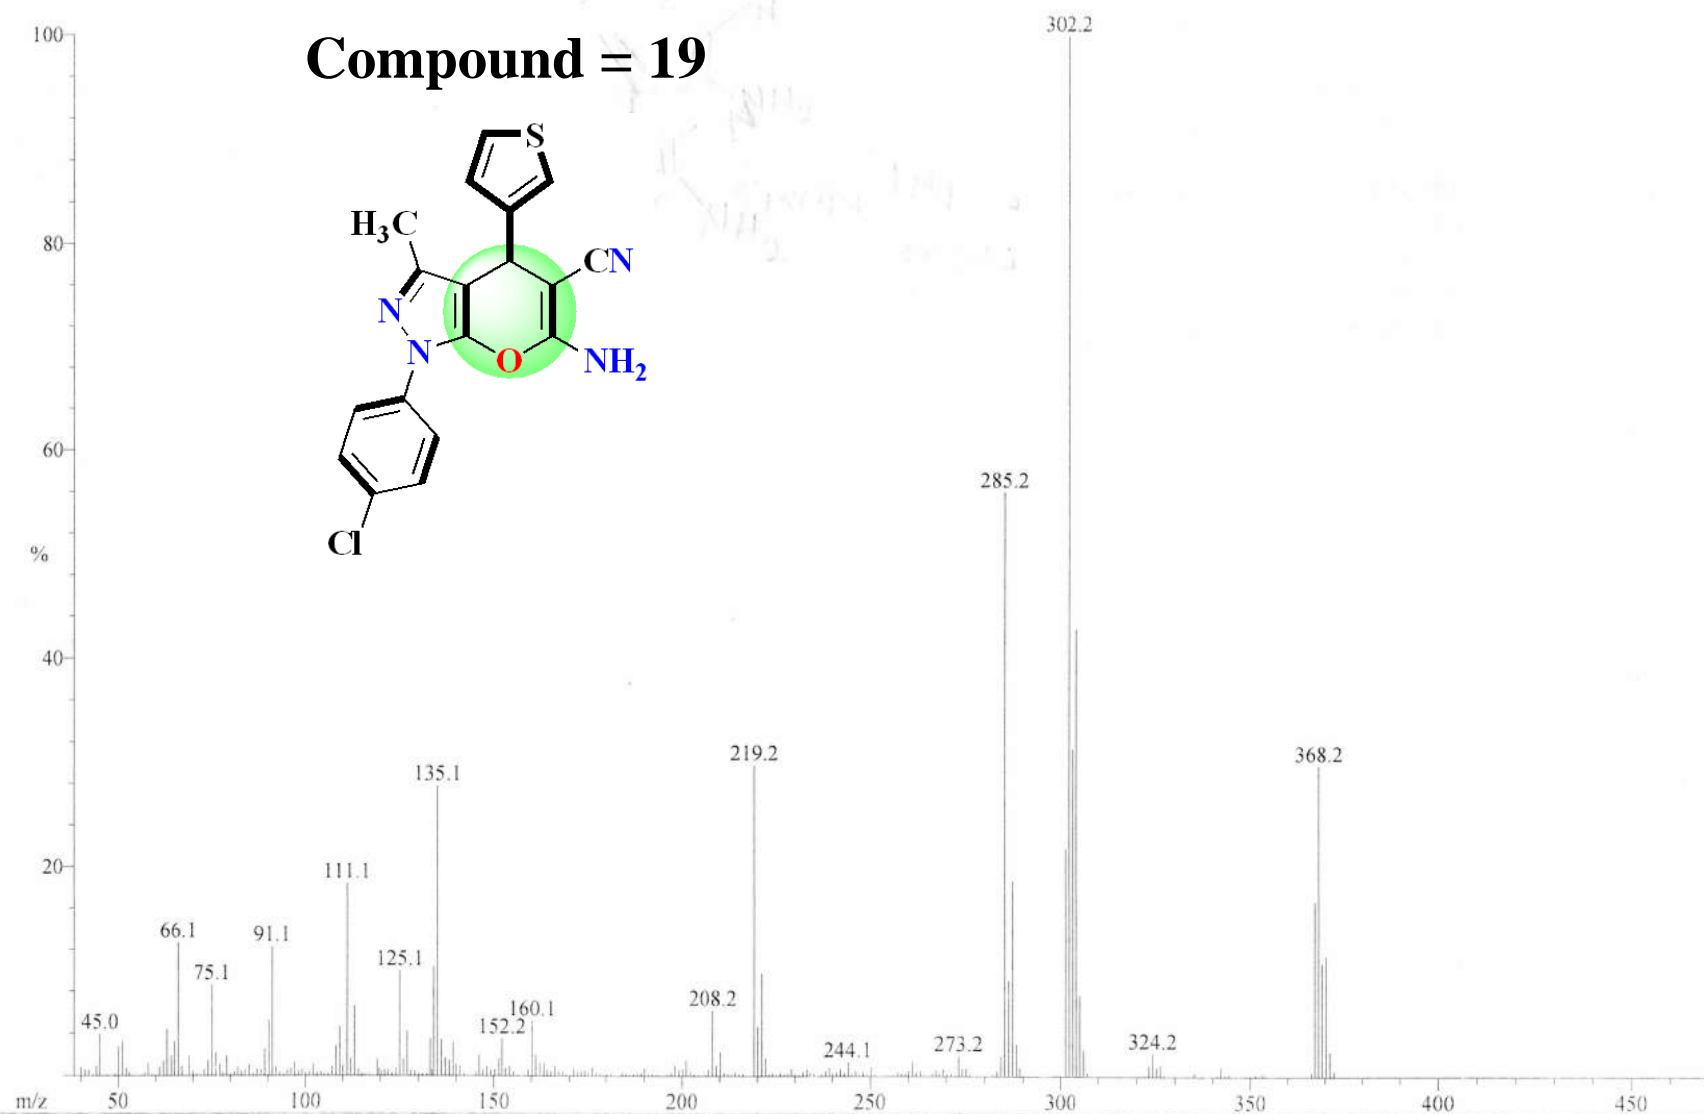

20

File: BC  
Sample: DR.O. BABATUNDE /PROF. DR. KHALID  
Instrument: JEOL JMS600H-1

Date Run: 03-18-2019 (Time Run: 14:46:17)

Ionization mode: EI+

Run By: HEJ-104

Scan: 18-19

R.T.: 1.55

Base: m/z 325; 76.6%FS TIC: 11246025

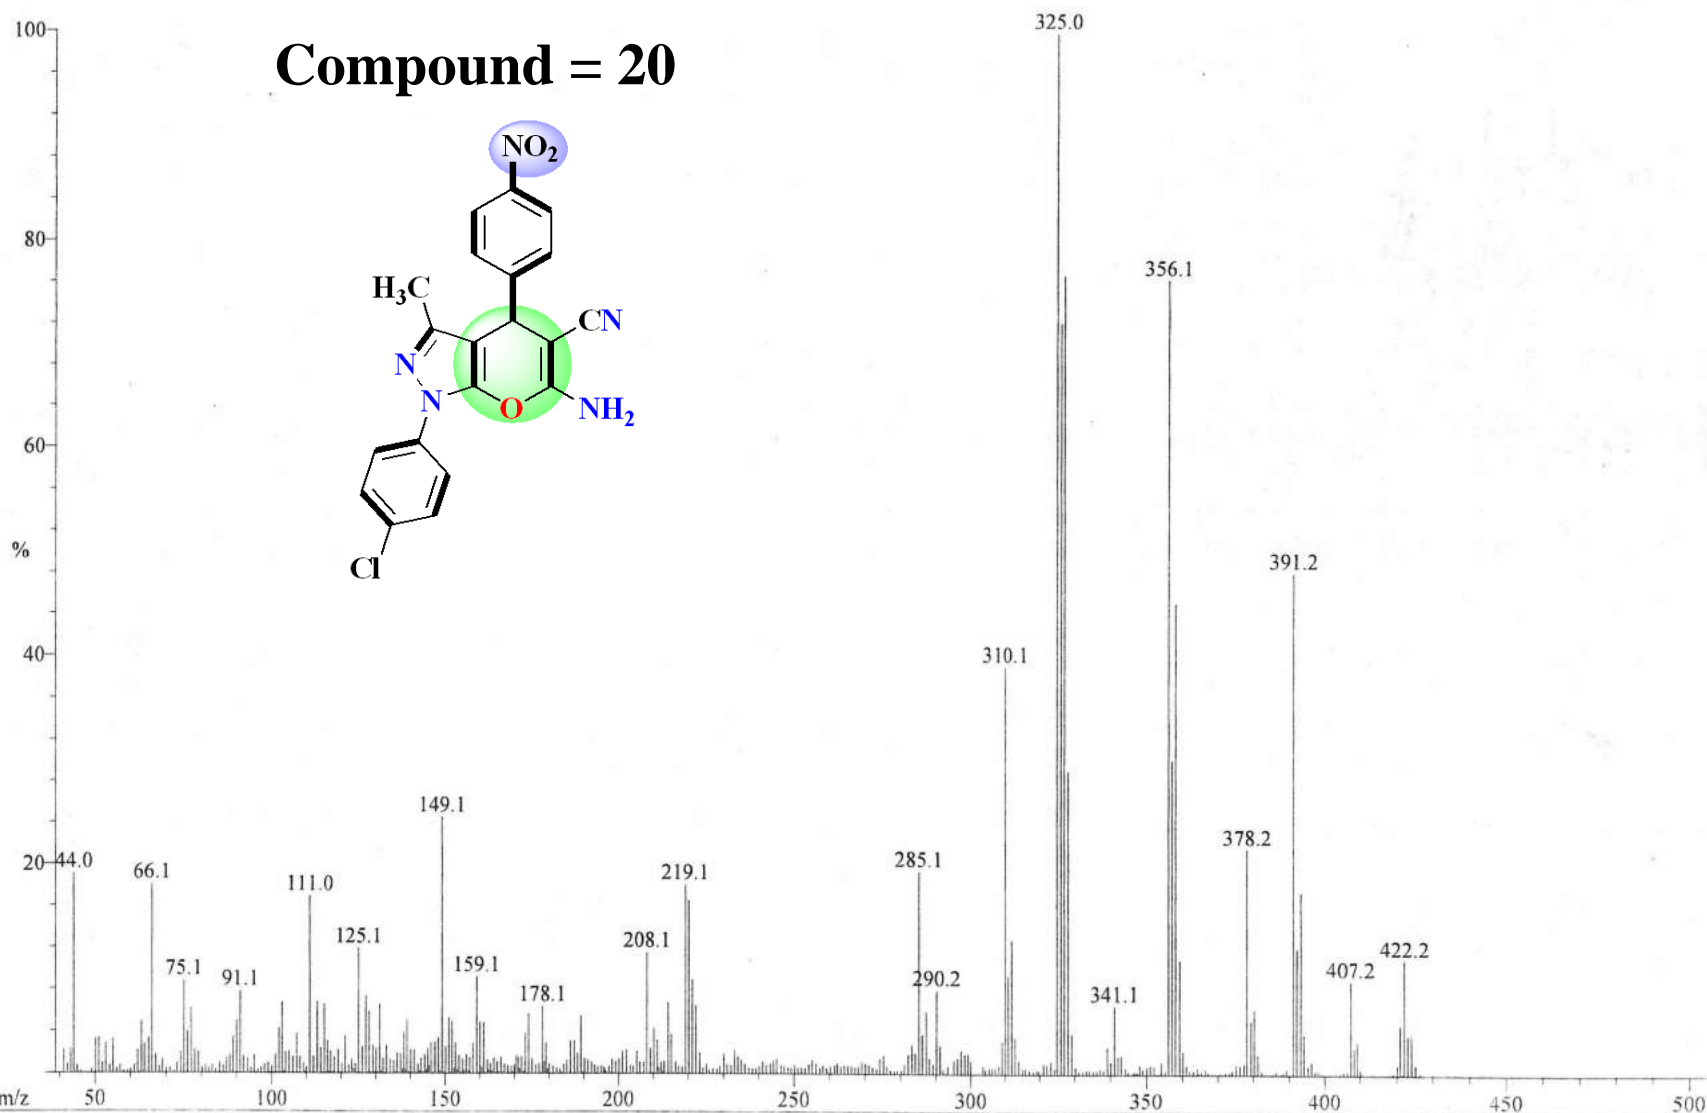

Supplement: Supplementary file 3 [file 1]
