# Supplementary material
Source: publisher figshare collection journal article supplement (https://future-science-group.figshare.com/articles/dataset/_/21378228)
Supplement: Supplementary file 1 [file 1]

Babatunde / Dr. Khalid / BO-I-I-151A  
 1H

# Compound = 1

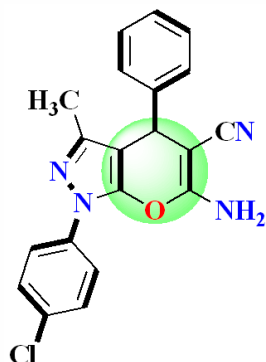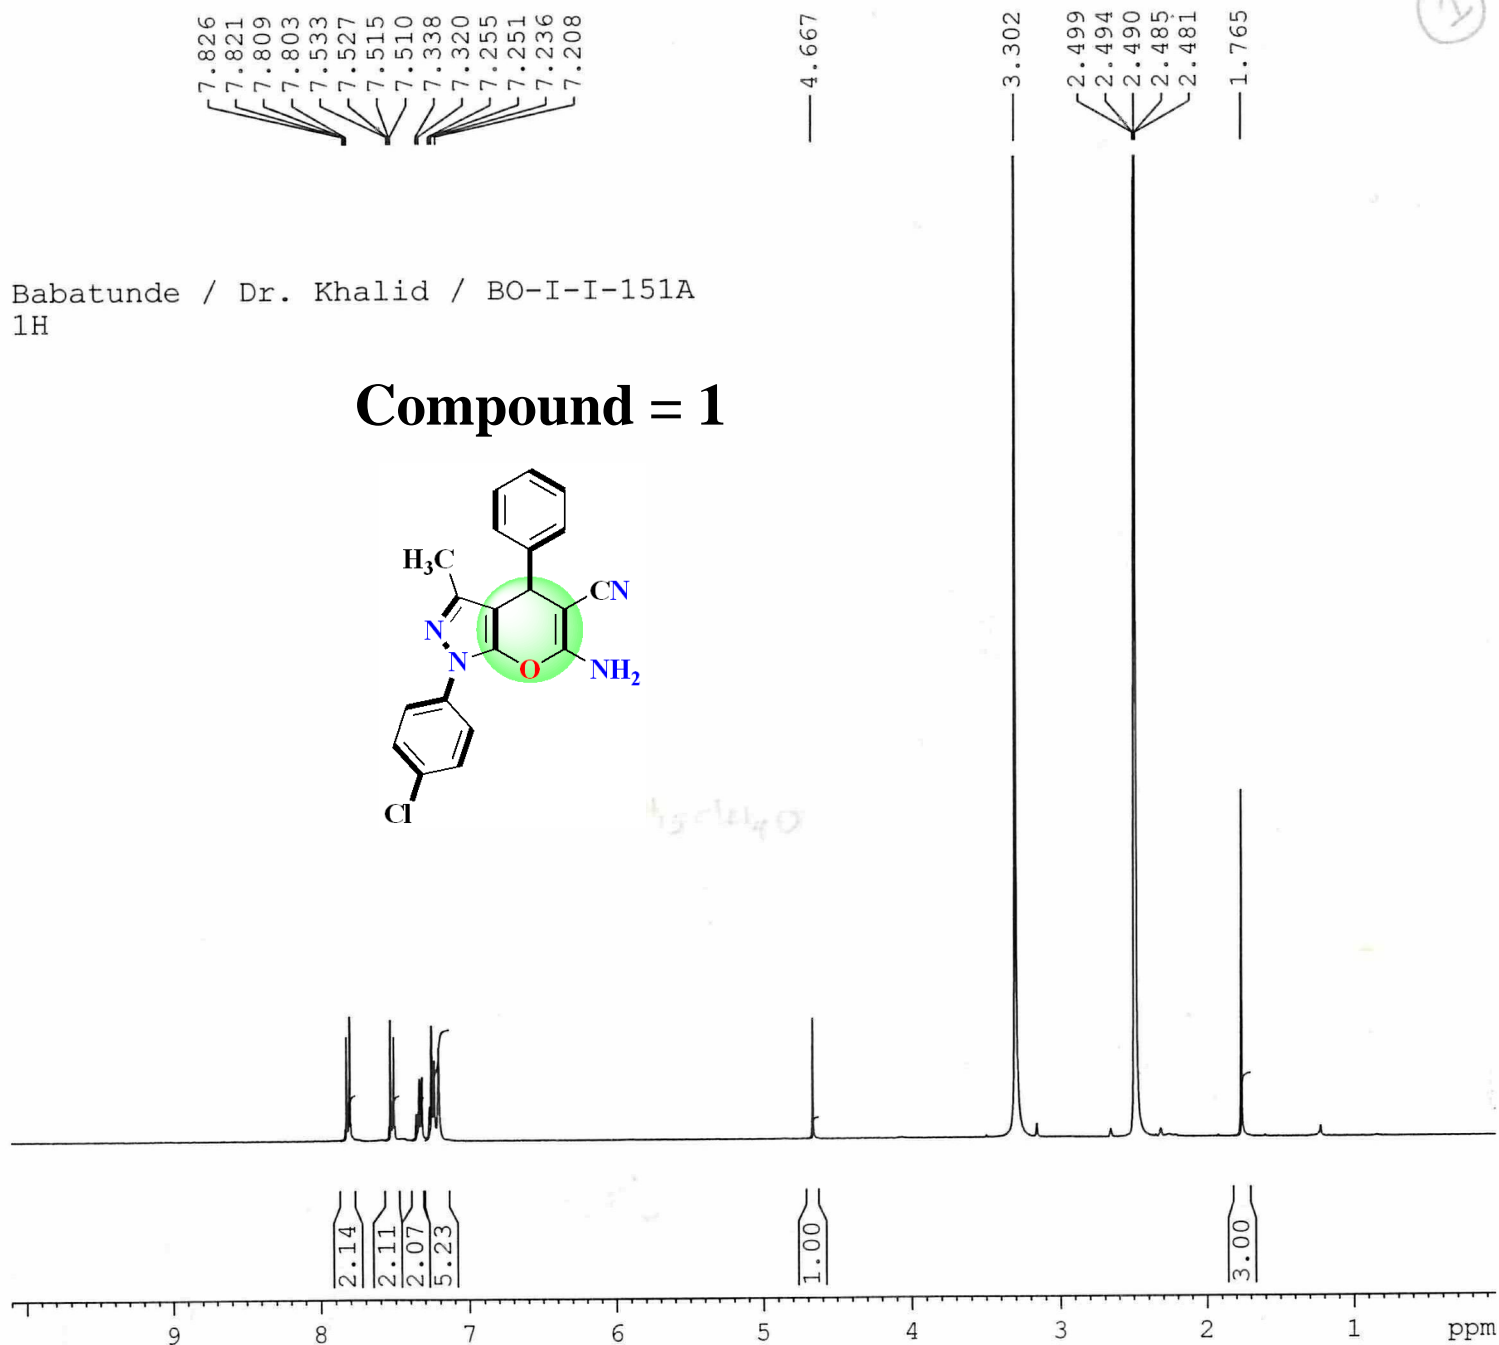

AVANCE NEO 400 MHz  
 Lab # 115

Current Data Parameters  
 NAME mar06-19  
 EXPNO 2  
 PROCNO 1

F2 - Acquisition Parameters  
 Date\_ 20190306  
 Time 9.25 h  
 INSTRUM AVNeo\_400  
 PROBHD z3756\_0202 (PH  
 PULPROG zg30  
 TD 32768  
 SOLVENT DMSO  
 NS 32  
 DS 0  
 SWH 7812.500 Hz  
 FIDRES 0.476837 Hz  
 AQ 2.0971520 sec  
 RG 101  
 DW 64.000 usec  
 DE 6.50 usec  
 TE 300.0 K  
 D1 2.00000000 sec  
 TD0 1  
 SFO1 399.9331994 MHz  
 NUC1 1H  
 P0 5.00 usec  
 P1 15.00 usec  
 PLW1 8.02390003 W

F2 - Processing parameters  
 SI 32768  
 SF 399.9300073 MHz  
 WDW EM  
 SSB 0  
 LB 0.30 Hz  
 GB 0  
 PC 1.00

DR.BABATUNDE/DR.KHALID/BO.I.187A/DMSO

300 K

<sup>1</sup>H

**Compound = 2**

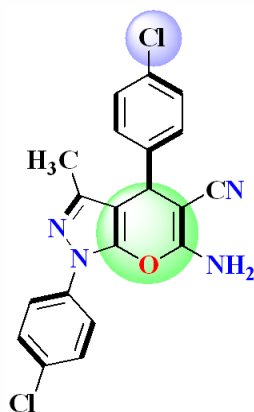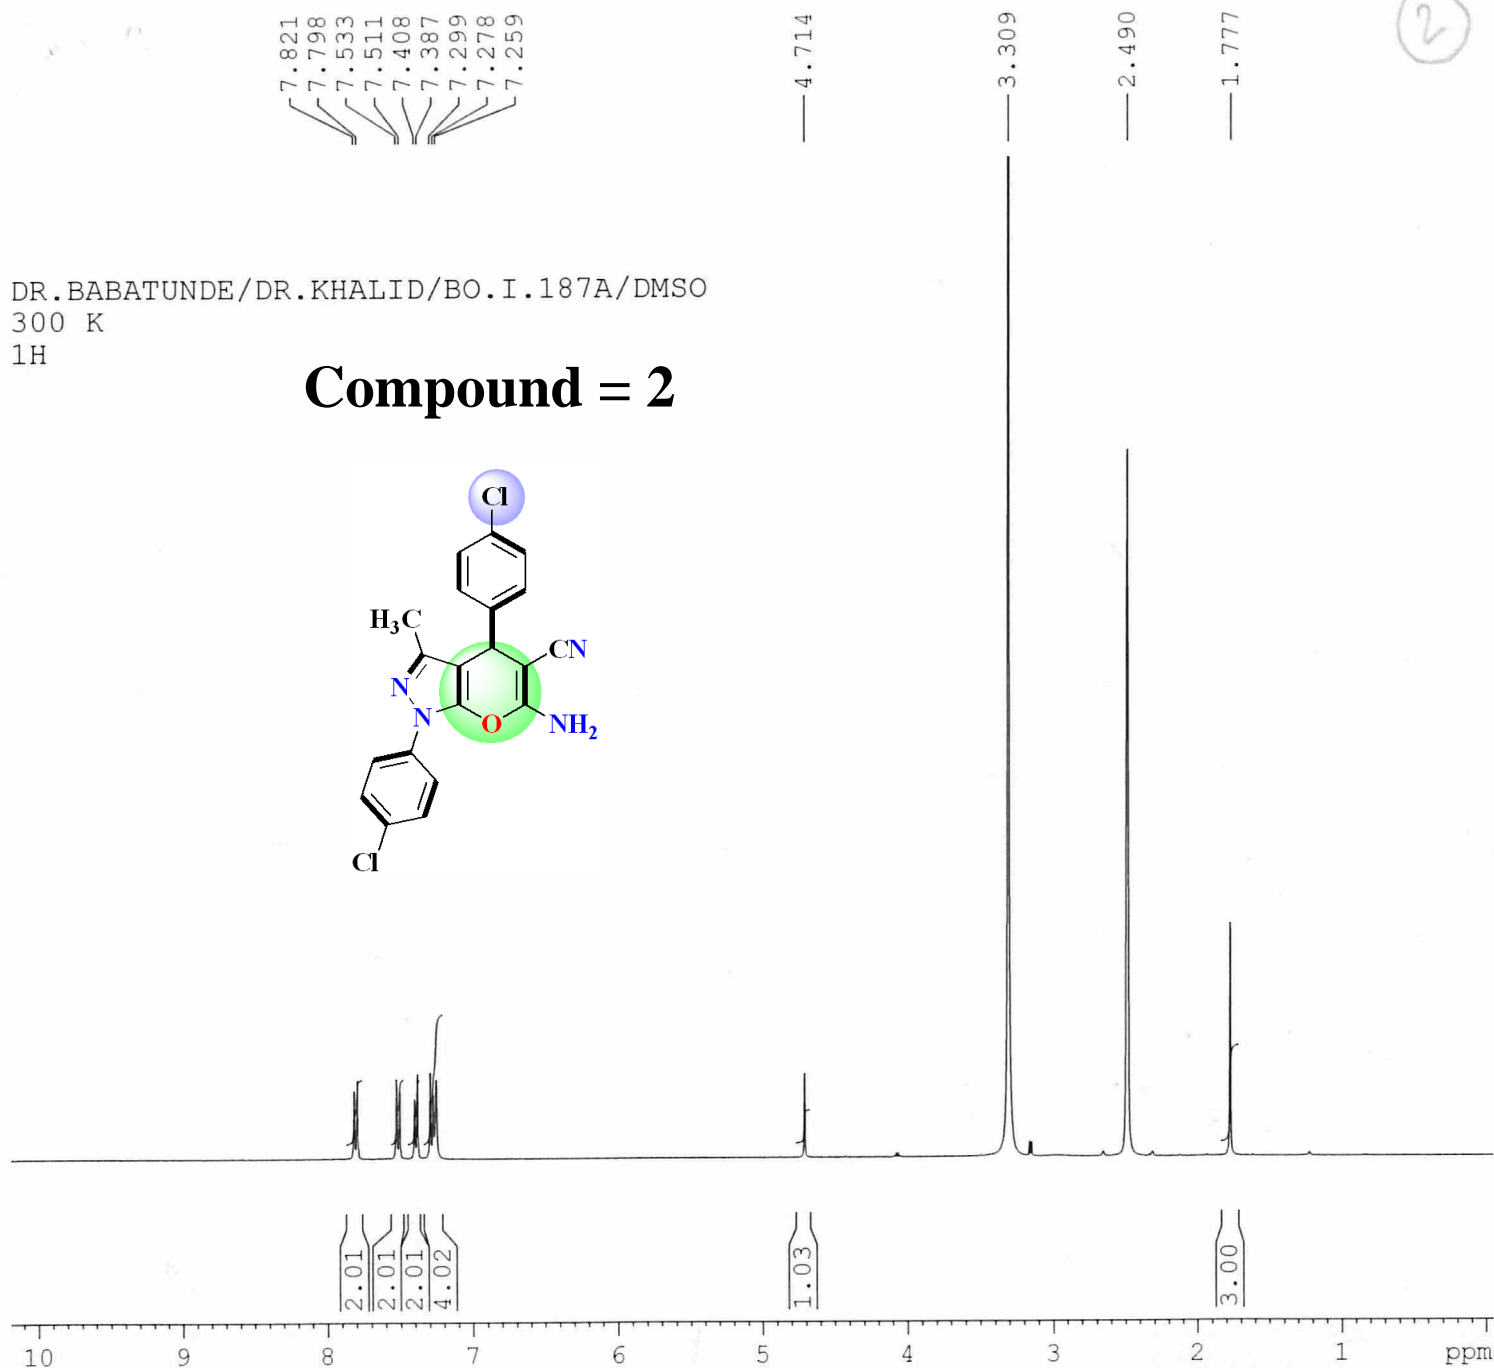

AVANCE NEO 400 MHz  
Lab # 115

Current Data Parameters  
NAME apr05-19  
EXPNO 2  
PROCNO 1

F2 - Acquisition Parameters  
Date\_ 20190405  
Time 12.07 h  
INSTRUM AVNeo\_400  
PROBHD zg30  
PULPROG zg30  
TD 32768  
SOLVENT DMSO  
NS 64  
DS 0  
SWH 7812.500 Hz  
FIDRES 0.476837 Hz  
AQ 2.0971520 sec  
RG 101  
DW 64.000 usec  
DE 6.50 usec  
TE 300.0 K  
D1 1.50000000 sec  
TD0 1  
SFO1 399.9331994 MHz  
NUC1 <sup>1</sup>H  
P0 5.00 usec  
P1 15.00 usec  
PLW1 8.02390003 W

F2 - Processing parameters  
SI 32768  
SF 399.9300071 MHz  
WDW EM  
SSB 0  
LB 0.30 Hz  
GB 0  
PC 1.00

Dr. Babatumde / Dr. Khalid / BO-II.13A

300 K

<sup>1</sup>H

## Compound = 3

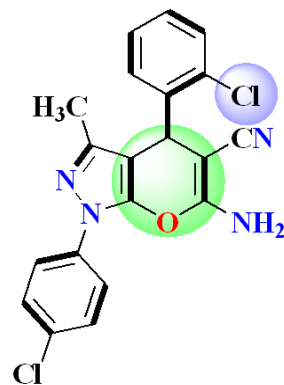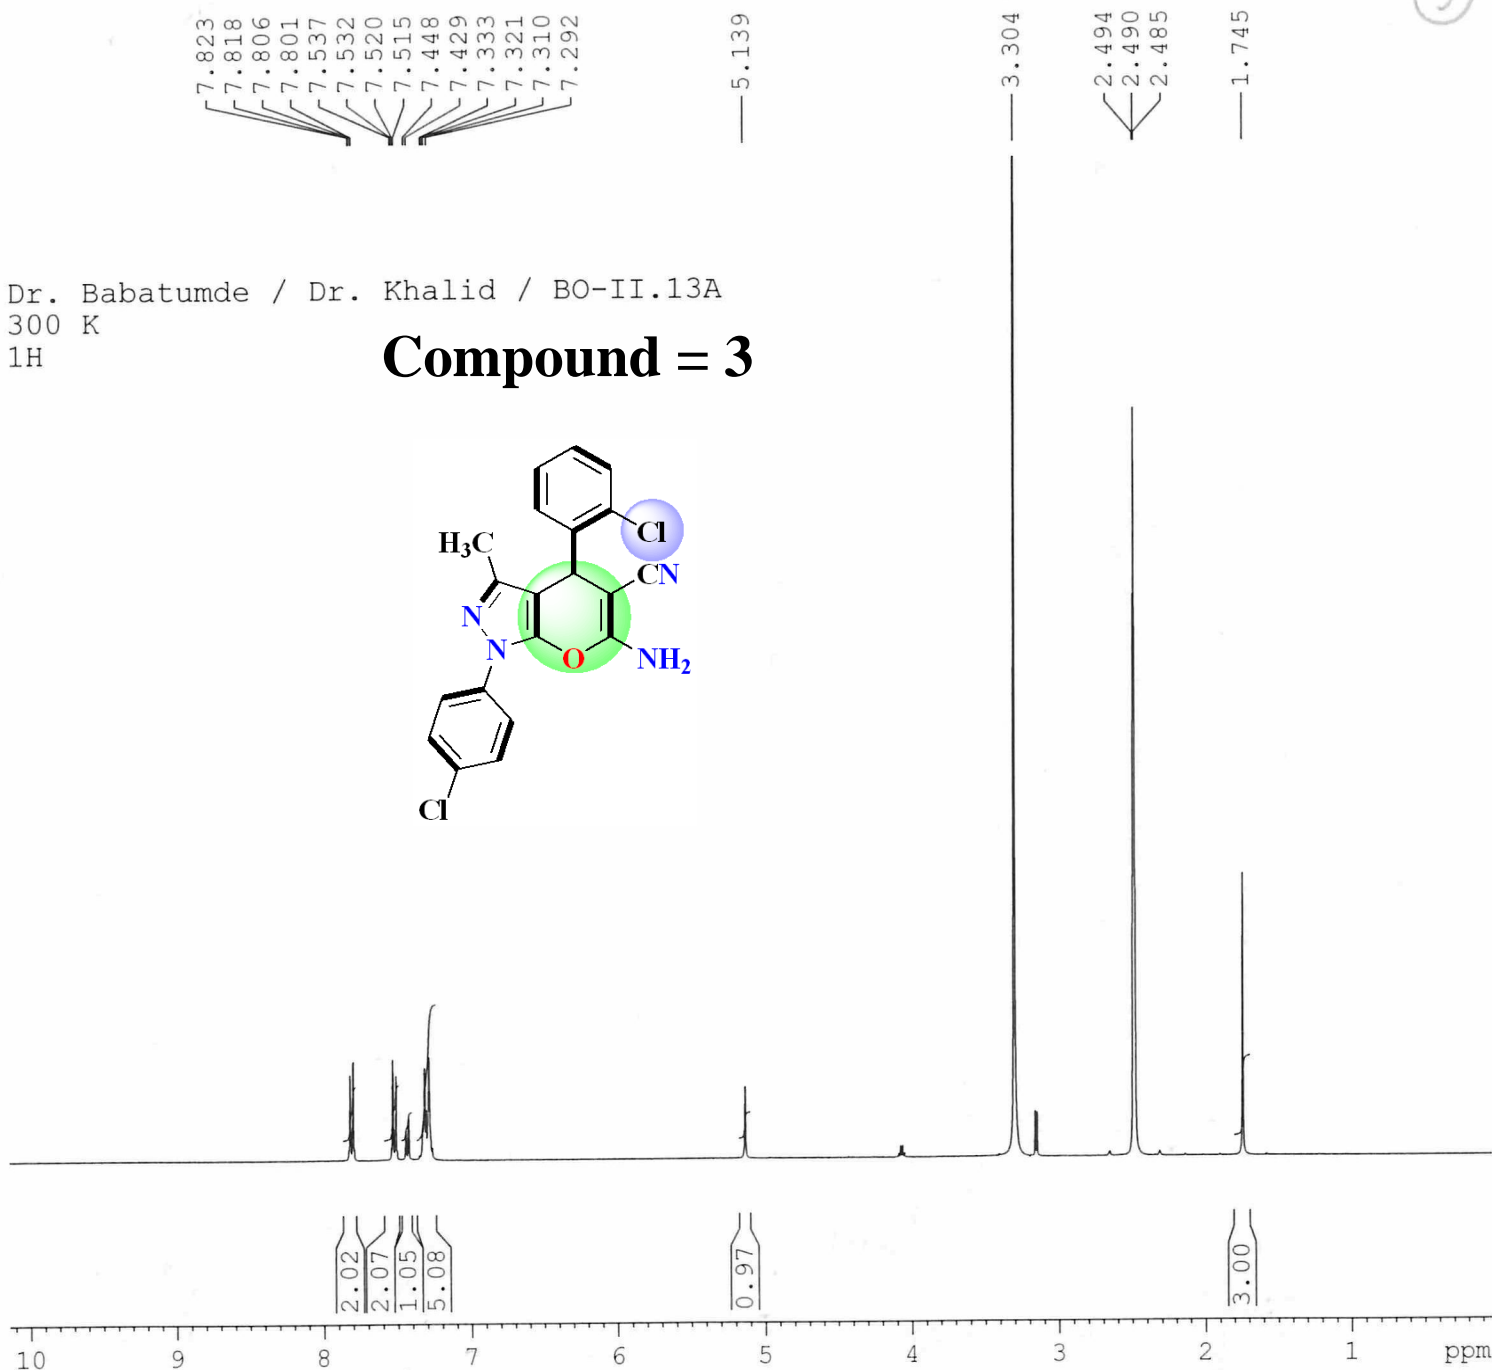

AVANCE NEO 400 MHz  
Lab # 115

Current Data Parameters  
NAME apr11-19  
EXPNO 4  
PROCNO 1

F2 - Acquisition Parameters  
Date\_ 20190411  
Time\_ 12.21 h  
INSTRUM AVNeo\_400  
PROBHD z3756\_0202 (PH  
PULPROG zg30  
TD 32768  
SOLVENT DMSO  
NS 64  
DS 0  
SWH 7812.500 Hz  
FIDRES 0.476837 Hz  
AQ 2.0971520 sec  
RG 101  
DW 64.000 usec  
DE 6.50 usec  
TE 300.0 K  
D1 1.50000000 sec  
TD0 1  
SFO1 399.9331994 MHz  
NUC1 <sup>1</sup>H  
P0 5.00 usec  
P1 15.00 usec  
PLW1 8.02390003 W

F2 - Processing parameters  
SI 32768  
SF 399.9300073 MHz  
WDW EM  
SSB 0  
LB 0.30 Hz  
GB 0  
PC 1.00

DR. BABATUNDE/DR. KHALID/BO. I. 161A/DMSO  
1H

**Compound = 4**

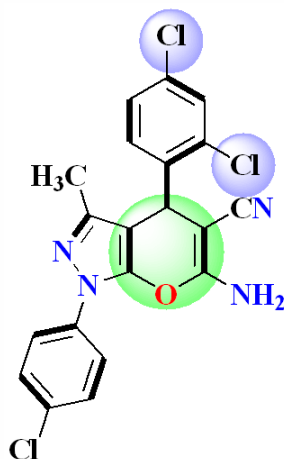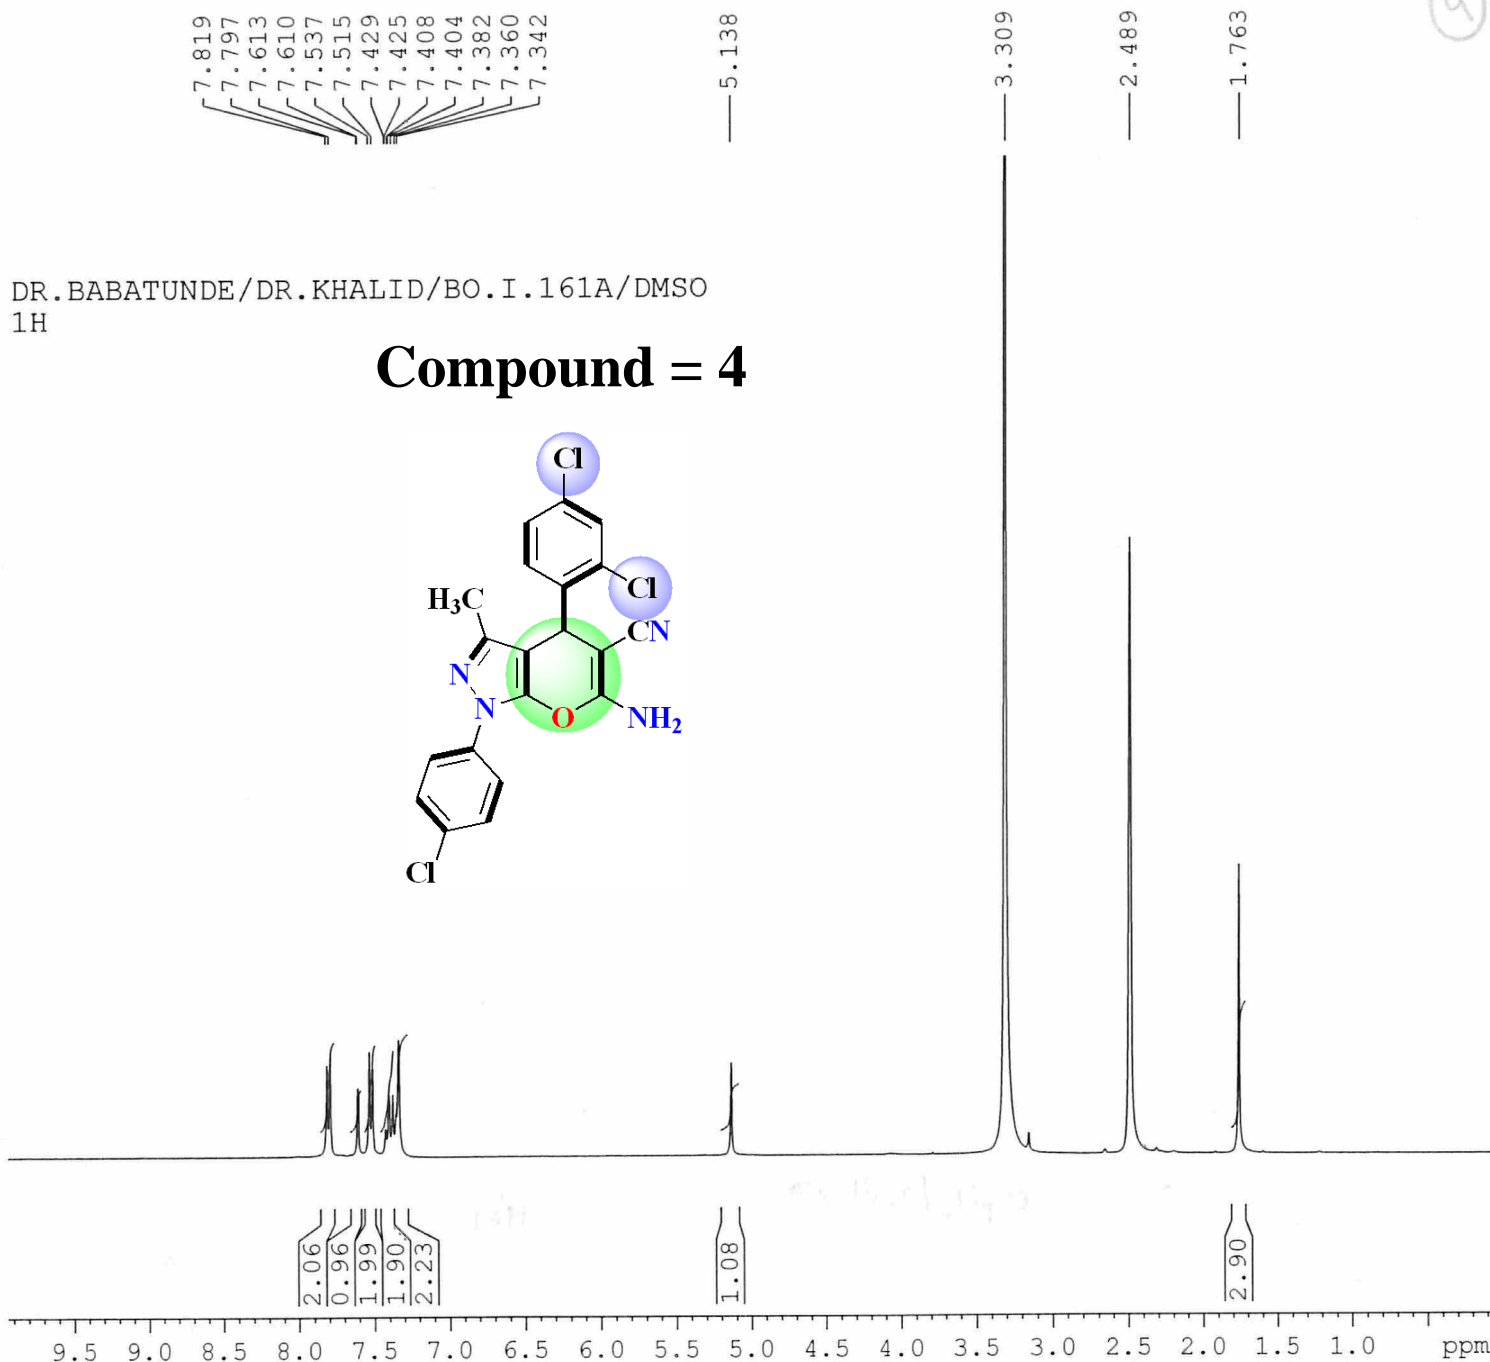

AVANCE NEO 400 MHz  
Lab # 115

Current Data Parameters  
NAME mar11-19  
EXPNO 2  
PROCNO 1

F2 - Acquisition Parameters  
Date\_ 20190311  
Time\_ 15.38 h  
INSTRUM AVNeo\_400  
PROBHD Z3756\_0202 (PH)  
PULPROG zg30  
TD 32768  
SOLVENT DMSO  
NS 64  
DS 0  
SWH 7812.500 Hz  
FIDRES 0.476837 Hz  
AQ 2.0971520 sec  
RG 101  
DW 64.000 usec  
DE 6.50 usec  
TE 300.0 K  
D1 1.50000000 sec  
TD0 1  
SFO1 399.9331994 MHz  
NUC1 1H  
P0 5.00 usec  
P1 15.00 usec  
PLW1 8.02390003 W

F2 - Processing parameters  
SI 32768  
SF 399.9300072 MHz  
WDW EM  
SSB 0  
LB 0.30 Hz  
GB 0  
PC 1.00

DR.O.BABATUNDE/DR.KHALID/BO-I-169a/DMSO  
1H

5

**AVANCE NEO**  
**400 MHz**  
**LAB# 117**

Current Data Parameters  
NAME mar15-19  
EXPNO 5  
PROCNO 1

F2 - Acquisition Parameters  
Date\_ 20190315  
Time\_ 12.17 h  
INSTRUM Avance NEO 400MHz  
PROBHD Z114854\_0013 (  
PULPROG zg30  
TD 65536  
SOLVENT DMSO  
NS 64  
DS 0  
SWH 8196.722 Hz  
FIDRES 0.250144 Hz  
AQ 3.9976959 sec  
RG 101  
DW 61.000 usec  
DE 12.86 usec  
TE 300.0 K  
D1 1.50000000 sec  
TD0 1  
SFO1 400.1332010 MHz  
NUC1 1H  
P0 4.67 usec  
P1 14.00 usec  
PLW1 13.21300030 W

F2 - Processing parameters  
SI 32768  
SF 400.1300071 MHz  
WDW EM  
SSB 0  
LB 0.30 Hz  
GB 0  
PC 1.00

**Compound = 5**

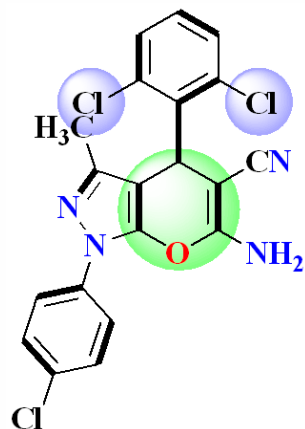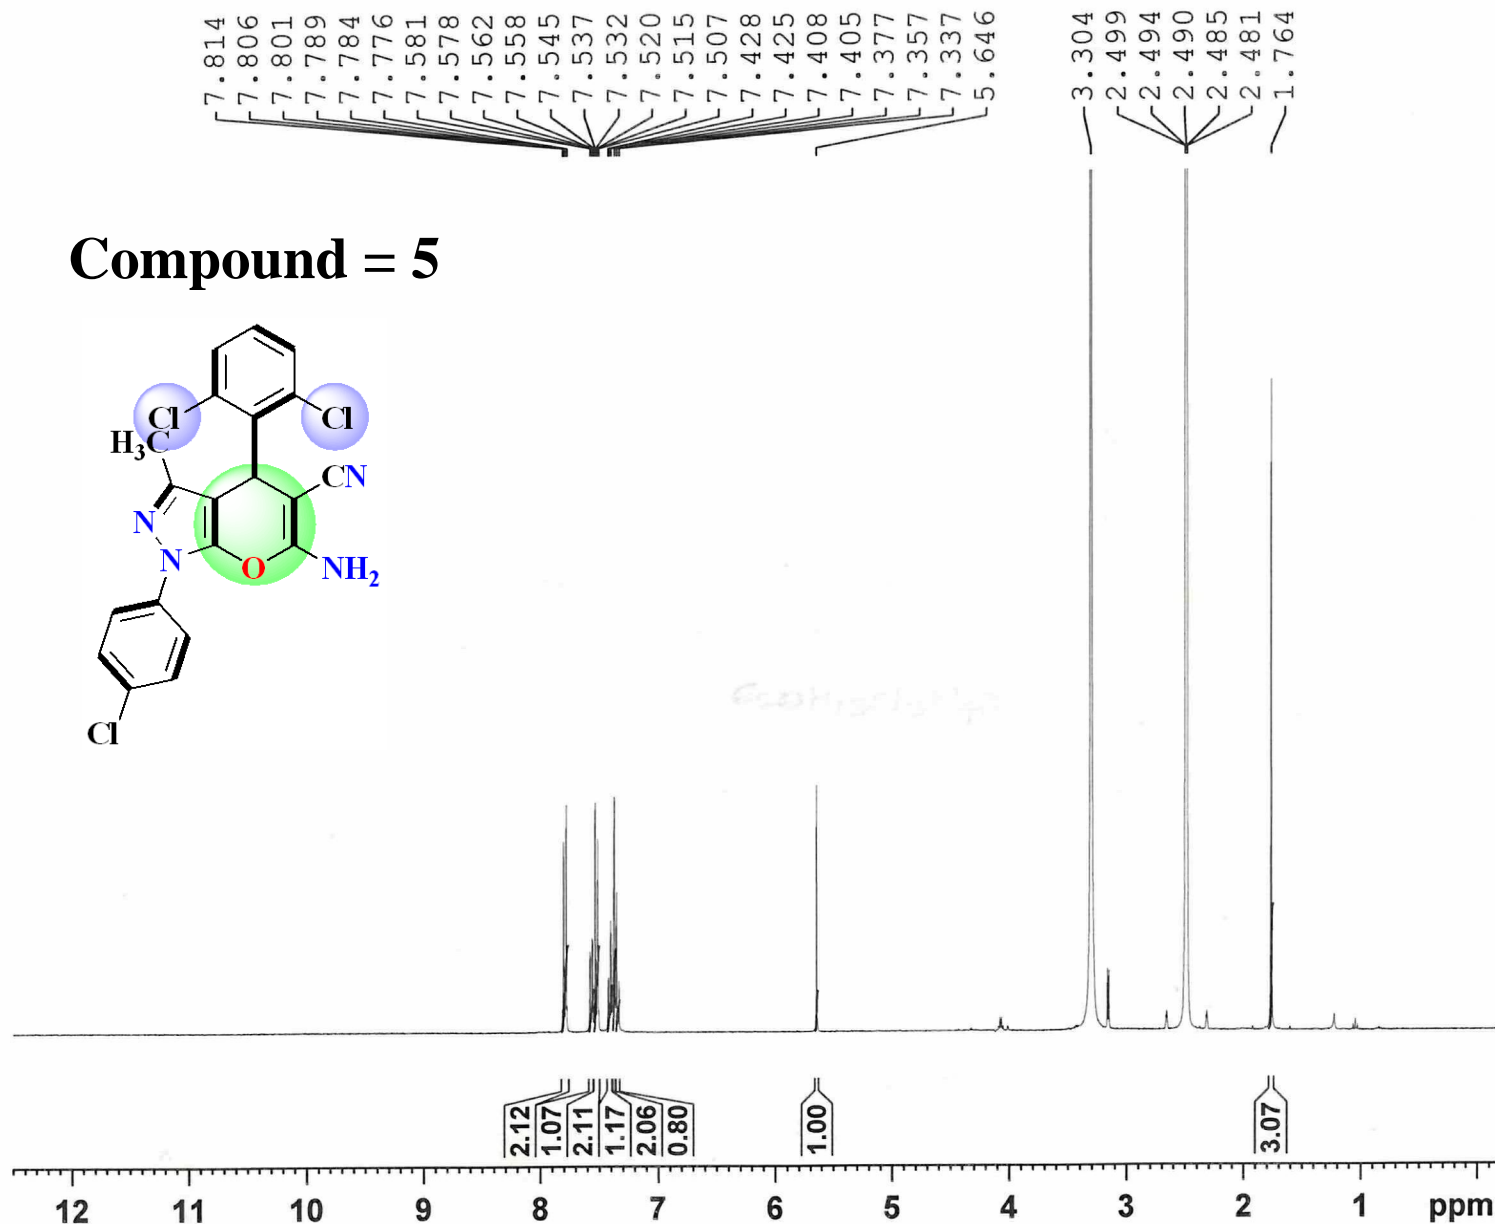

Dr. Babatumde / Dr. Khalid / BO-II.17A  
300 K  
1H

# Compound = 6

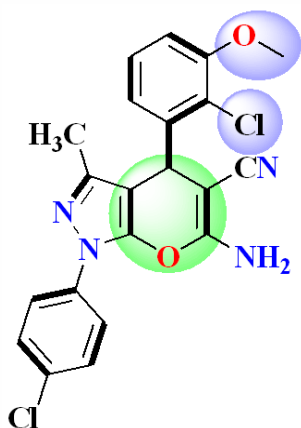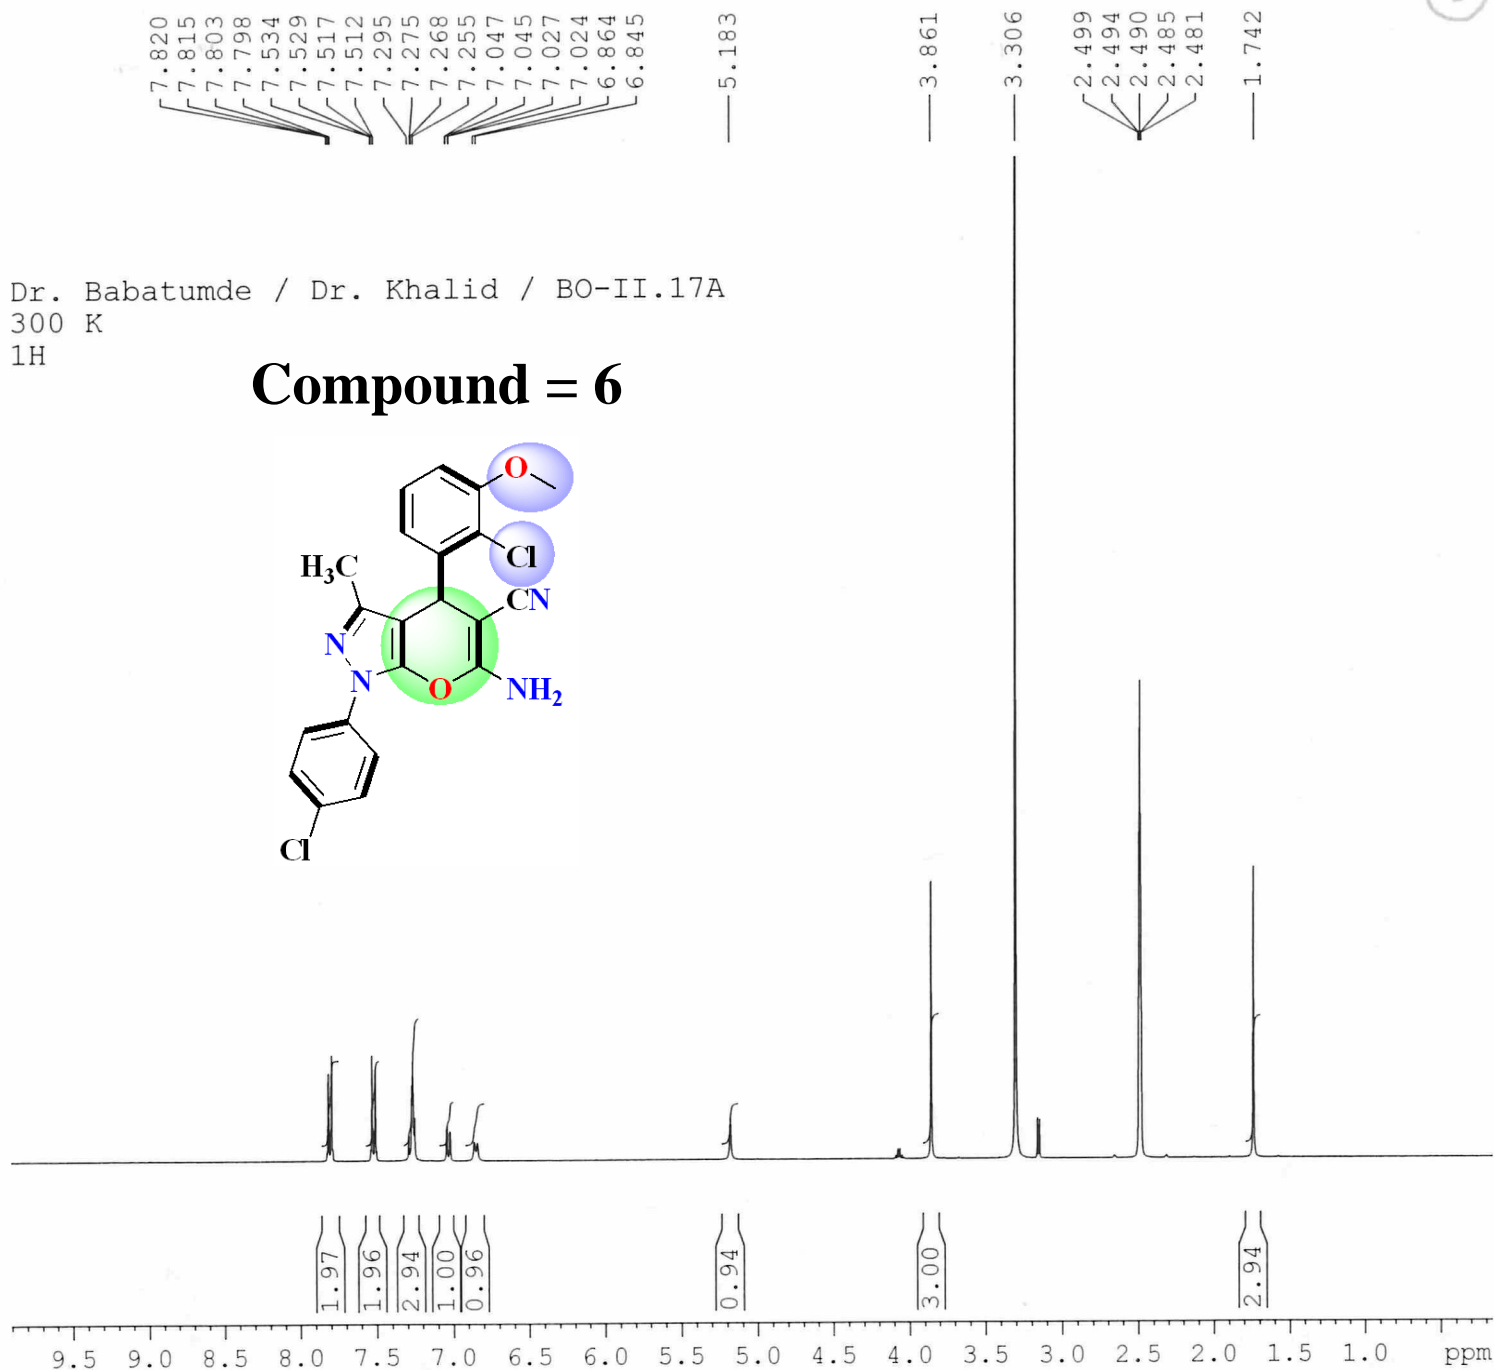

AVANCE NEO 400 MHz  
Lab # 115

Current Data Parameters  
NAME apr11-19  
EXPNO 2  
PROCNO 1

F2 - Acquisition Parameters  
Date\_ 20190411  
Time\_ 11.54 h  
INSTRUM AVNeo\_400  
PROBHD z3756\_0202 (PH  
PULPROG zg30  
TD 32768  
SOLVENT DMSO  
NS 64  
DS 0  
SWH 7812.500 Hz  
FIDRES 0.476837 Hz  
AQ 2.0971520 sec  
RG 101  
DW 64.000 usec  
DE 6.50 usec  
TE 300.0 K  
D1 1.50000000 sec  
TD0 1  
SFO1 399.9331994 MHz  
NUC1 1H  
P0 5.00 usec  
P1 15.00 usec  
PLW1 8.02390003 W

F2 - Processing parameters  
SI 32768  
SF 399.930073 MHz  
WDW EM  
SSB 0  
LB 0.30 Hz  
GB 0  
PC 1.00



1

AVANCE NEO 400 MHz  
Lab # 115

Current Data Parameters  
NAME mar25-19  
EXPNO 11  
PROCNO 1

F2 - Acquisition Parameters  
Date\_ 20190325  
Time\_ 15.10 h  
INSTRUM AVNeo\_400  
PROBHD Z3756\_0202 (PH  
PULPROG zg30  
TD 32768  
SOLVENT DMSO  
NS 64  
DS 0  
SWH 7812.500 Hz  
FIDRES 0.476837 Hz  
AQ 2.0971520 sec  
RG 101  
DW 64.000 usec  
DE 6.50 usec  
TE 300.0 K  
D1 1.50000000 sec  
TD0 1  
SF01 399.9331994 MHz  
NUC1 1H  
P0 5.00 usec  
P1 15.00 usec  
PLW1 8.02390003 W

F2 - Processing parameters  
SI 32768  
SF 399.9300073 MHz  
WDW EM  
SSB 0  
LB 0.30 Hz  
GB 0  
PC 1.00

DR. BABATUNDE/DR. KHALID/BO. I. 183A/DMSO  
300 K  
1H

Compound = 7

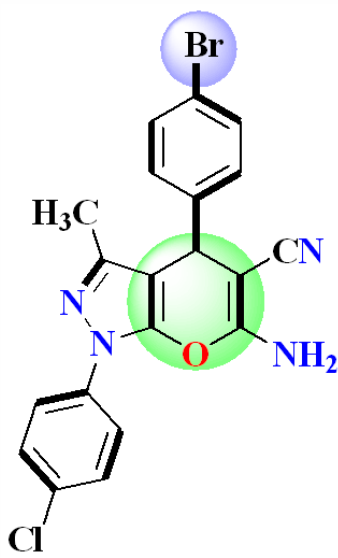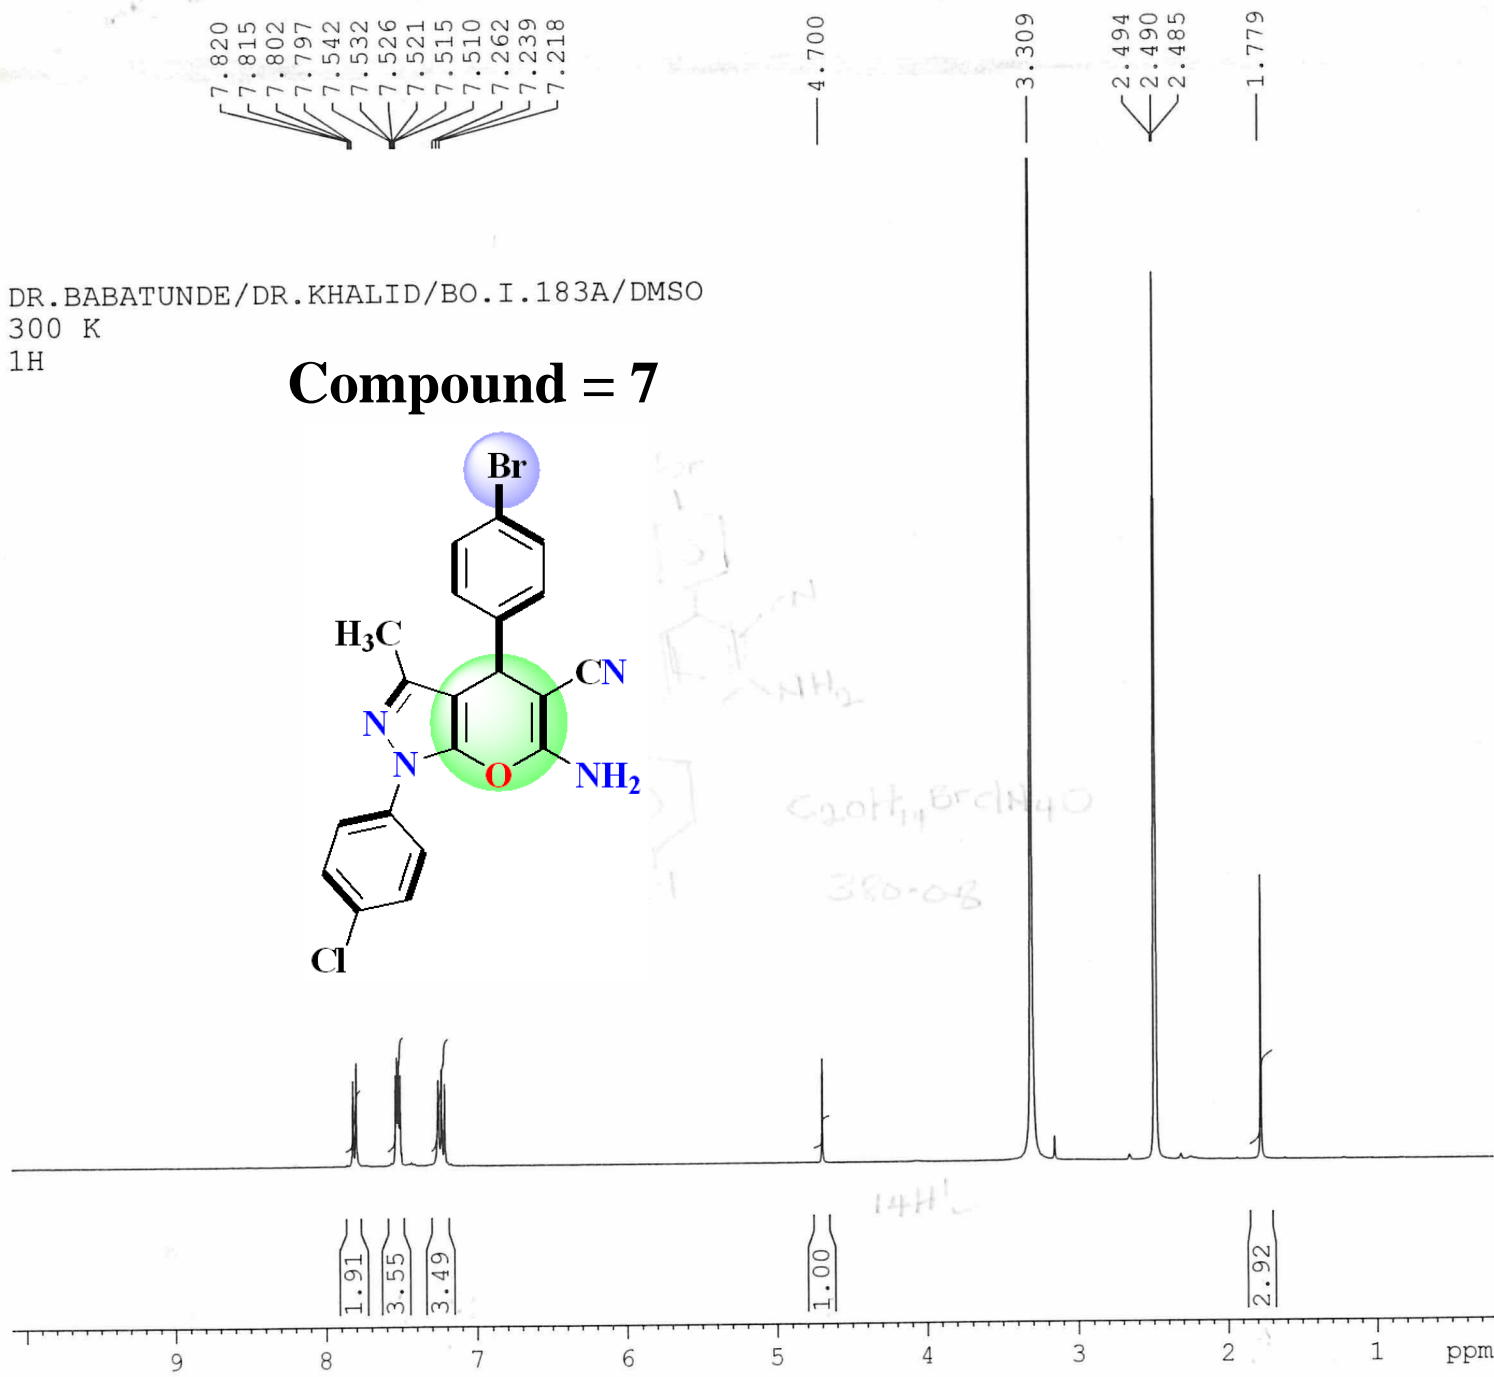

8

7.823  
7.818  
7.806  
7.800  
7.557  
7.550  
7.536  
7.524  
7.519  
7.514  
7.507  
7.503  
7.497  
7.354  
7.229  
7.207  
7.203  
7.182

4.957

3.311

2.498  
2.494  
2.489  
2.485  
2.481

1.818

AVANCE NEO 400 MHz  
Lab # 115

DR.BABATUNDE/DR.KHALID/BO.I.185A/DMSO  
300 K  
1H

Compound = 8

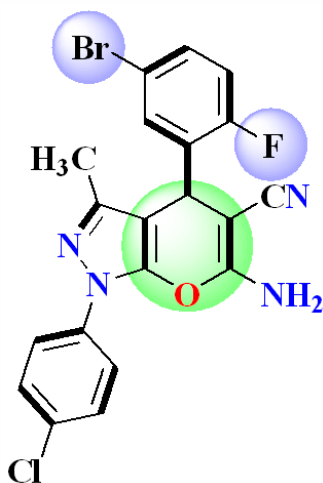

Current Data Parameters  
NAME mar25-19  
EXPNO 12  
PROCNO 1

F2 - Acquisition Parameters  
Date\_ 20190325  
Time 15.22 h  
INSTRUM AVNeo\_400  
PROBHD Z3756\_0202 (PH  
PULPROG zg30  
TD 32768  
SOLVENT DMSO  
NS 64  
DS 0  
SWH 7812.500 Hz  
FIDRES 0.476837 Hz  
AQ 2.0971520 sec  
RG 101  
DW 64.000 usec  
DE 6.50 usec  
TE 300.0 K  
D1 1.50000000 sec  
TD0 1  
SF01 399.9331994 MHz  
NUC1 1H  
P0 5.00 usec  
P1 15.00 usec  
PLW1 8.02390003 W

F2 - Processing parameters  
SI 32768  
SF 399.9300073 MHz  
WDW EM  
SSB 0  
LB 0.30 Hz  
GB 0  
PC 1.00

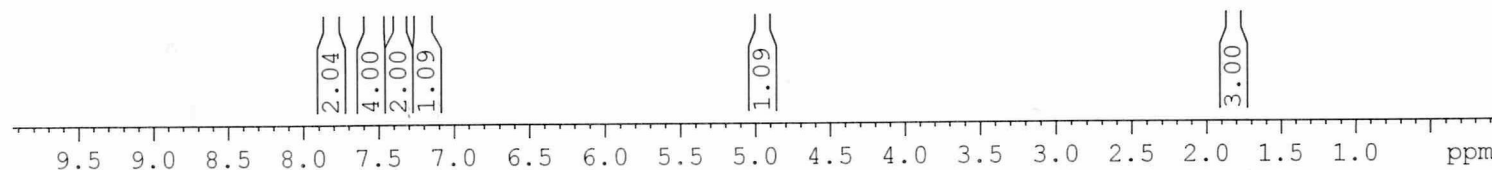



Dr. Babatumde / Dr. Khalid / BO-II.15A  
300 K  
1H

# Compound = 9

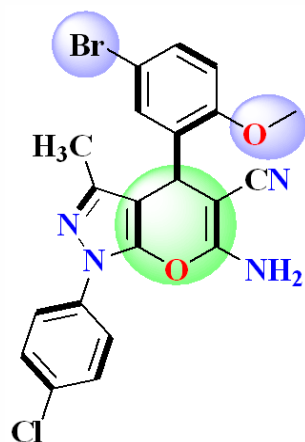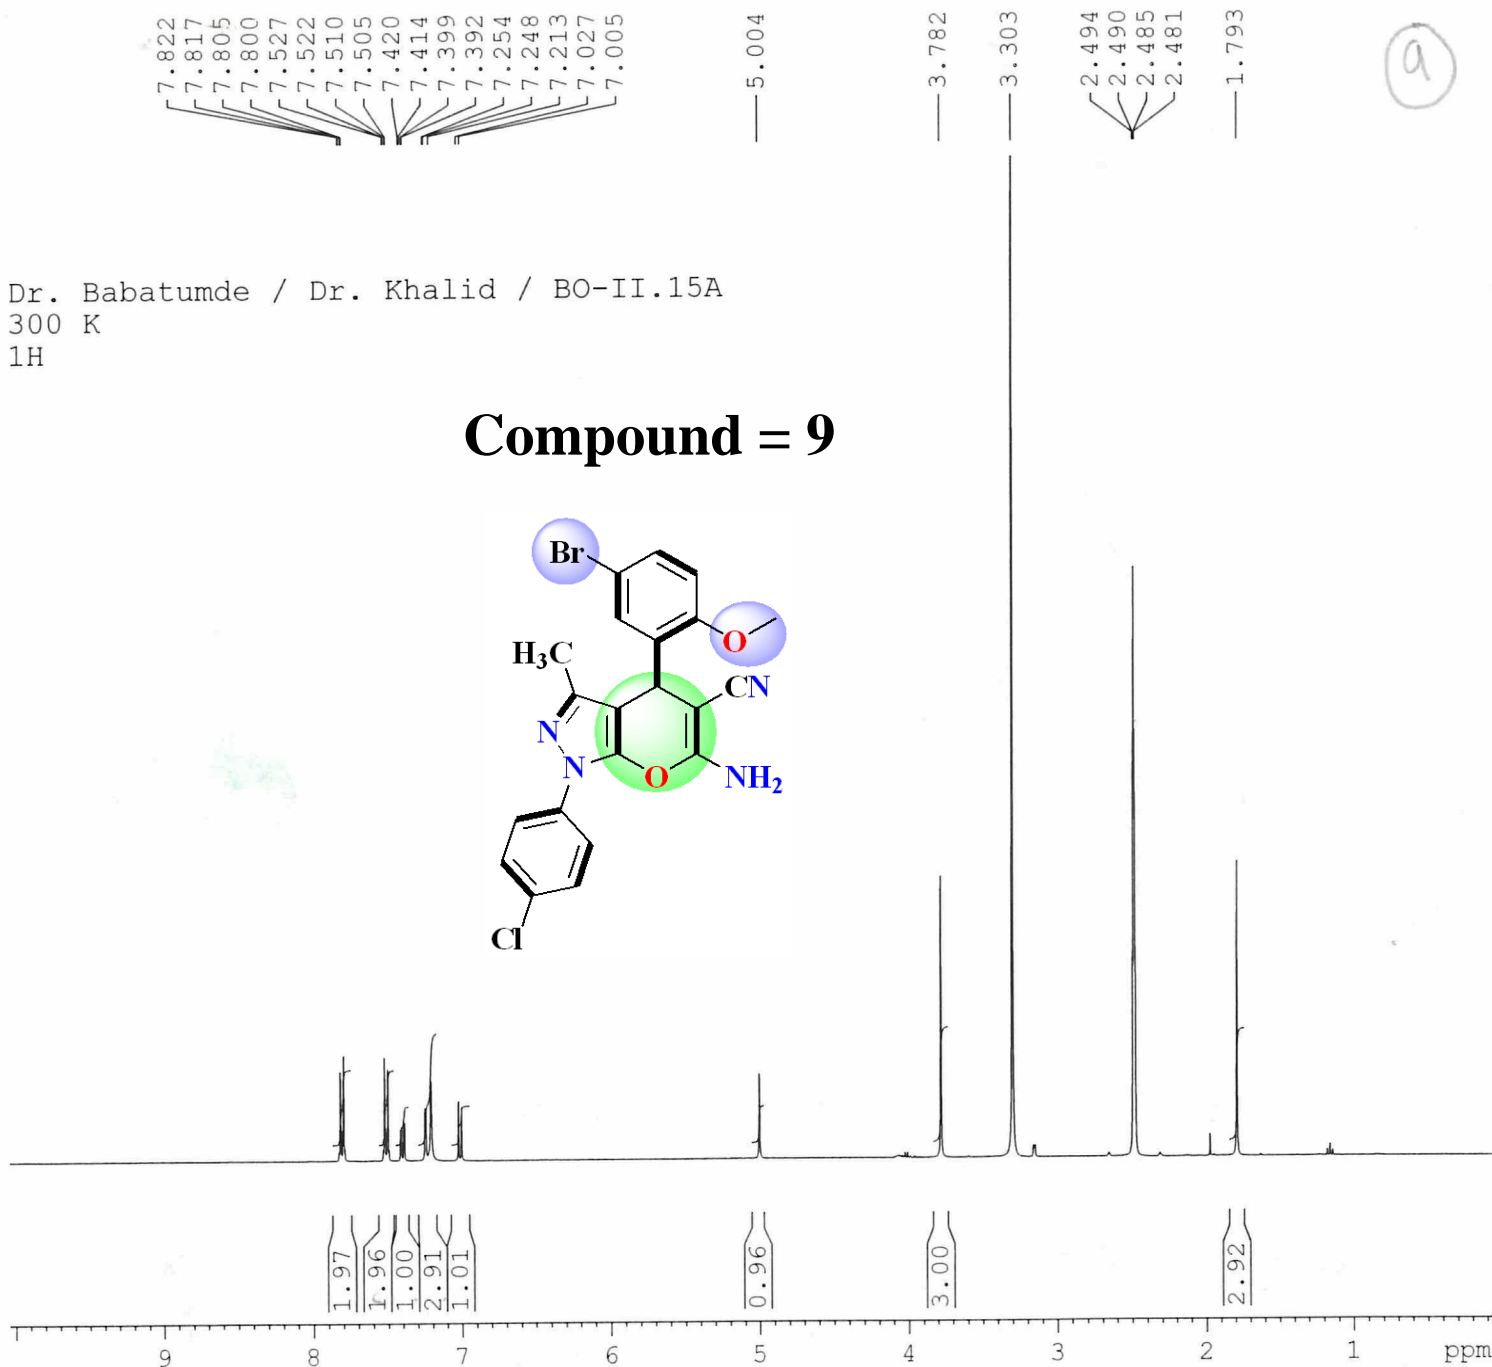

AVANCE NEO 400 MHz  
Lab # 115

Current Data Parameters  
NAME apr11-19  
EXPNO 5  
PROCNO 1

F2 - Acquisition Parameters  
Date\_ 20190411  
Time 12.28 h  
INSTRUM AVNeo\_400  
PROBHD z3756\_0202 (PH  
PULPROG zg30  
TD 32768  
SOLVENT DMSO  
NS 64  
DS 0  
SWH 7812.500 Hz  
FIDRES 0.476837 Hz  
AQ 2.0971520 sec  
RG 101  
DW 64.000 usec  
DE 6.50 usec  
TE 300.0 K  
D1 1.50000000 sec  
TD0 1  
SFO1 399.9331994 MHz  
NUC1 1H  
P0 5.00 usec  
P1 15.00 usec  
PLW1 8.02390003 W

F2 - Processing parameters  
SI 32768  
SF 399.9300073 MHz  
WDW EM  
SSB 0  
LB 0.30 Hz  
GB 0  
PC 1.00

DR.BABATUNDE/DR.KHALID/BO.II.197A/DMSO  
300 K  
1H

**Compound = 10**

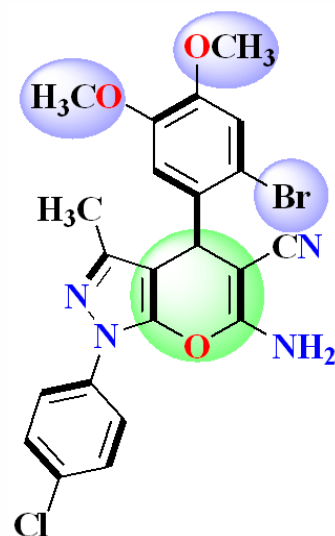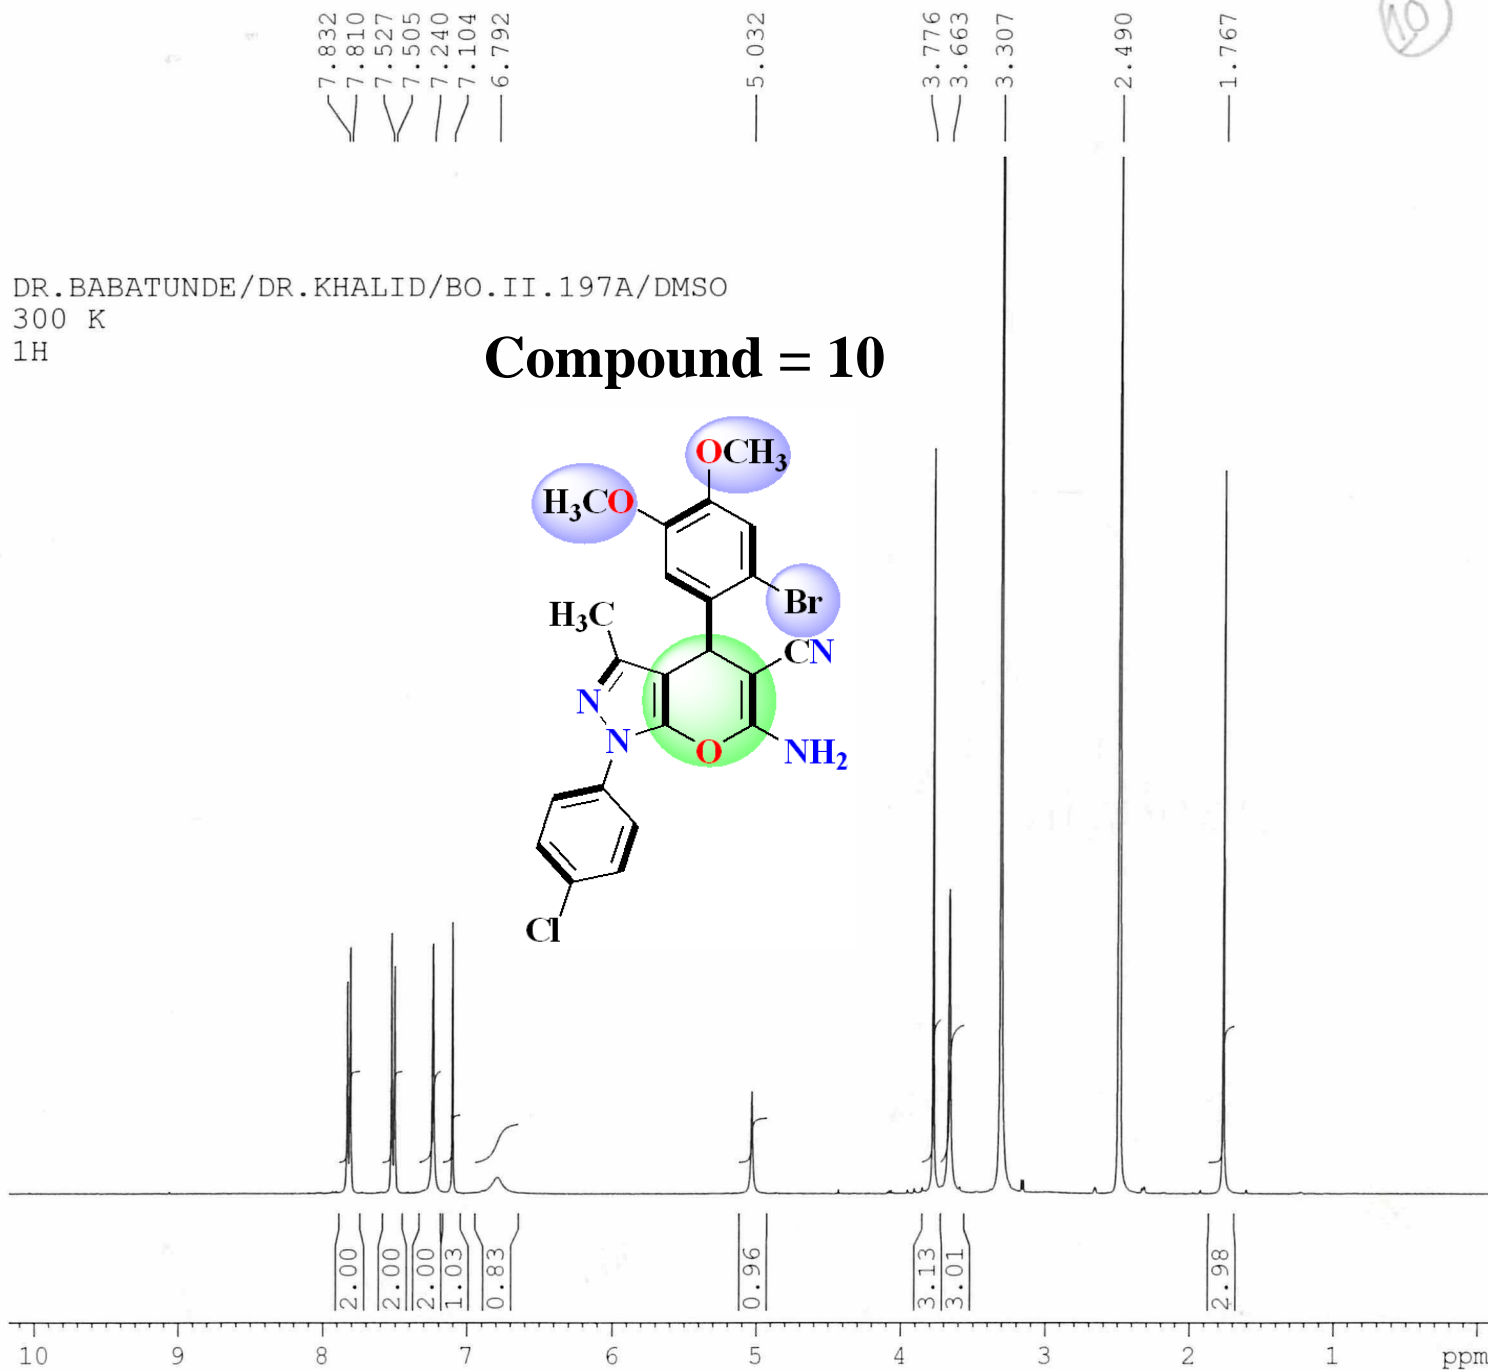

AVANCE NEO 400 MHz  
Lab # 115

Current Data Parameters  
NAME apr09-19  
EXPNO 4  
PROCNO 1

F2 - Acquisition Parameters  
Date\_ 20190409  
Time\_ 12.51 h  
INSTRUM AVNeo\_400  
PROBHD Z3756\_0202 (PH  
PULPROG zg30  
TD 32768  
SOLVENT DMSO  
NS 32  
DS 0  
SWH 7812.500 Hz  
FIDRES 0.476837 Hz  
AQ 2.0971520 sec  
RG 101  
DW 64.000 usec  
DE 6.50 usec  
TE 300.0 K  
D1 1.50000000 sec  
TD0 1  
SFO1 399.9331994 MHz  
NUC1 1H  
P0 5.00 usec  
P1 15.00 usec  
PLW1 8.02390003 W

F2 - Processing parameters  
SI 32768  
SF 399.9300073 MHz  
WDW EM  
SSB 0  
LB 0.30 Hz  
GB 0  
PC 1.00

Dr. Babatumde / Dr. Khalid / BO-II.19A

300 K

<sup>1</sup>H

**Compound = 11**

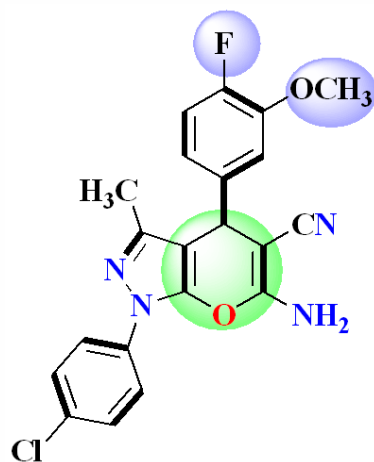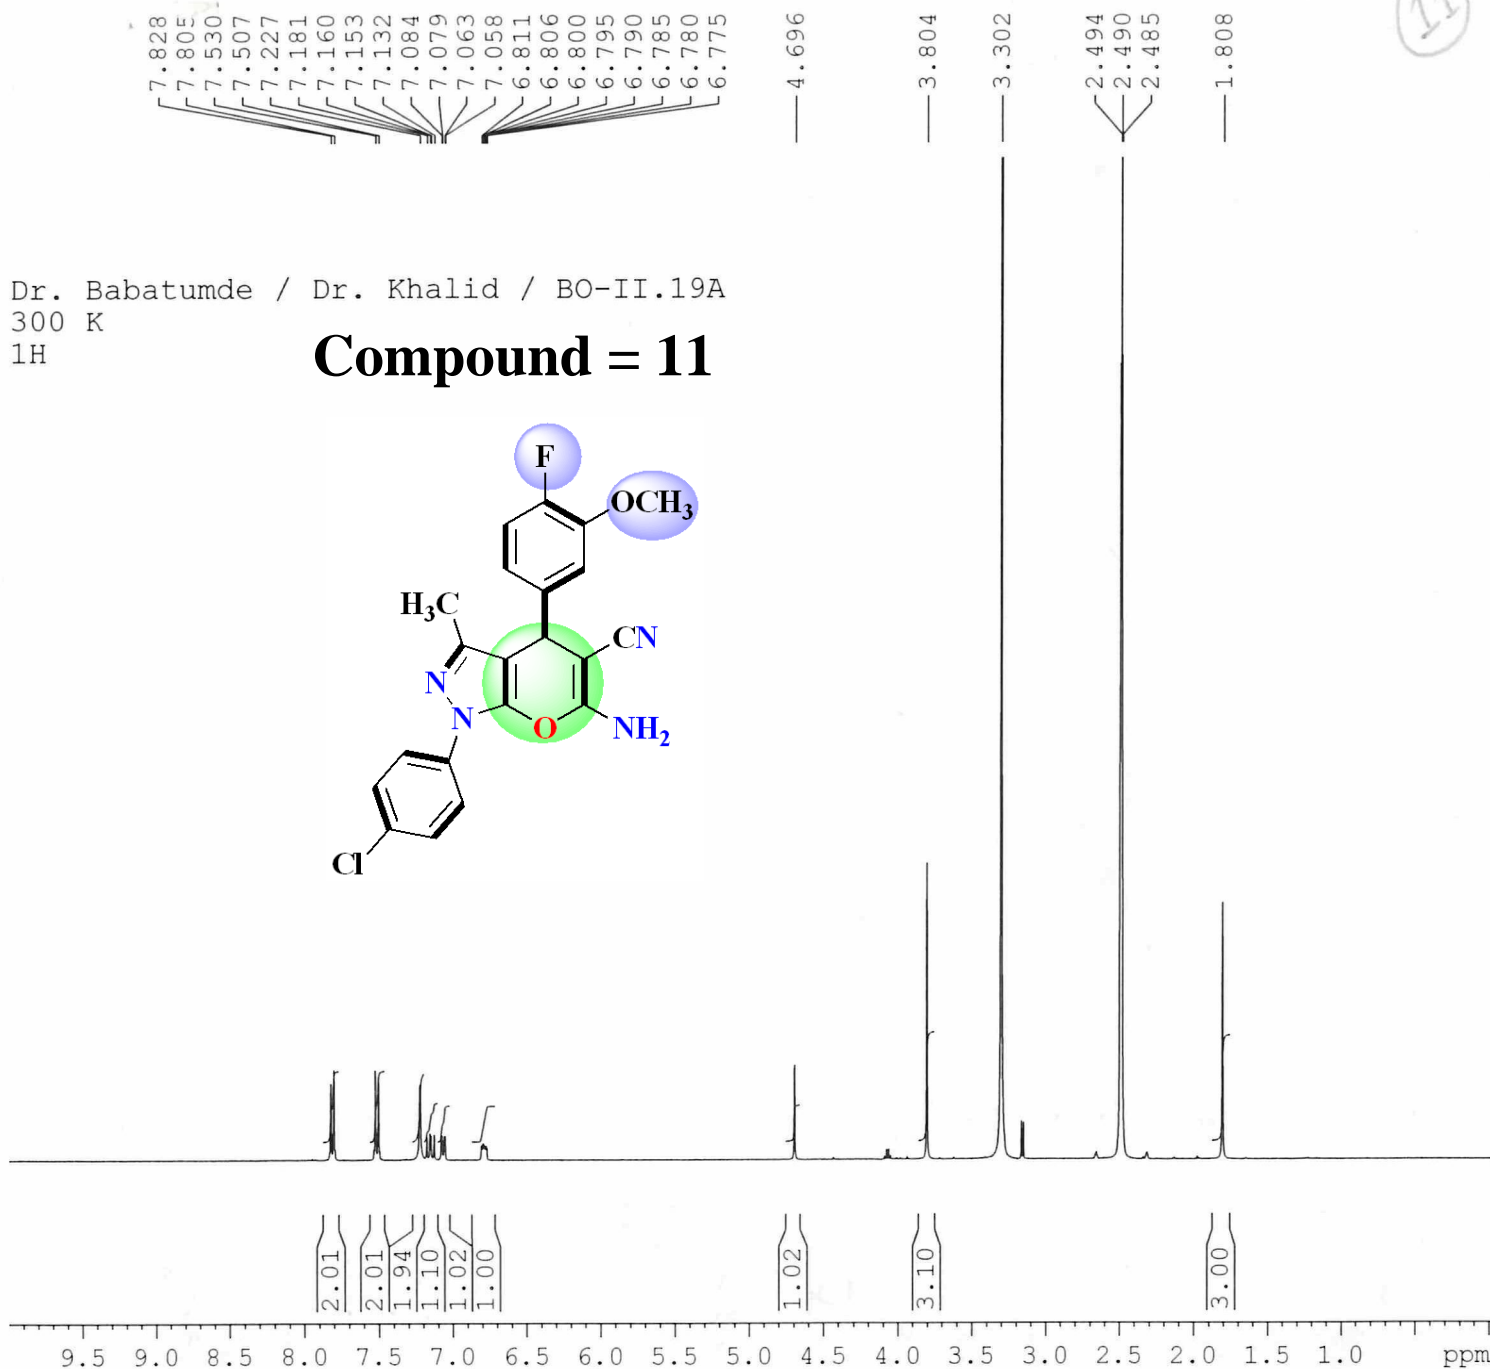

AVANCE NEO 400 MHz  
Lab # 115

Current Data Parameters  
NAME apr11-19  
EXPNO 3  
PROCNO 1

F2 - Acquisition Parameters  
Date\_ 20190411  
Time\_ 12.01 h  
INSTRUM AVNeo\_400  
PROBHD Z3756\_0202 (PH  
PULPROG zg30  
TD 32768  
SOLVENT DMSO  
NS 64  
DS 0  
SWH 7812.500 Hz  
FIDRES 0.476837 Hz  
AQ 2.0971520 sec  
RG 101  
DW 64.000 usec  
DE 6.50 usec  
TE 300.0 K  
D1 1.50000000 sec  
TD0 1  
SFO1 399.9331994 MHz  
NUC1 1H  
P0 5.00 usec  
P1 15.00 usec  
PLW1 8.02390003 W

F2 - Processing parameters  
SI 32768  
SF 399.9300073 MHz  
WDW EM  
SSB 0  
LB 0.30 Hz  
GB 0  
PC 1.00

12

AVANCE NEO 400 MHz  
Lab # 115

Current Data Parameters  
NAME apr11-19  
EXPNO 1  
PROCNO 1

F2 - Acquisition Parameters  
Date\_ 20190411  
Time 11.48 h  
INSTRUM AVNeo\_400  
PROBHD z3756\_0202 (PH  
PULPROG zg30  
TD 32768  
SOLVENT DMSO  
NS 64  
DS 0  
SWH 7812.500 Hz  
FIDRES 0.476837 Hz  
AQ 2.0971520 sec  
RG 101  
DW 64.000 usec  
DE 6.50 usec  
TE 300.0 K  
D1 1.50000000 sec  
TD0 1  
SFO1 399.9331994 MHz  
NUC1 1H  
PO 5.00 usec  
P1 15.00 usec  
PLW1 8.02390003 W

F2 - Processing parameters  
SI 32768  
SF 399.9300073 MHz  
WDW EM  
SSB 0  
LB 0.30 Hz  
GB 0  
PC 1.00

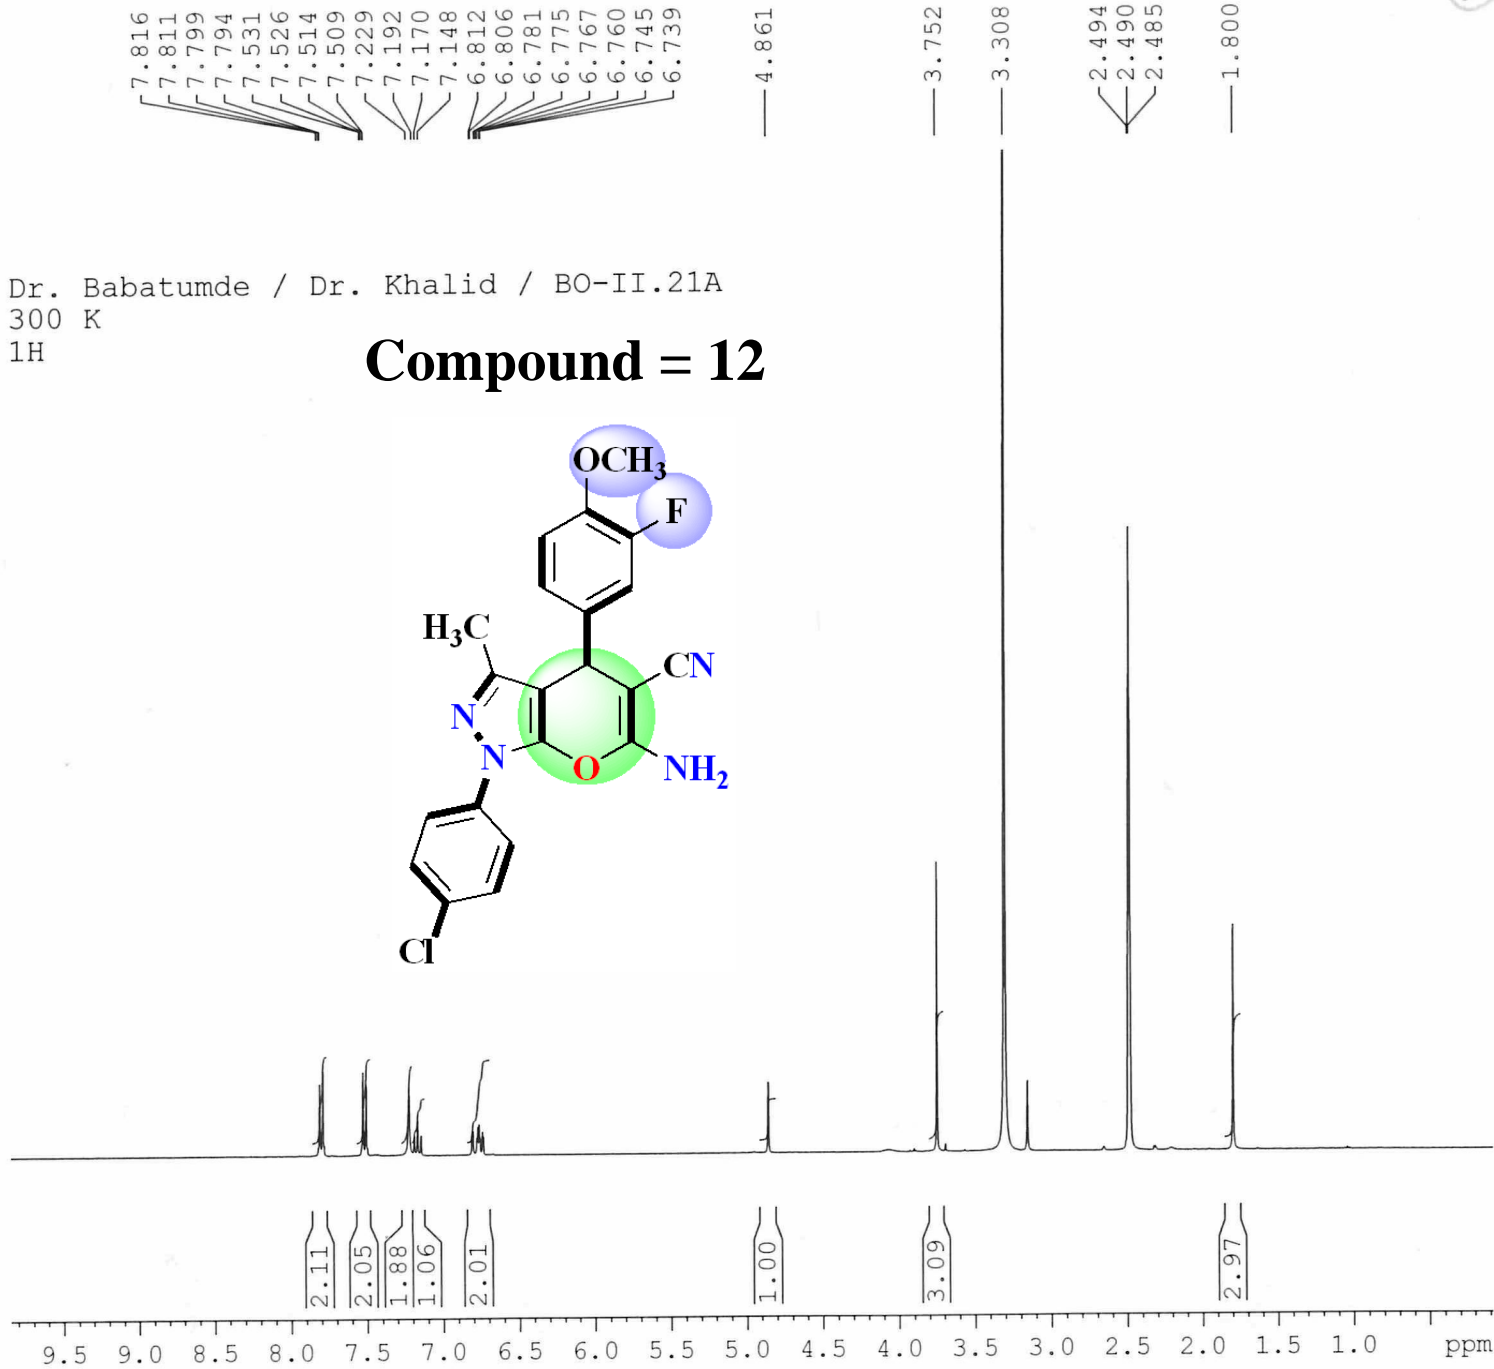

DR. BABATUNDE/DR. KHALID/BO. I. 157A/DMSO  
1H

**Compound = 13**

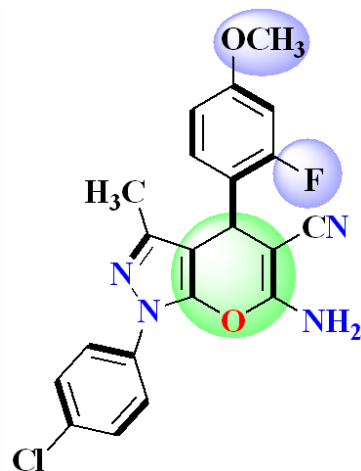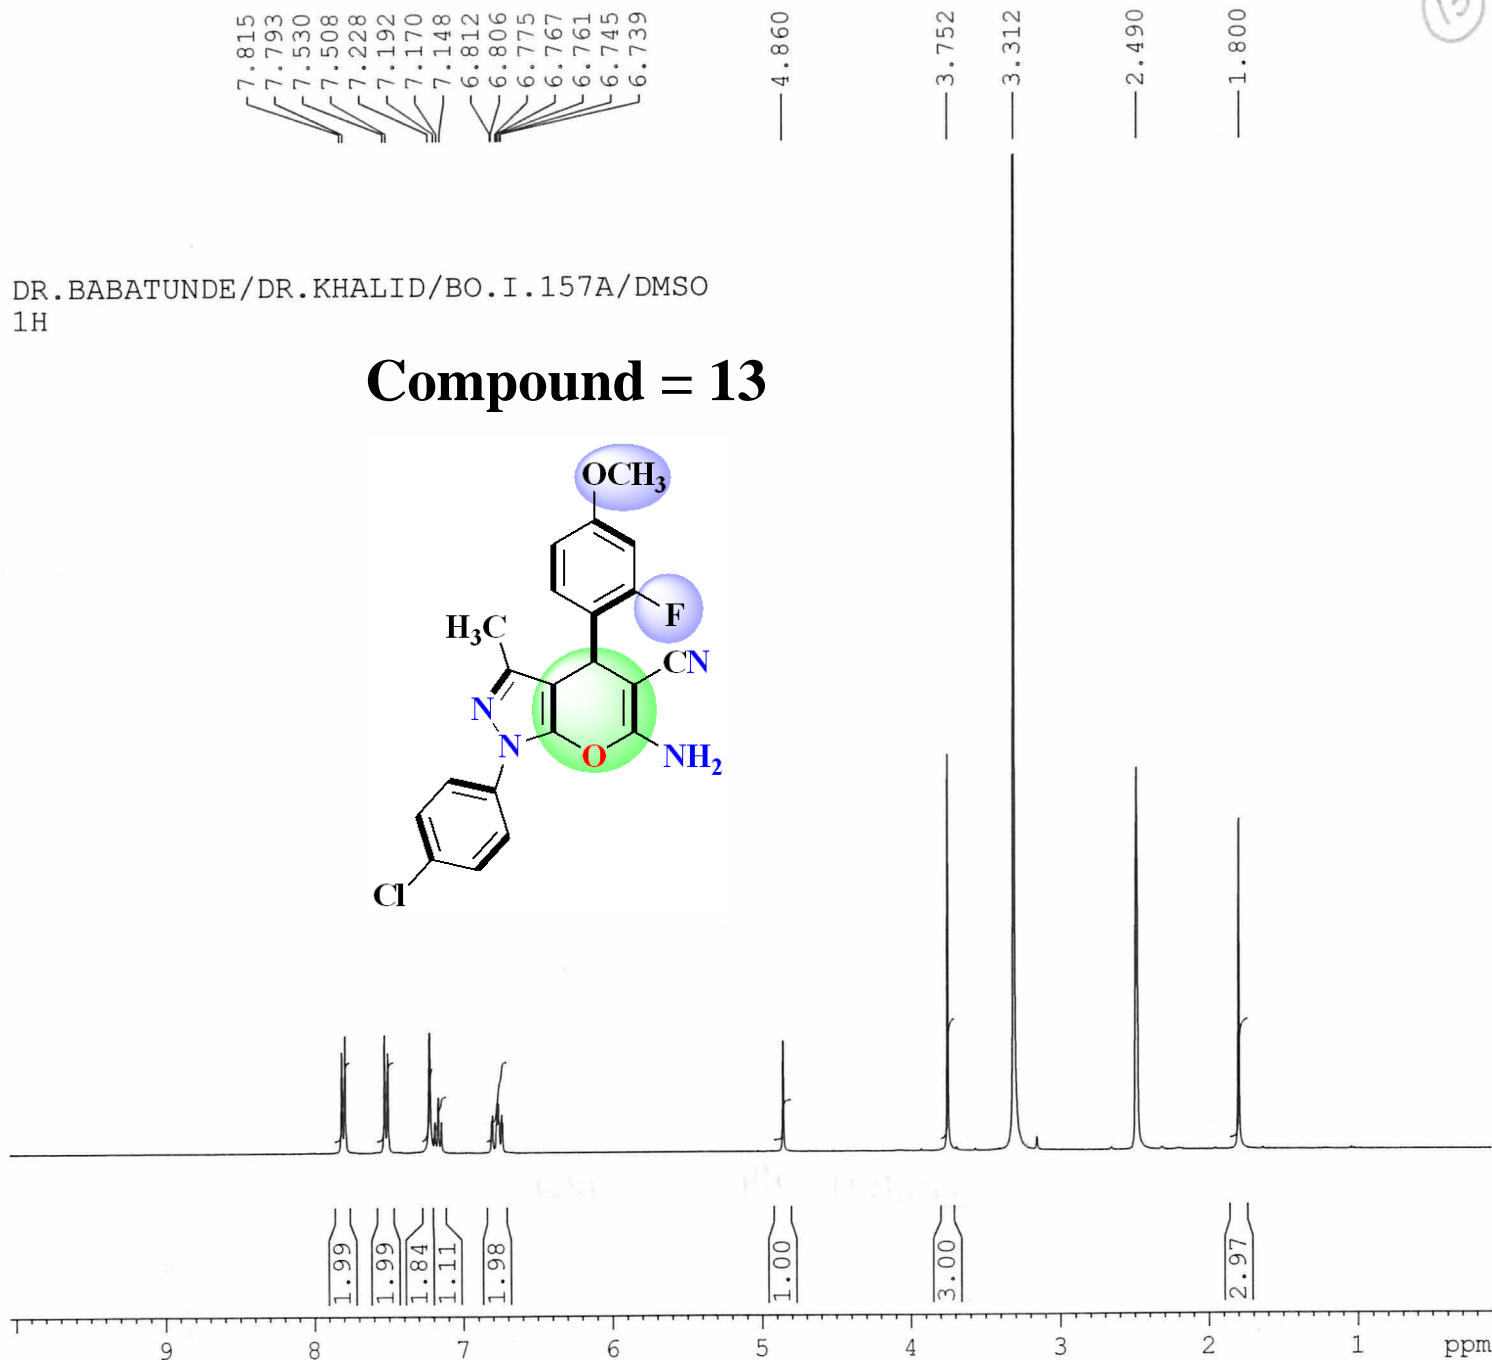

AVANCE NEO 400 MHz  
Lab # 115

Current Data Parameters  
NAME mar11-19  
EXPNO 1  
PROCNO 1

F2 - Acquisition Parameters  
Date\_ 20190311  
Time\_ 15.15 h  
INSTRUM AVNeo\_400  
PROBHD z3756\_0202 (PH  
PULPROG zg30  
TD 32768  
SOLVENT DMSO  
NS 64  
DS 0  
SWH 7812.500 Hz  
FIDRES 0.476837 Hz  
AQ 2.0971520 sec  
RG 101  
DW 64.000 usec  
DE 6.50 usec  
TE 300.0 K  
D1 1.50000000 sec  
TD0 1  
SFO1 399.9331994 MHz  
NUC1 1H  
P0 5.00 usec  
P1 15.00 usec  
PLW1 8.02390003 W

F2 - Processing parameters  
SI 32768  
SF 399.9300071 MHz  
WDW EM  
SSB 0  
LB 0.30 Hz  
GB 0  
PC 1.00

AVANCE NEO 400 MHz  
Lab # 115

Current Data Parameters  
NAME apr09-19  
EXPNO 3  
PROCNO 1

F2 - Acquisition Parameters  
Date\_ 20190409  
Time\_ 12.45 h  
INSTRUM AVNeo\_400  
PROBHD Z3756\_0202 (PH  
PULPROG zg30  
TD 32768  
SOLVENT DMSO  
NS 32  
DS 0  
SWH 7812.500 Hz  
FIDRES 0.476837 Hz  
AQ 2.0971520 sec  
RG 101  
DW 64.000 usec  
DE 6.50 usec  
TE 300.0 K  
D1 1.50000000 sec  
TD0 1  
SFO1 399.9331994 MHz  
NUC1 1H  
P0 5.00 usec  
P1 15.00 usec  
PLW1 8.02390003 W

F2 - Processing parameters  
SI 32768  
SF 399.9300073 MHz  
WDW EM  
SSB 0  
LB 0.30 Hz  
GB 0  
PC 1.00

DR.BABATUNDE/DR.KHALID/BO.II.193A/DMSO

300 K

1H

Compound = 14

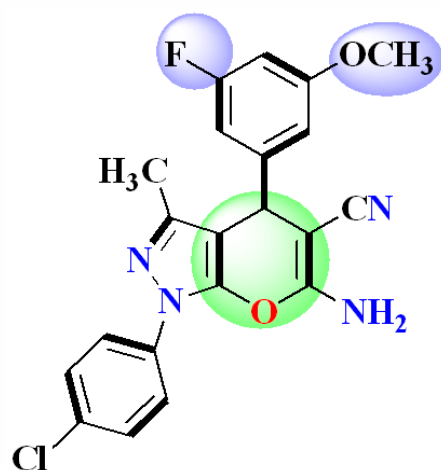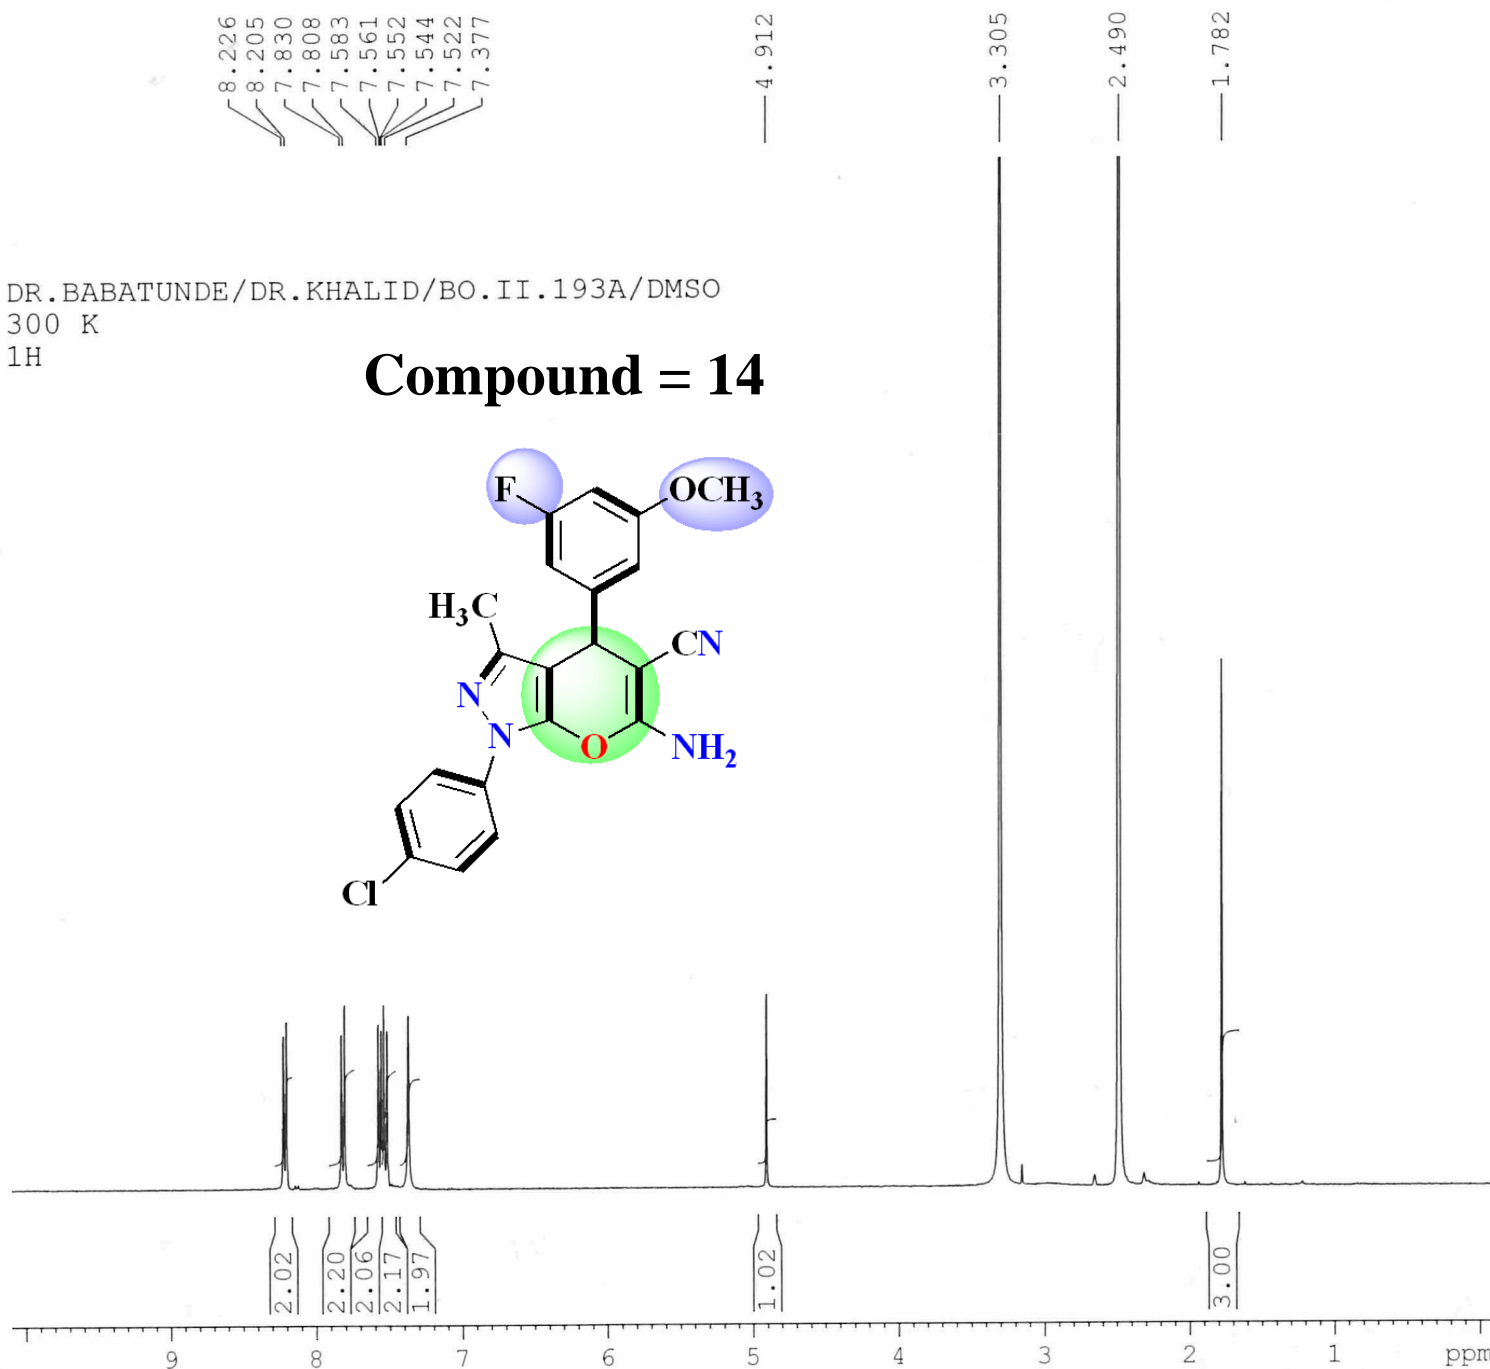



Dr. Babatumde / Dr. Khalid / BO-II.23A  
300 K  
1H

# Compound = 15

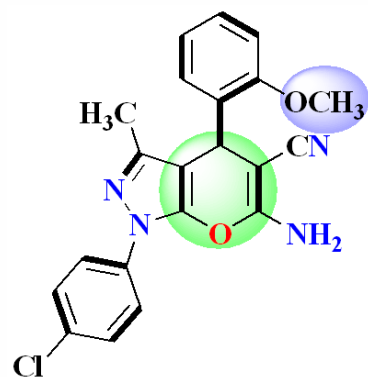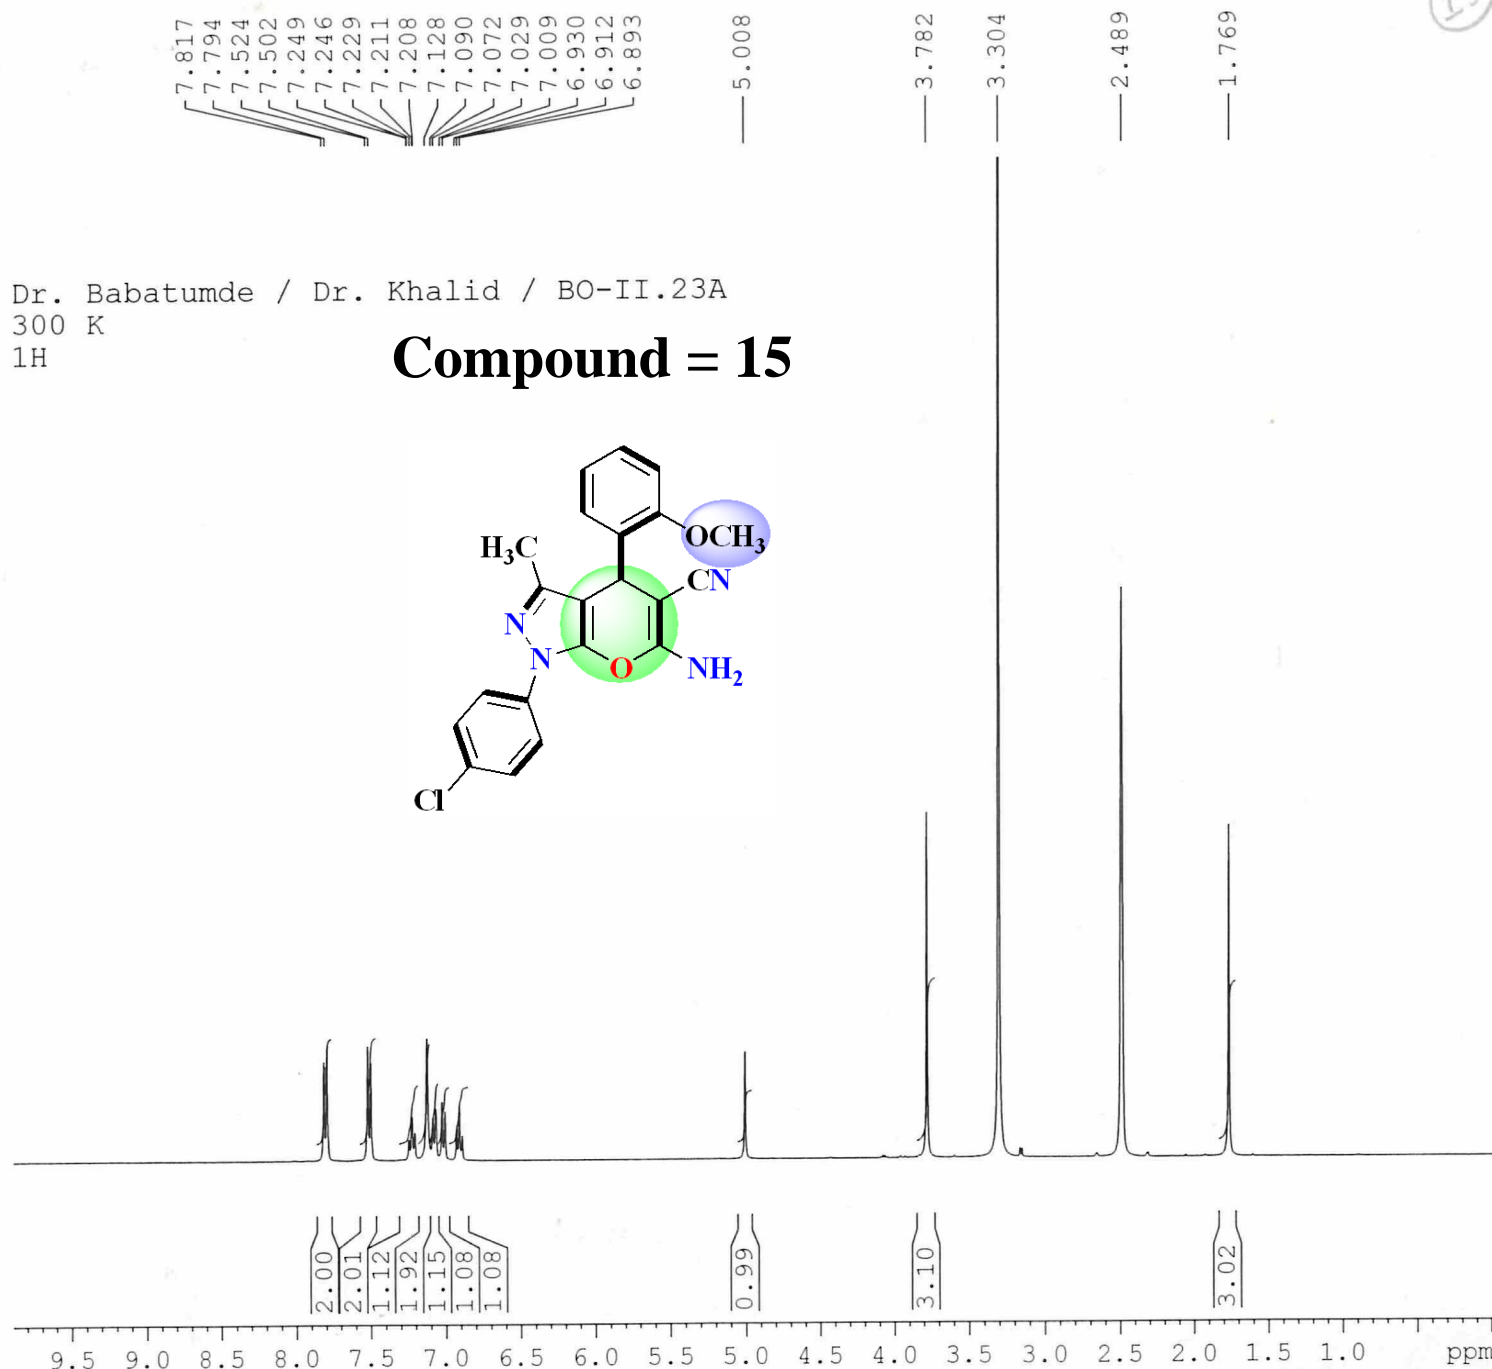

AVANCE NEO 400 MHz  
Lab # 115

Current Data Parameters  
NAME apr11-19  
EXPNO 9  
PROCNO 1

F2 - Acquisition Parameters  
Date\_ 20190411  
Time\_ 15.09 h  
INSTRUM AVNeo\_400  
PROBHD Z3756\_0202 (PH  
PULPROG zg30  
TD 32768  
SOLVENT DMSO  
NS 64  
DS 0  
SWH 7812.500 Hz  
FIDRES 0.476837 Hz  
AQ 2.0971520 sec  
RG 101  
DW 64.000 usec  
DE 6.50 usec  
TE 300.0 K  
D1 1.50000000 sec  
TD0 1  
SFO1 399.9331994 MHz  
NUC1 1H  
P0 5.00 usec  
P1 15.00 usec  
PLW1 8.02390003 W

F2 - Processing parameters  
SI 32768  
SF 399.9300073 MHz  
WDW EM  
SSB 0  
LB 0.30 Hz  
GB 0  
PC 1.00

DR.O.BABATUNDE/DR.KHALID/BO-1-181a/CDCL3  
1H

AVANCE NEO  
500 MHz  
LAB # 109-B

16

7.603  
7.597  
7.593  
7.583  
7.579  
7.574  
7.398  
7.393  
7.389  
7.379  
7.375  
7.369  
7.240  
7.172  
7.155  
7.138  
6.524  
5.366  
— 4.547  
3.753  
3.730  
3.464  
— 1.893  
— 1.561

**Compound = 16**

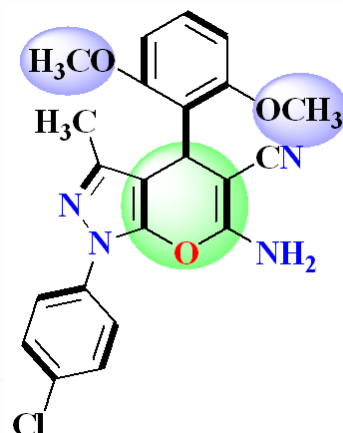

Current Data Parameters  
NAME apr01-19  
EXPNO 4  
PROCNO 1

F2 - Acquisition Parameters  
Date\_ 20190401  
Time\_ 12.01 h  
INSTRUM AVNeo500MHz  
PROBHD Z859201\_0007 (   
PULPROG zg30  
TD 65536  
SOLVENT CDCl3  
NS 16  
DS 0  
SWH 10000.000 Hz  
FIDRES 0.305176 Hz  
AQ 3.2767999 sec  
RG 101  
DW 50.000 usec  
DE 11.31 usec  
TE 298.0 K  
D1 1.50000000 sec  
TD0 1  
SFO1 500.1340010 MHz  
NUC1 1H  
P0 2.33 usec  
P1 7.00 usec  
PLW1 17.96400070 W

F2 - Processing parameters  
SI 32768  
SF 500.1300218 MHz  
WDW EM  
SSB 0  
LB 0.30 Hz  
GB 0  
PC 1.00

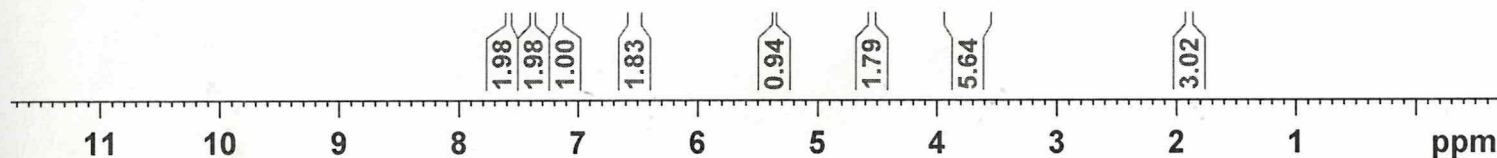

DR.O.BABATUNDE/DR.KHALID/BO-I-159a/DMSO  
1H

AVANCE NEO  
400 MHz  
LAB# 117

Current Data Parameters  
NAME mar15-19  
EXPNO 3  
PROCNO 1

F2 - Acquisition Parameters  
Date\_ 20190315  
Time\_ 11.32 h  
INSTRUM Avance NEO 400MHz  
PROBHD Z114854\_0013 (zg30)  
PULPROG 65536  
TD DMSO  
SOLVENT 128  
NS 0  
DS 8196.722 Hz  
SWH 0.250144 Hz  
FIDRES 3.9976959 sec  
AQ 101  
RG 61.000 usec  
DW 12.86 usec  
DE 300.0 K  
TE 1.50000000 sec  
D1 1  
TD0 400.1332010 MHz  
SFO1 1H  
NUC1 4.67 usec  
P0 14.00 usec  
P1 13.21300030 W  
PLW1

F2 - Processing parameters  
SI 32768  
SF 400.1300071 MHz  
WDW EM  
SSB 0  
LB 0.30 Hz  
GB 0  
PC 1.00

Compound = 17

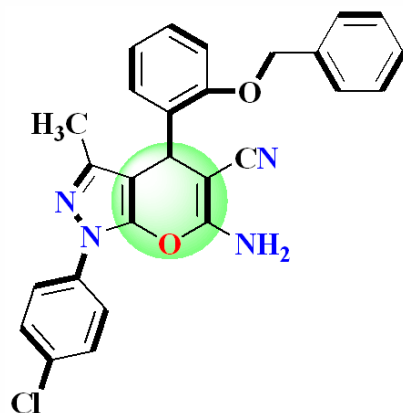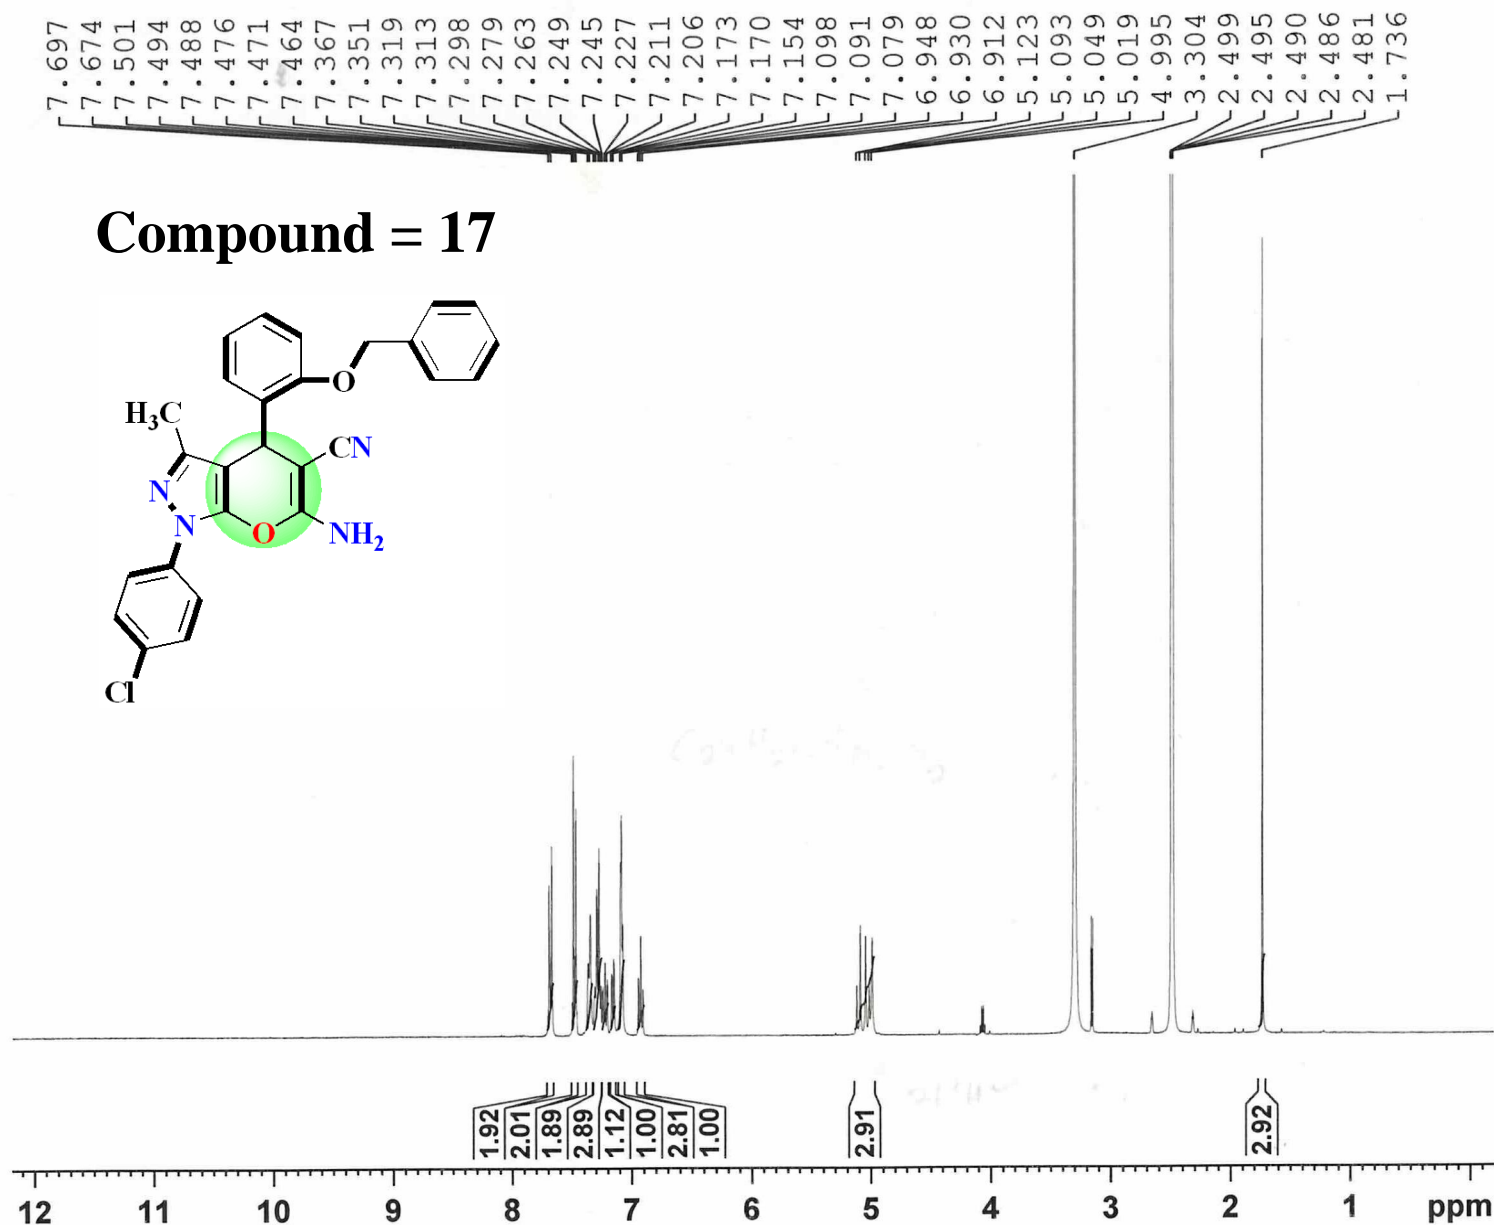

18

AVANCE NEO 400 MHz  
Lab # 115

Current Data Parameters  
NAME apr05-19  
EXPNO 3  
PROCNO 1

F2 - Acquisition Parameters  
Date\_ 20190405  
Time\_ 12.14 h  
INSTRUM AVNeo\_400  
PROBHD Z3756\_0202 (PH  
PULPROG zg30  
TD 32768  
SOLVENT DMSO  
NS 64  
DS 0  
SWH 7812.500 Hz  
FIDRES 0.476837 Hz  
AQ 2.0971520 sec  
RG 101  
DW 64.000 usec  
DE 6.50 usec  
TE 300.0 K  
D1 1.50000000 sec  
TD0 1  
SFO1 399.9331994 MHz  
NUC1 1H  
P0 5.00 usec  
P1 15.00 usec  
PLW1 8.02390003 W

F2 - Processing parameters  
SI 32768  
SF 399.9300071 MHz  
WDW EM  
SSB 0  
LB 0.30 Hz  
GB 0  
PC 1.00

# Compound = 18

DR.BABATUNDE/DR.KHALID/BO.I.189A/DMSO

300 K

1H

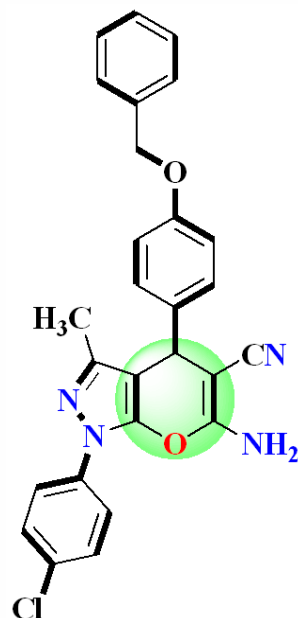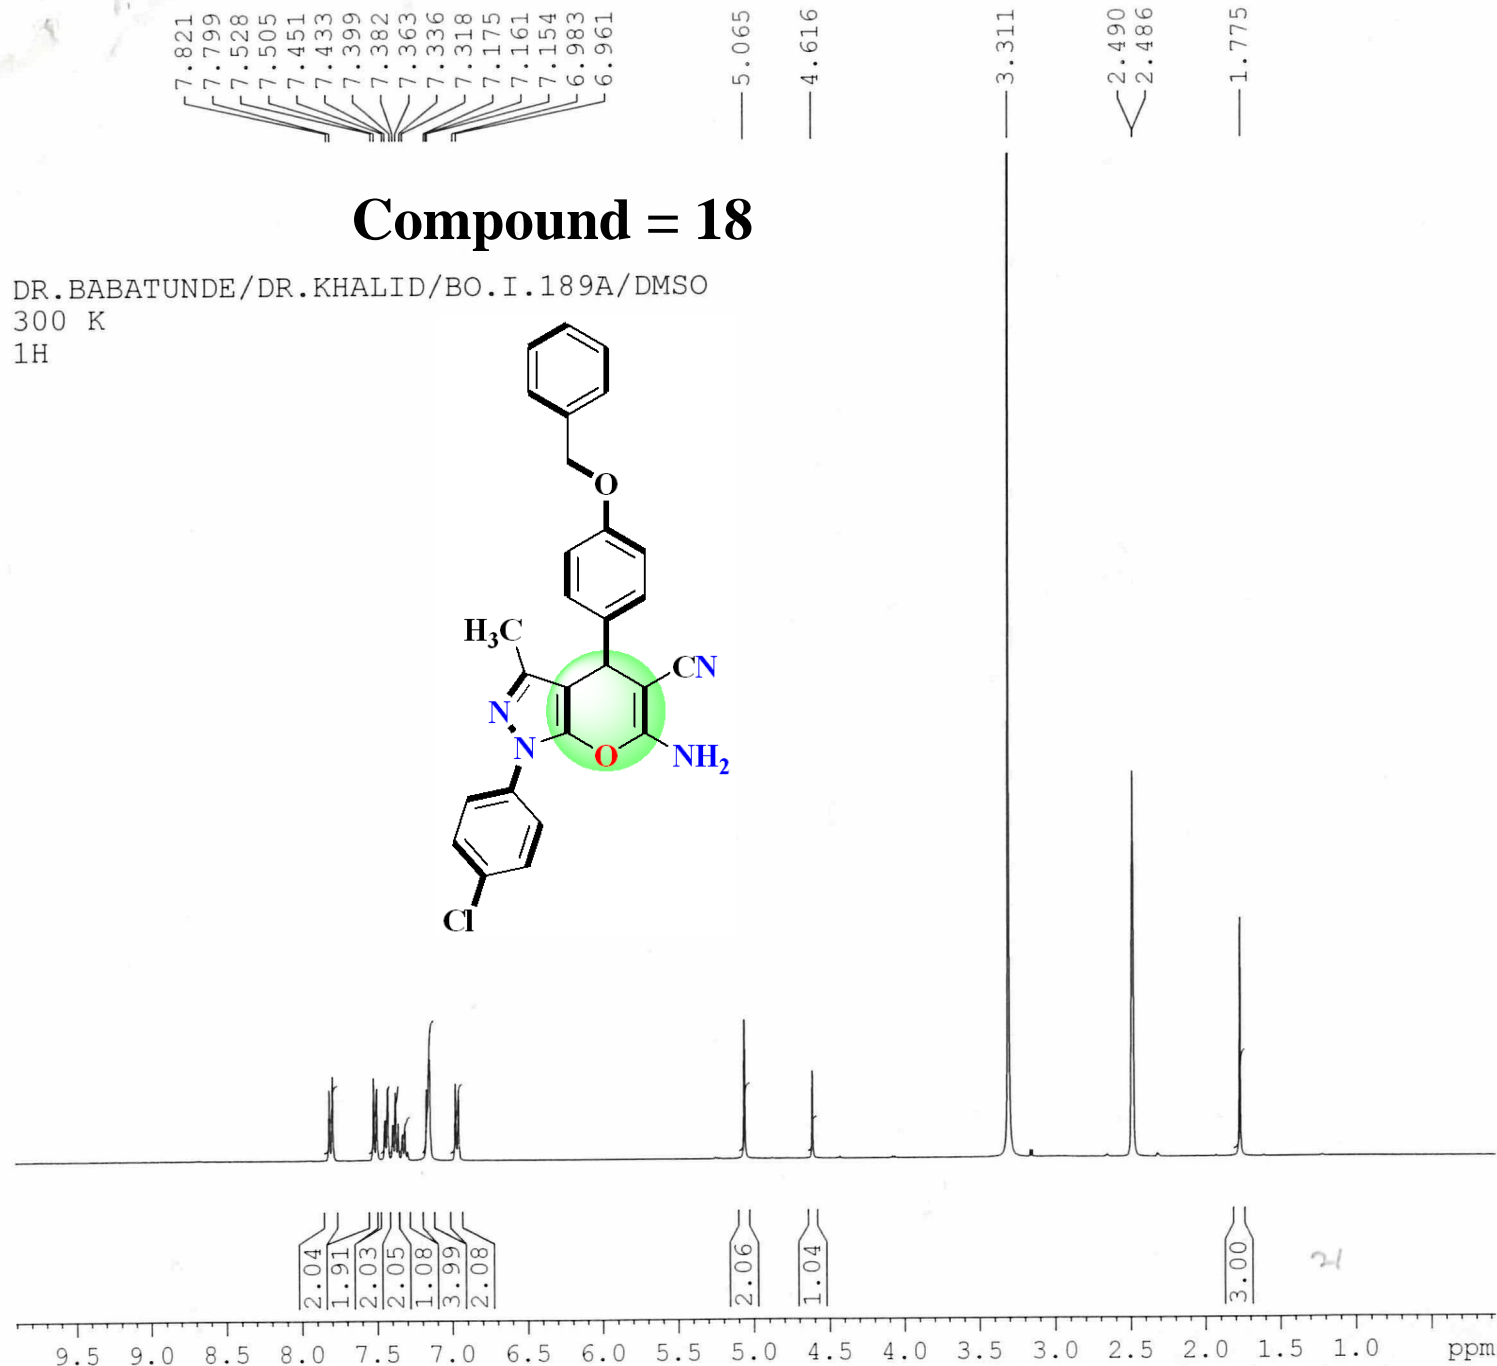

19

AVANCE NEO 400 MHz  
Lab # 115

DR.BABATUNDE/DR.KHALID/BO.I.191a/DMSO

300 K

<sup>1</sup>H

Compound = 19

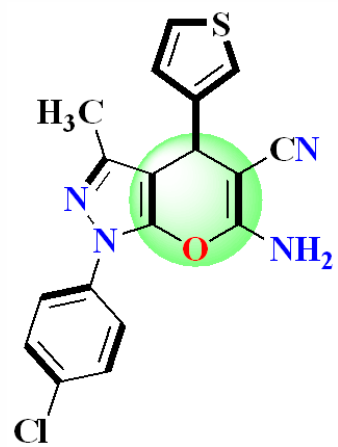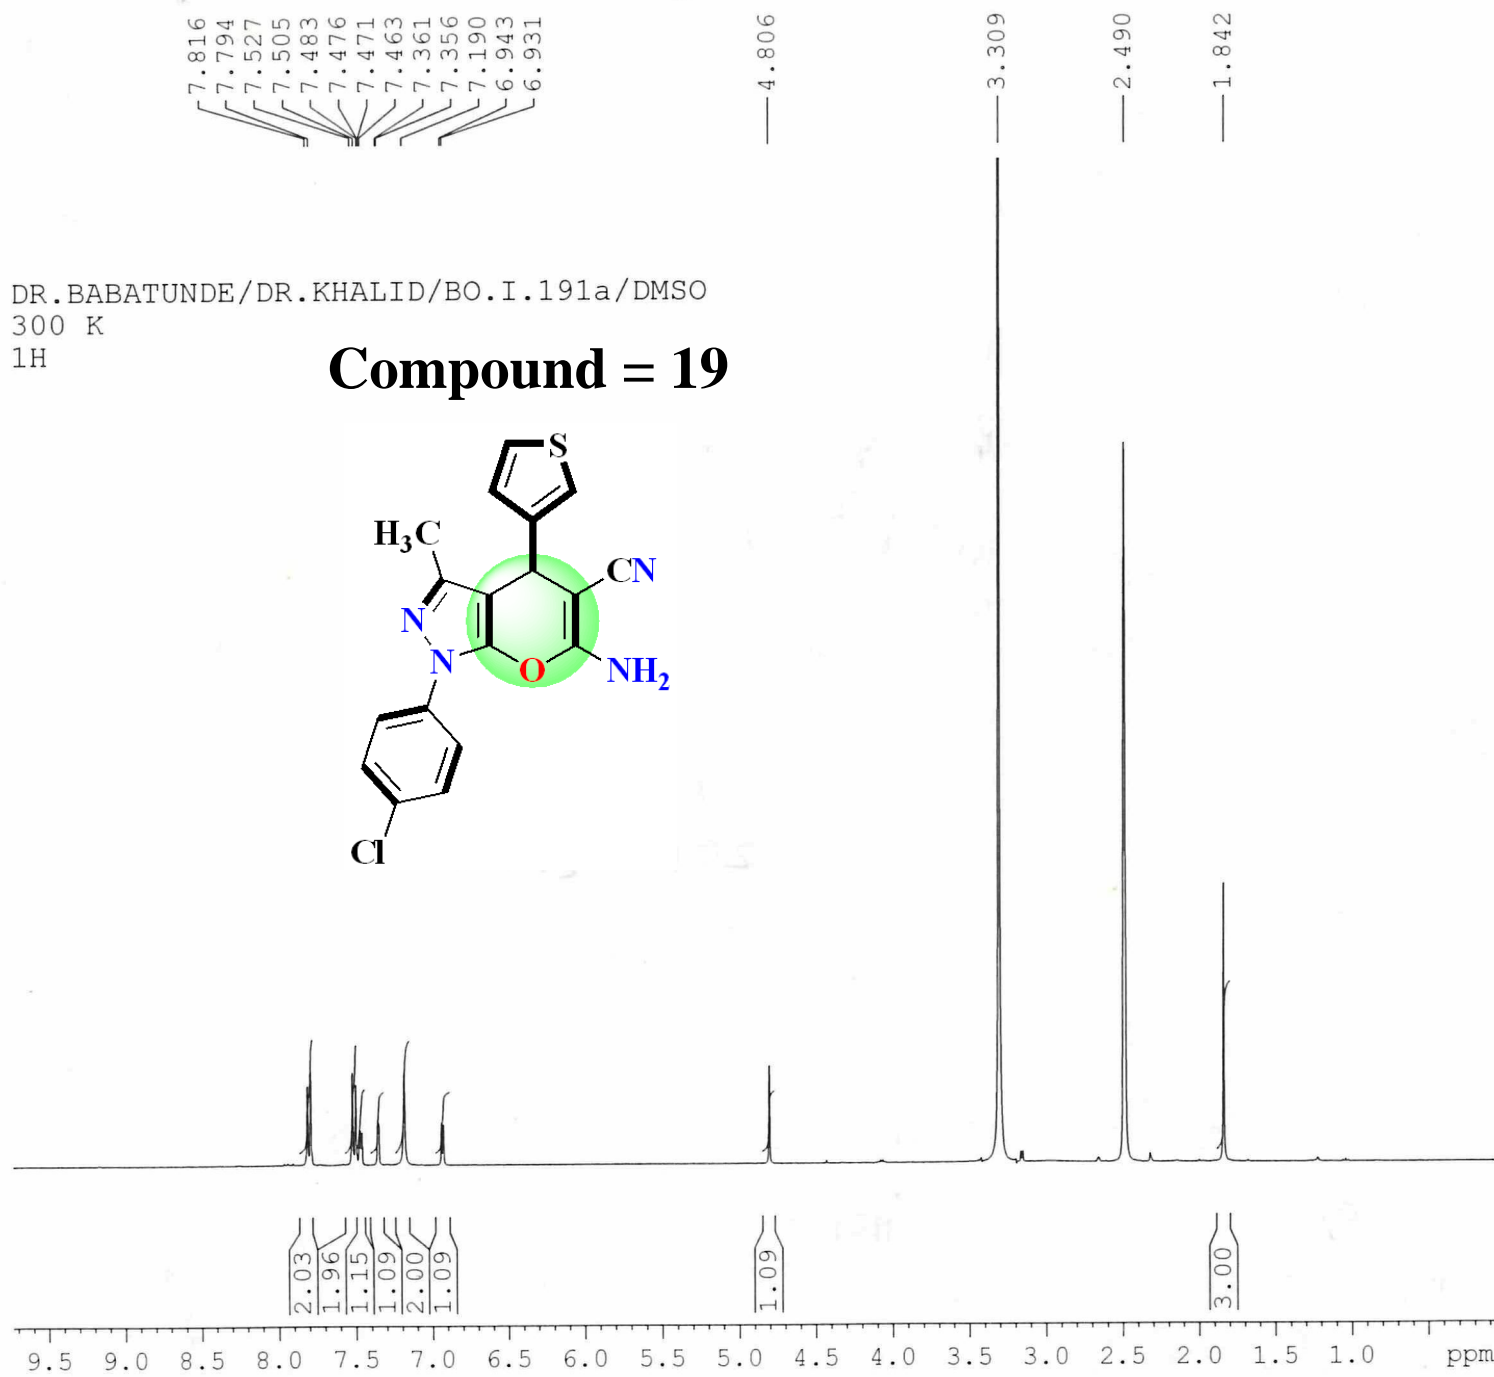

Current Data Parameters  
NAME apr05-19  
EXPNO 4  
PROCNO 1

F2 - Acquisition Parameters  
Date\_ 20190405  
Time 12.31 h  
INSTRUM AVNeo\_400  
PROBHD zg30  
PULPROG zg30  
TD 32768  
SOLVENT DMSO  
NS 64  
DS 0  
SWH 7812.500 Hz  
FIDRES 0.476837 Hz  
AQ 2.0971520 sec  
RG 101  
DW 64.000 usec  
DE 6.50 usec  
TE 300.0 K  
D1 1.50000000 sec  
TD0 1  
SFO1 399.9331994 MHz  
NUC1 1H  
P0 5.00 usec  
P1 15.00 usec  
PLW1 8.02390003 W

F2 - Processing parameters  
SI 32768  
SF 399.9300071 MHz  
WDW EM  
SSB 0  
LB 0.30 Hz  
GB 0  
PC 1.00



DR.O.BABATUNDE/DR.KHALID/BO-I-165a/DMSO  
1H

20  
**AVANCE NEO**  
**400 MHz**  
**LAB# 117**

**Compound = 20**

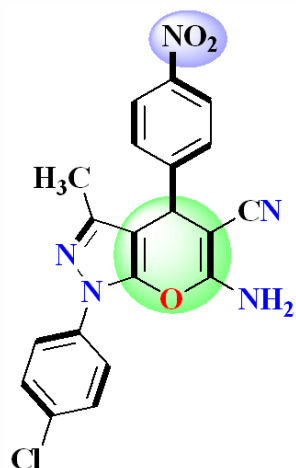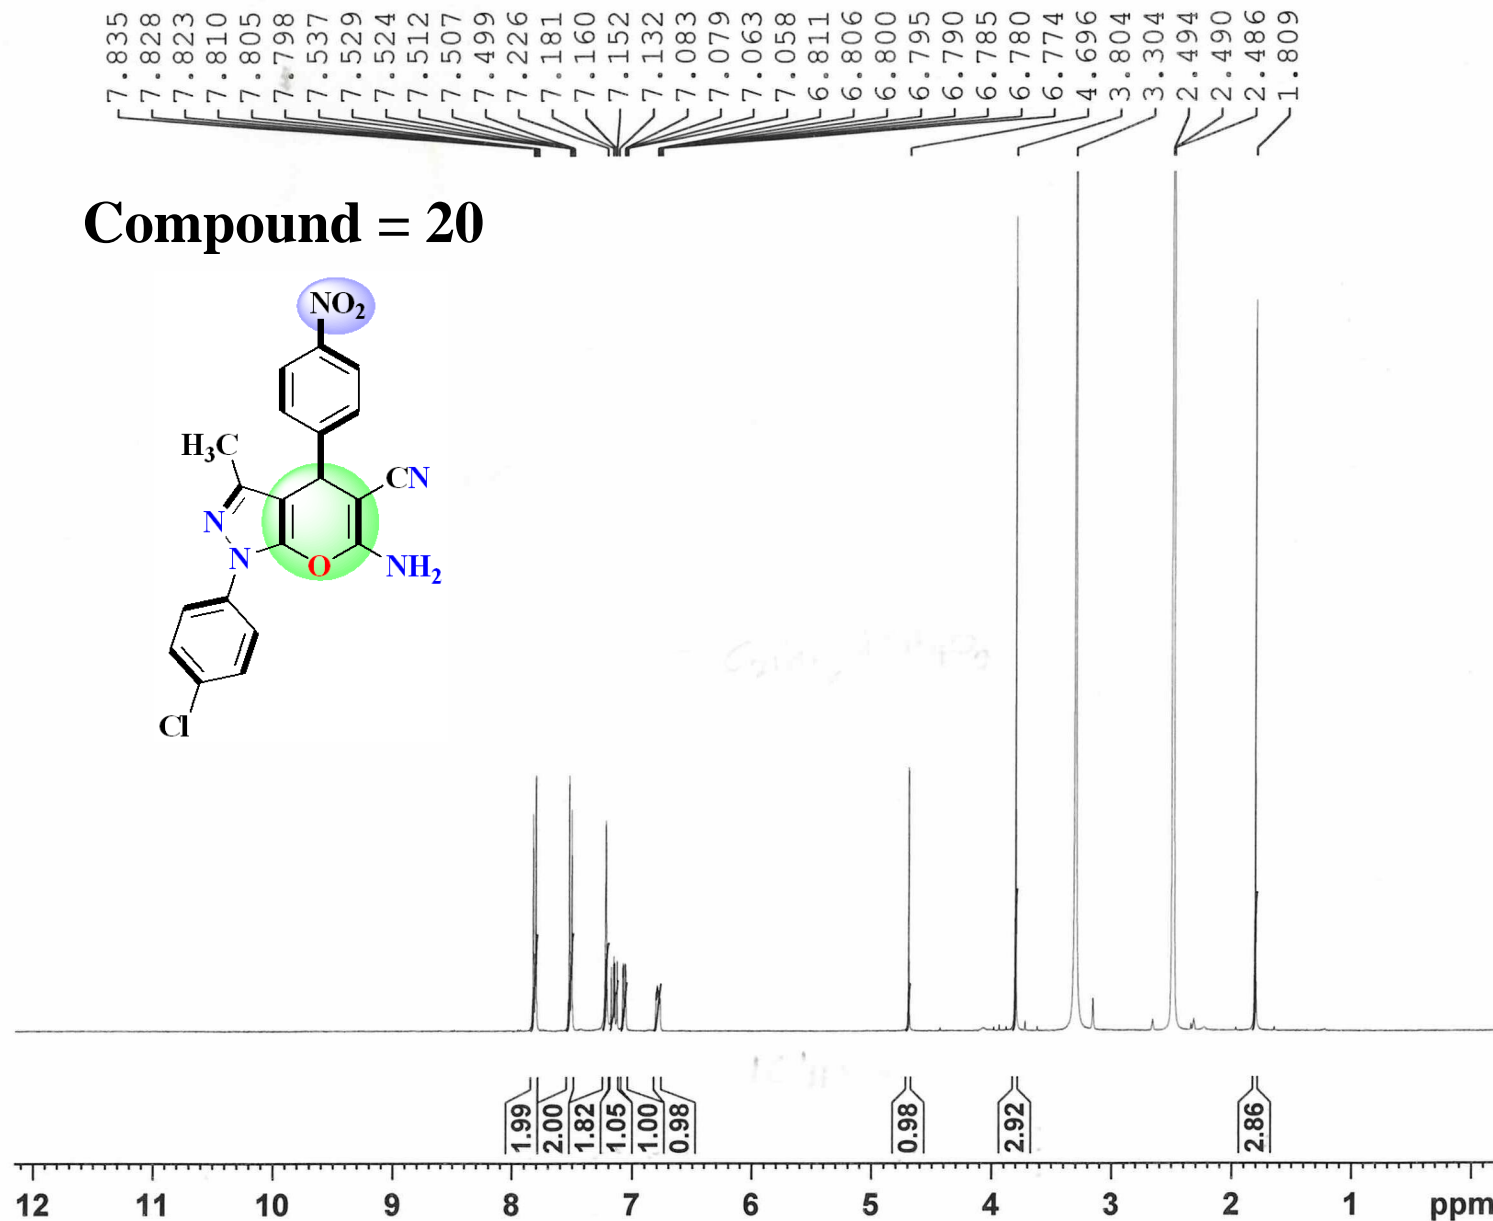

Current Data Parameters  
NAME mar15-19  
EXPNO 4  
PROCNO 1

F2 - Acquisition Parameters  
Date\_ 20190315  
Time 12.06 h  
INSTRUM Avance NEO 400MHz  
PROBHD Z114854\_0013 (   
PULPROG zg30  
TD 65536  
SOLVENT DMSO  
NS 32  
DS 0  
SWH 8196.722 Hz  
FIDRES 0.250144 Hz  
AQ 3.9976959 sec  
RG 101  
DW 61.000 usec  
DE 12.86 usec  
TE 300.0 K  
D1 1.50000000 sec  
TD0 1  
SFO1 400.1332010 MHz  
NUC1 1H  
P0 4.67 usec  
P1 14.00 usec  
PLW1 13.21300030 W

F2 - Processing parameters  
SI 32768  
SF 400.1300071 MHz  
WDW EM  
SSB 0  
LB 0.30 Hz  
GB 0  
PC 1.00
