# Supplementary material
Source: publisher figshare collection journal article supplement (https://future-science-group.figshare.com/articles/dataset/_/21378228)
Supplement: Supplementary file 2 [file 1]

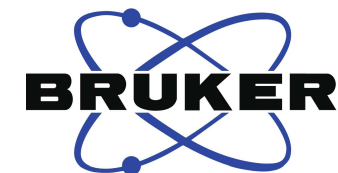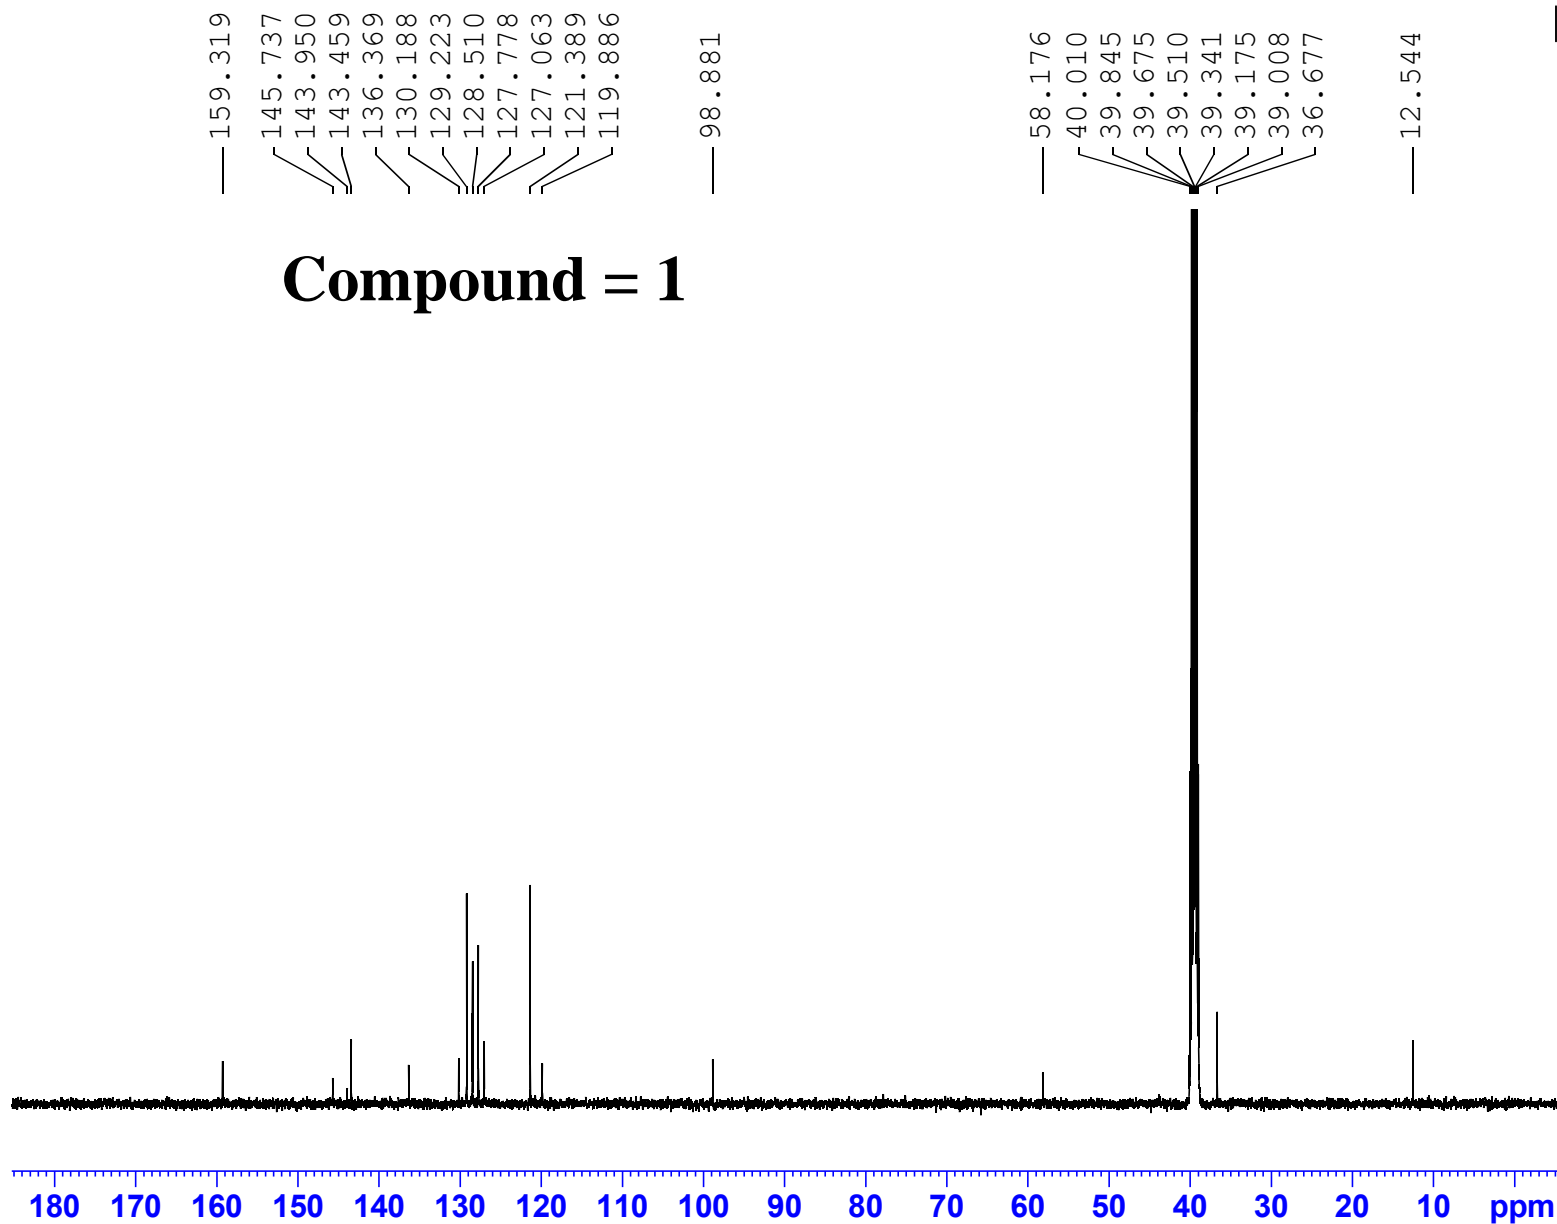

Current Data Parameters  
NAME jul21-22  
EXPNO 2  
PROCNO 1

F2 - Acquisition Parameters  
Date\_ 20220721  
Time\_ 23.30 h  
INSTRUM AVNeo 500  
PROBHD z8281\_0183 (TX  
PULPROG zgpg  
TD 32768  
SOLVENT DMSO  
NS 18432  
DS 4  
SWH 30120.482 Hz  
FIDRES 1.838408 Hz  
AQ 0.5439488 sec  
RG 101  
DW 16.600 usec  
DE 12.00 usec  
TE 298.0 K  
D1 2.00000000 sec  
D11 0.03000000 sec  
TD0 18  
SFO1 125.7973986 MHz  
NUC1 13C  
P1 12.00 usec  
PLW1 229.03999329 W  
SFO2 500.2320009 MHz  
NUC2 1H  
CPDPRG[2] waltz65  
PCPD2 80.00 usec  
PLW2 18.45899963 W  
PLW12 0.18459000 W  
PLW13 0.09284900 W

F2 - Processing parameters  
SI 16384  
SF 125.7829949 MHz  
WDW EM  
SSB 0  
LB 1.00 Hz  
GB 0  
PC 1.40

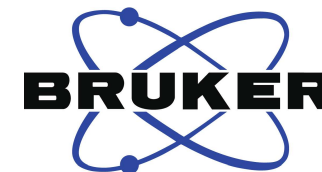

— 159.346  
145.628  
142.507  
136.299  
131.577  
130.232  
129.694  
129.195  
128.496  
121.425  
119.747  
— 98.402  
— 57.708  
40.328  
40.051  
39.772  
39.494  
39.216  
38.938  
38.659  
35.980  
— 12.529

**Compound = 2**

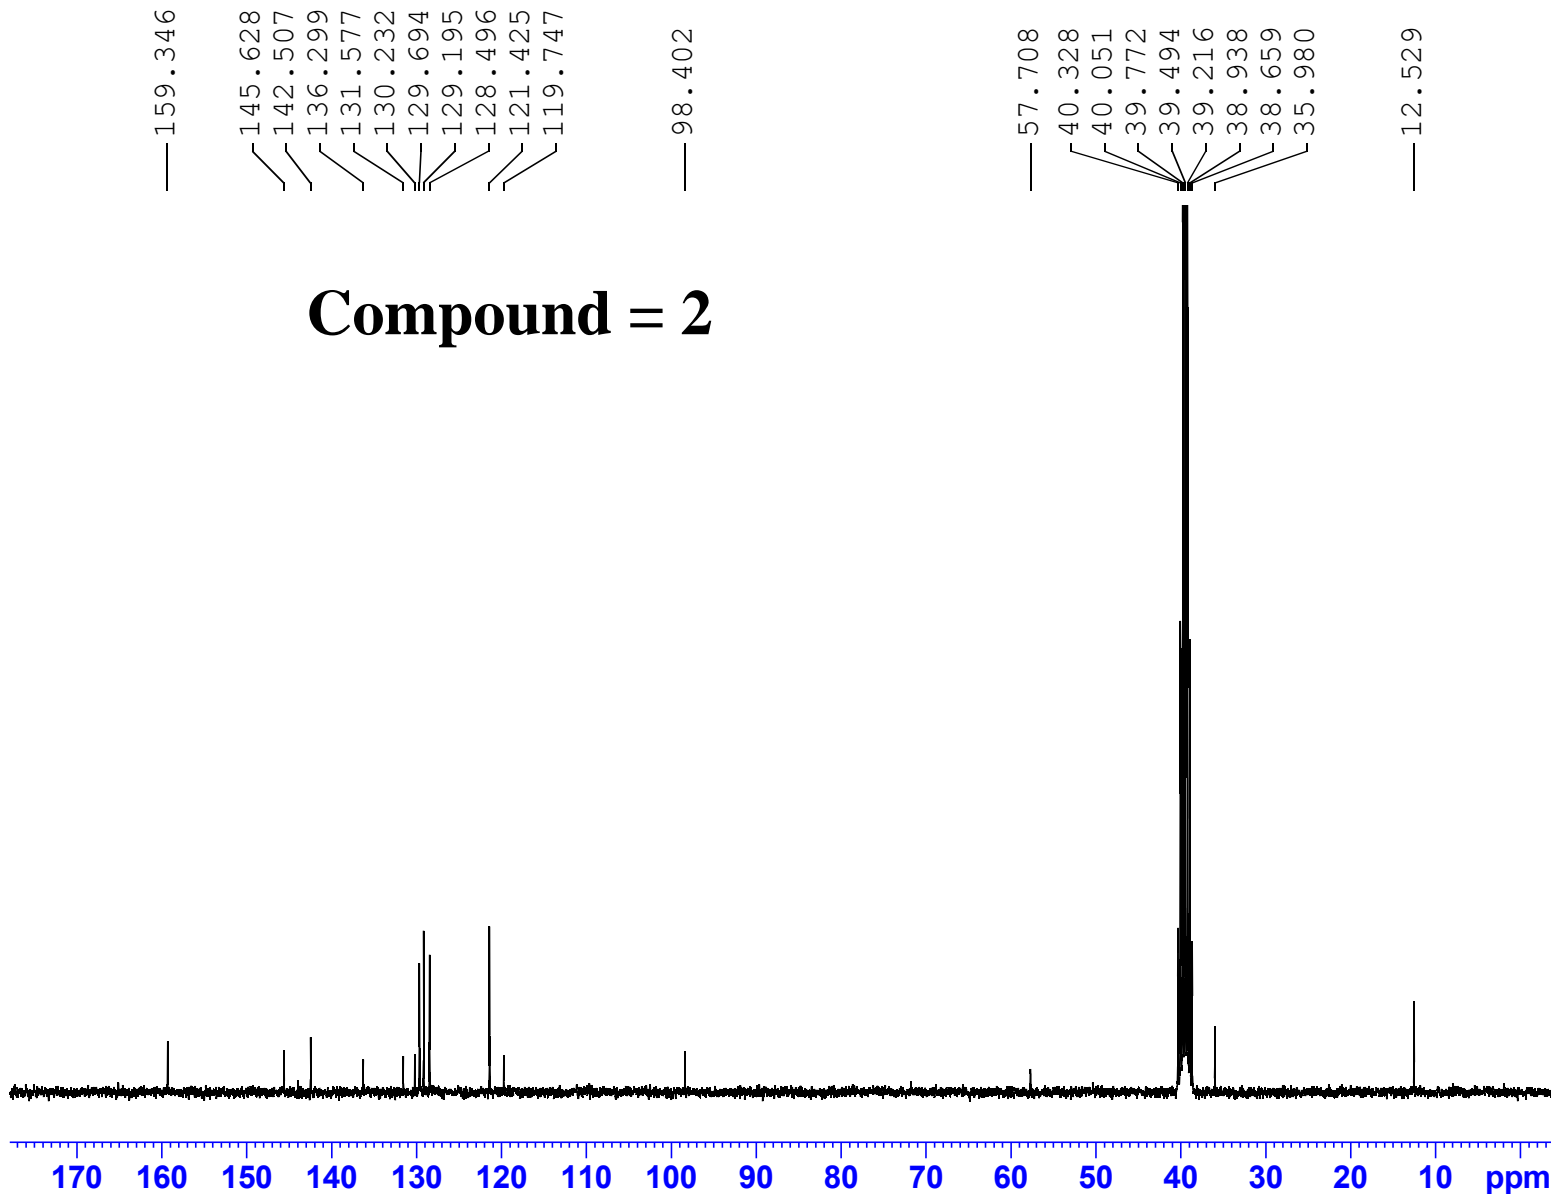

Current Data Parameters  
NAME July16-22  
EXPNO 2  
PROCNO 1

F2 - Acquisition Parameters  
Date\_ 20220717  
Time\_ 5.16 h  
INSTRUM Avance Neo 300  
PROBHD Z8284\_0948 (PH  
PULPROG zgpg  
TD 32768  
SOLVENT DMSO  
NS 18432  
DS 8  
SWH 17857.143 Hz  
FIDRES 1.089913 Hz  
AQ 0.9175040 sec  
RG 12.5649  
DW 28.000 usec  
DE 12.00 usec  
TE 300.0 K  
D1 2.00000000 sec  
D11 0.03000000 sec  
TD0 18  
SFO1 75.4764278 MHz  
NUC1 13C  
P1 10.00 usec  
PLW1 53.07400131 W  
SFO2 300.1312005 MHz  
NUC2 1H  
CPDPRG[2] waltz65  
PCPD2 90.00 usec  
PLW2 8.72920036 W  
PLW12 0.24247999 W  
PLW13 0.12196000 W

F2 - Processing parameters  
SI 16384  
SF 75.4677869 MHz  
WDW EM  
SSB 0  
LB 1.00 Hz  
GB 0  
PC 1.00

SHEHRYAR HAMEED/ Dr.Khalid / BO-II-13 / DMSO  
BB

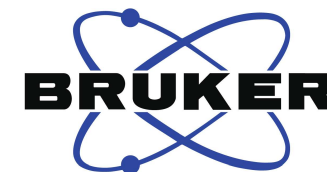

Current Data Parameters  
NAME BO-II-13  
EXPNO 2  
PROCNO 1

F2 - Acquisition Parameters  
Date\_ 20220629  
Time 2.37 h  
INSTRUM Avance Neo 500  
PROBHD Z8107\_0198 (PH  
PULPROG zgpg  
TD 32768  
SOLVENT DMSO  
NS 16384  
DS 8  
SWH 30120.482 Hz  
FIDRES 1.838408 Hz  
AQ 0.5439488 sec  
RG 101  
DW 16.600 usec  
DE 6.50 usec  
TE 298.0 K  
D1 2.00000000 sec  
D11 0.03000000 sec  
TD0 16  
SFO1 125.8206594 MHz  
NUC1 13C  
P1 16.00 usec  
PLW1 145.00000000 W  
SFO2 500.3320013 MHz  
NUC2 1H  
CPDPRG[2] waltz65  
PCPD2 80.00 usec  
PLW2 10.00000000 W  
PLW12 0.14854001 W  
PLW13 0.07471200 W

F2 - Processing parameters  
SI 16384  
SF 125.8081414 MHz  
WDW EM  
SSB 0  
LB 1.00 Hz  
GB 0  
PC 1.40

**Compound = 3**

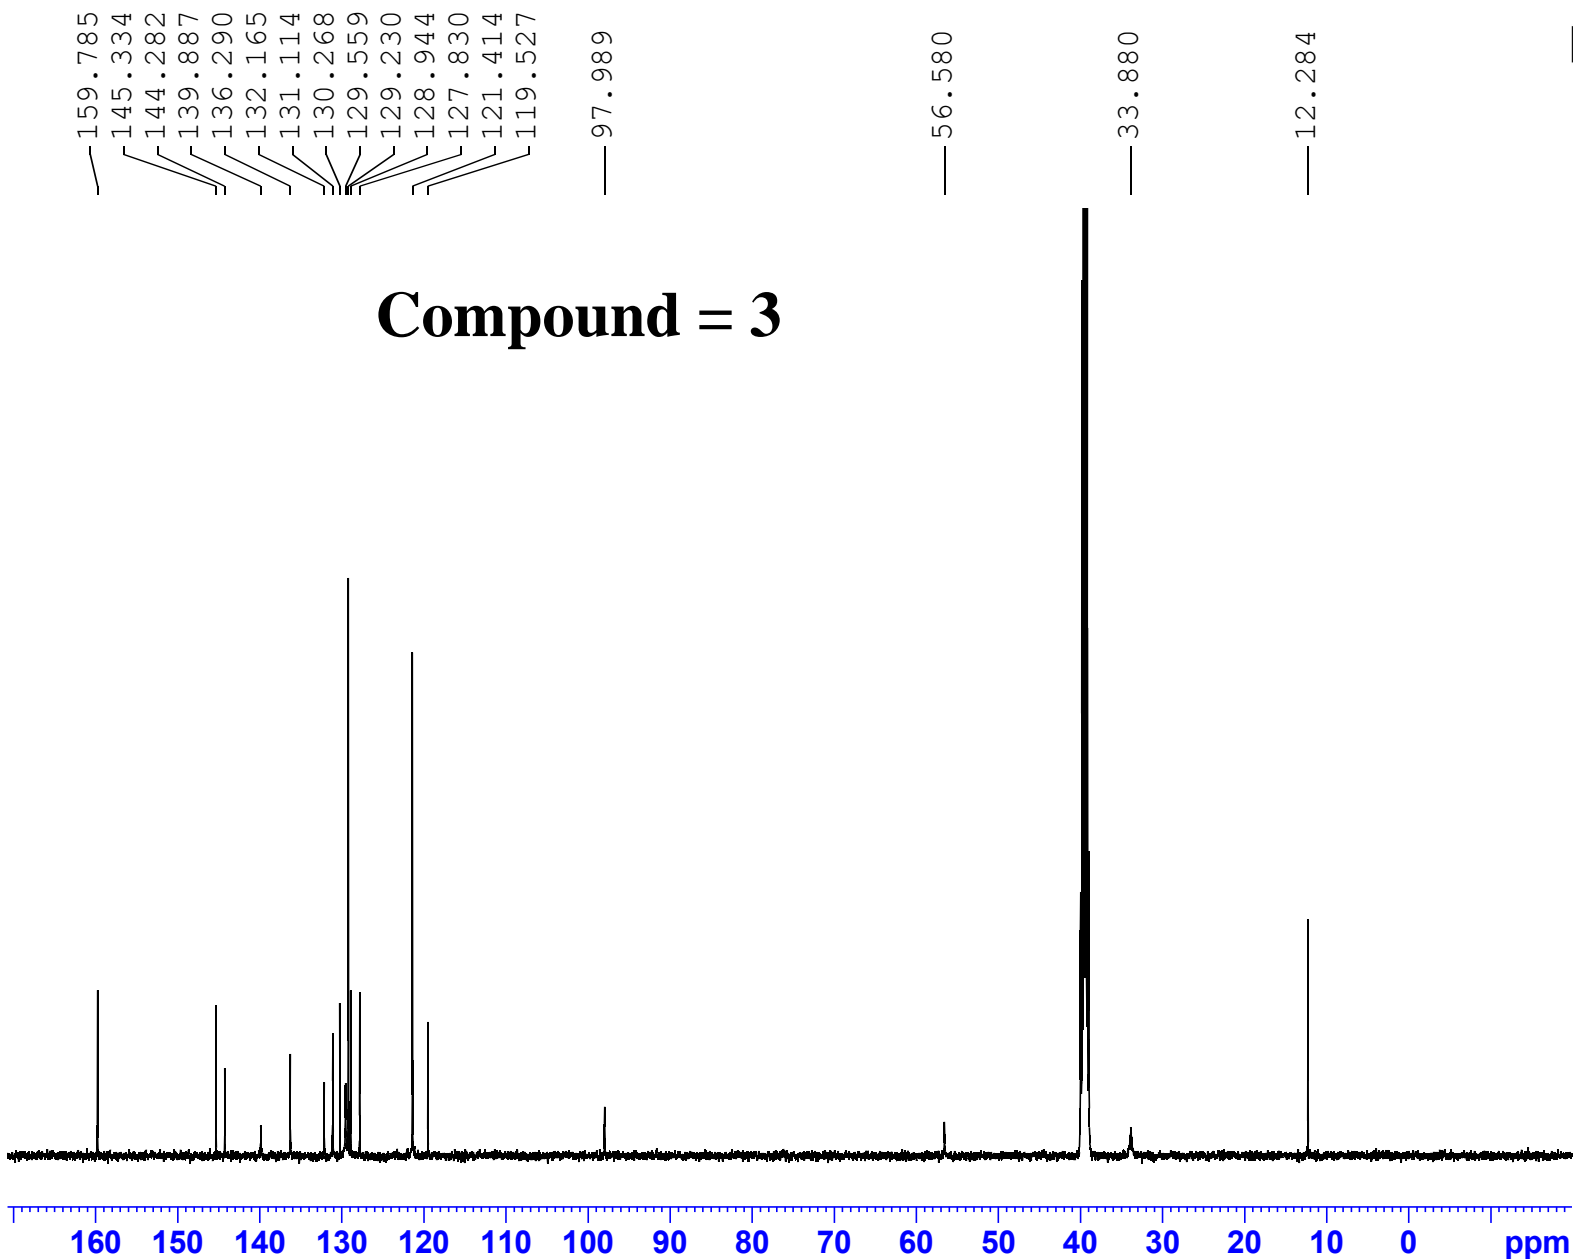

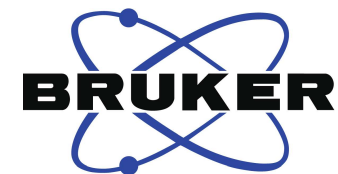

Current Data Parameters  
NAME July19-22  
EXPNO 1  
PROCNO 1

# F2 - Acquisition Parameters

Date 20220720  
Time 8.43 h  
INSTRUM Avance Neo 300  
PROBHD Z8284\_0948 (PH  
PULPROG zgpg  
TD 32768  
SOLVENT DMSO  
NS 20626  
DS 8  
SWH 17857.143 Hz  
FIDRES 1.089913 Hz  
AQ 0.9175040 sec  
RG 12.5649  
DW 28.000 usec  
DE 12.00 usec  
TE 300.0 K  
D1 2.00000000 sec  
D11 0.03000000 sec  
TD0 25  
SFO1 75.4764278 MHz  
NUC1 13C  
P1 10.00 usec  
PLW1 53.07400131 W  
SFO2 300.1312005 MHz  
NUC2 1H  
CPDPRG[2] waltz65  
PCPD2 90.00 usec  
PLW2 8.72920036 W  
PLW12 0.24247999 W  
PLW13 0.12196000 W

# F2 - Processing parameters

SI 16384  
SF 75.4677869 MHz  
WDW EM  
SSB 0  
LB 1.00 Hz  
GB 0  
PC 1.00

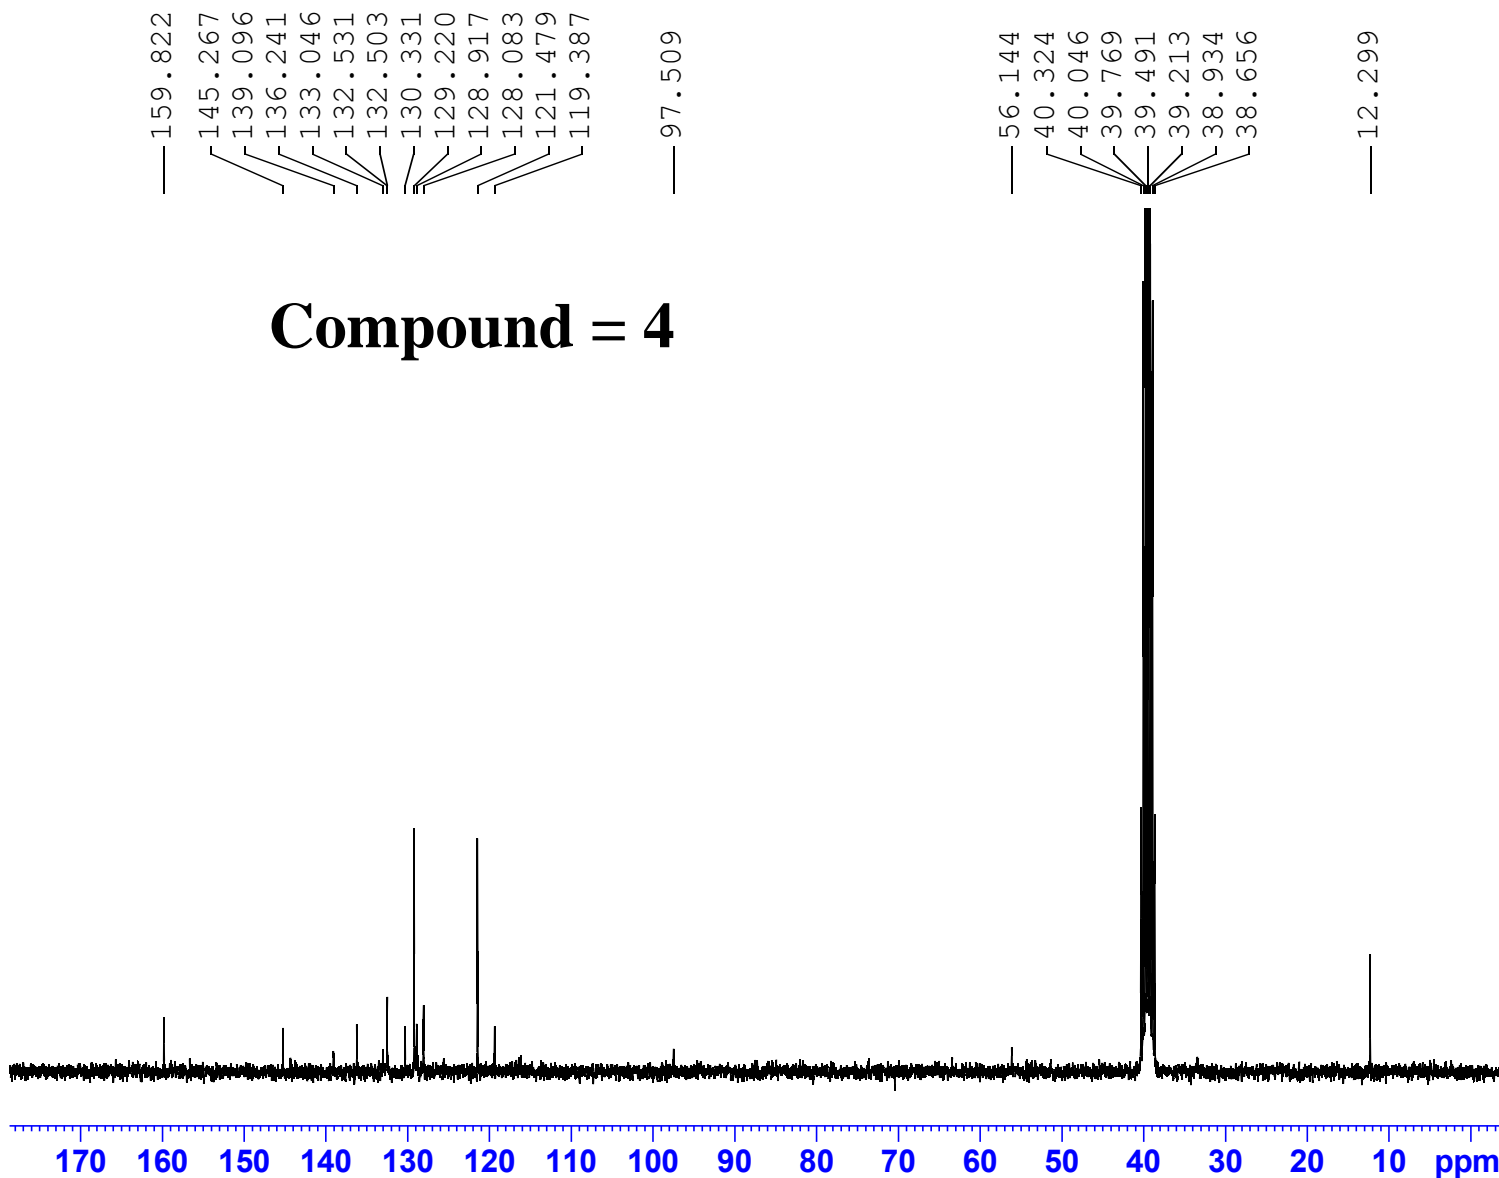

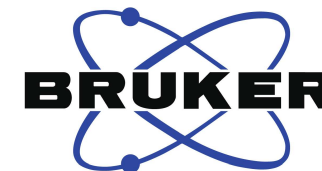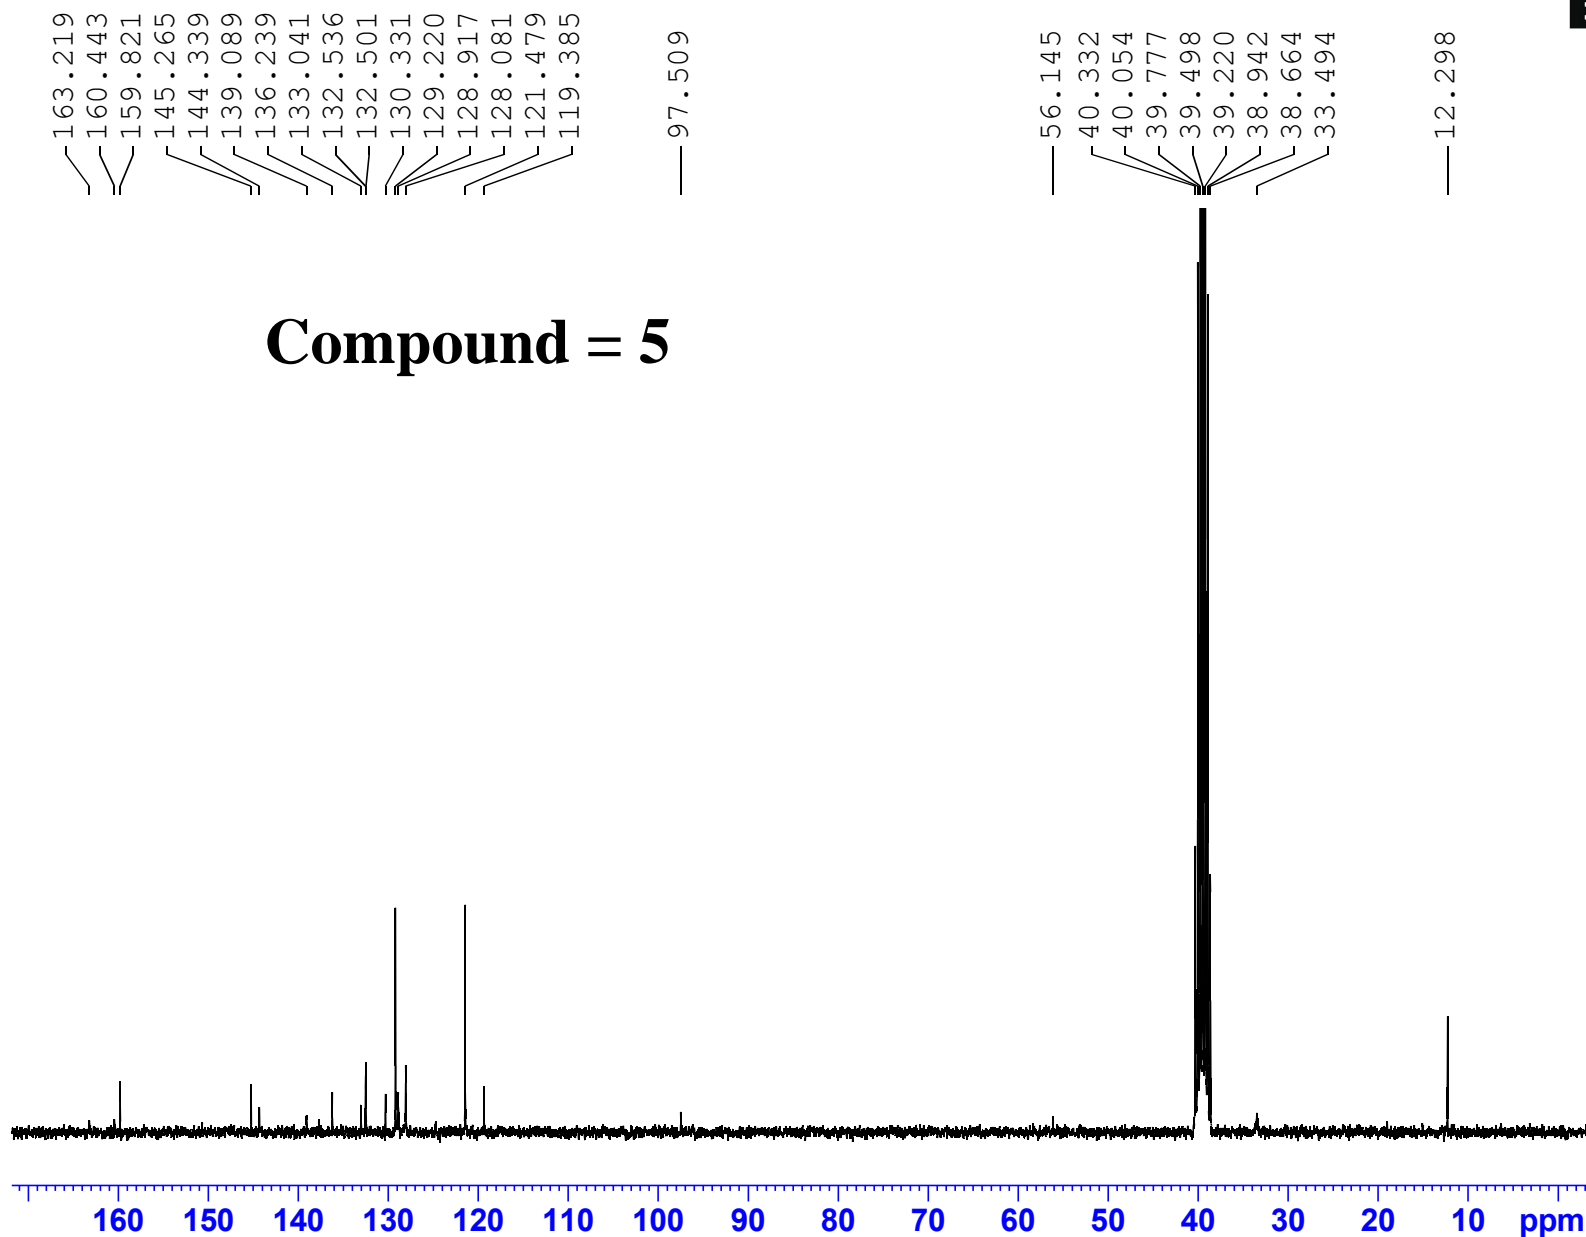

Current Data Parameters  
NAME July03-22  
EXPNO 1  
PROCNO 1

F2 - Acquisition Parameters  
Date 20220704  
Time 5.20 h  
INSTRUM Avance Neo 300  
PROBHD Z8284\_0948 (PH  
PULPROG zgpg  
TD 32768  
SOLVENT DMSO  
NS 20480  
DS 8  
SWH 17857.143 Hz  
FIDRES 1.089913 Hz  
AQ 0.9175040 sec  
RG 5.09511  
DW 28.000 usec  
DE 12.00 usec  
TE 300.0 K  
D1 2.00000000 sec  
D11 0.03000000 sec  
TD0 20  
SFO1 75.4764278 MHz  
NUC1 13C  
P1 10.00 usec  
PLW1 53.07400131 W  
SFO2 300.1312005 MHz  
NUC2 1H  
CPDPRG[2] waltz65  
PCPD2 90.00 usec  
PLW2 8.72920036 W  
PLW12 0.24247999 W  
PLW13 0.12196000 W

F2 - Processing parameters  
SI 16384  
SF 75.4677870 MHz  
WDW EM  
SSB 0  
LB 1.00 Hz  
GB 0  
PC 1.00

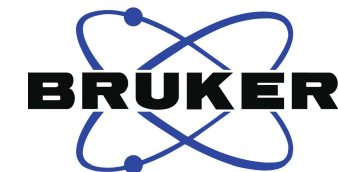

—159.726  
—154.421  
—145.356  
—144.256  
—141.292  
—136.297  
—130.245  
—129.213  
—127.879  
—122.181  
—121.390  
—120.556  
—119.487  
—111.022  
—98.069

—56.131  
—40.327  
—40.049  
—39.771  
—39.493  
—39.215  
—38.936  
—38.658

—12.300

**Compound = 6**

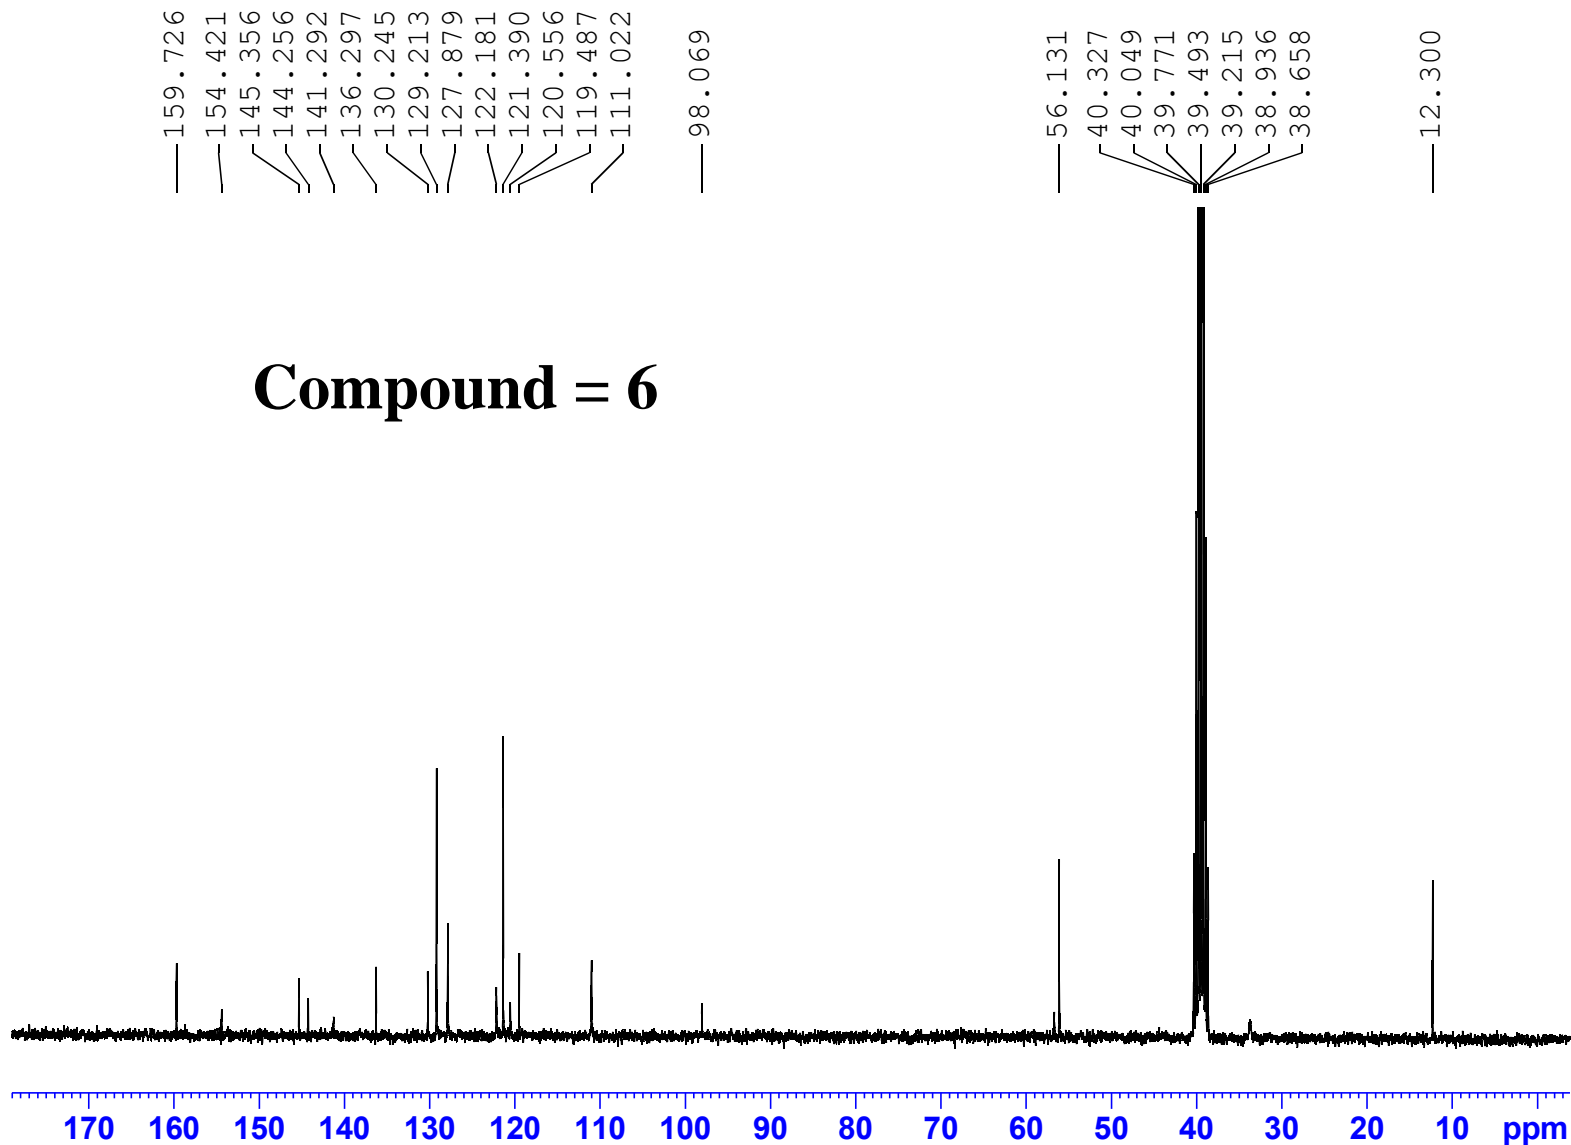

Current Data Parameters  
NAME July17-22  
EXPNO 1  
PROCNO 1

F2 - Acquisition Parameters  
Date\_ 20220718  
Time\_ 3.58 h  
INSTRUM Avance Neo 300  
PROBHD Z8284\_0948 (PH  
PULPROG zgpg  
TD 32768  
SOLVENT DMSO  
NS 18432  
DS 8  
SWH 17857.143 Hz  
FIDRES 1.089913 Hz  
AQ 0.9175040 sec  
RG 12.5649  
DW 28.000 usec  
DE 12.00 usec  
TE 300.3 K  
D1 2.00000000 sec  
D11 0.03000000 sec  
TD0 18  
SFO1 75.4764278 MHz  
NUC1 13C  
P1 10.00 usec  
PLW1 53.07400131 W  
SFO2 300.1312005 MHz  
NUC2 1H  
CPDPRG[2] waltz65  
PCPD2 90.00 usec  
PLW2 8.72920036 W  
PLW12 0.24247999 W  
PLW13 0.12196000 W

F2 - Processing parameters  
SI 16384  
SF 75.4677869 MHz  
WDW EM  
SSB 0  
LB 1.00 Hz  
GB 0  
PC 1.00

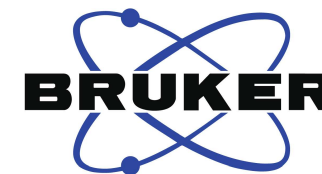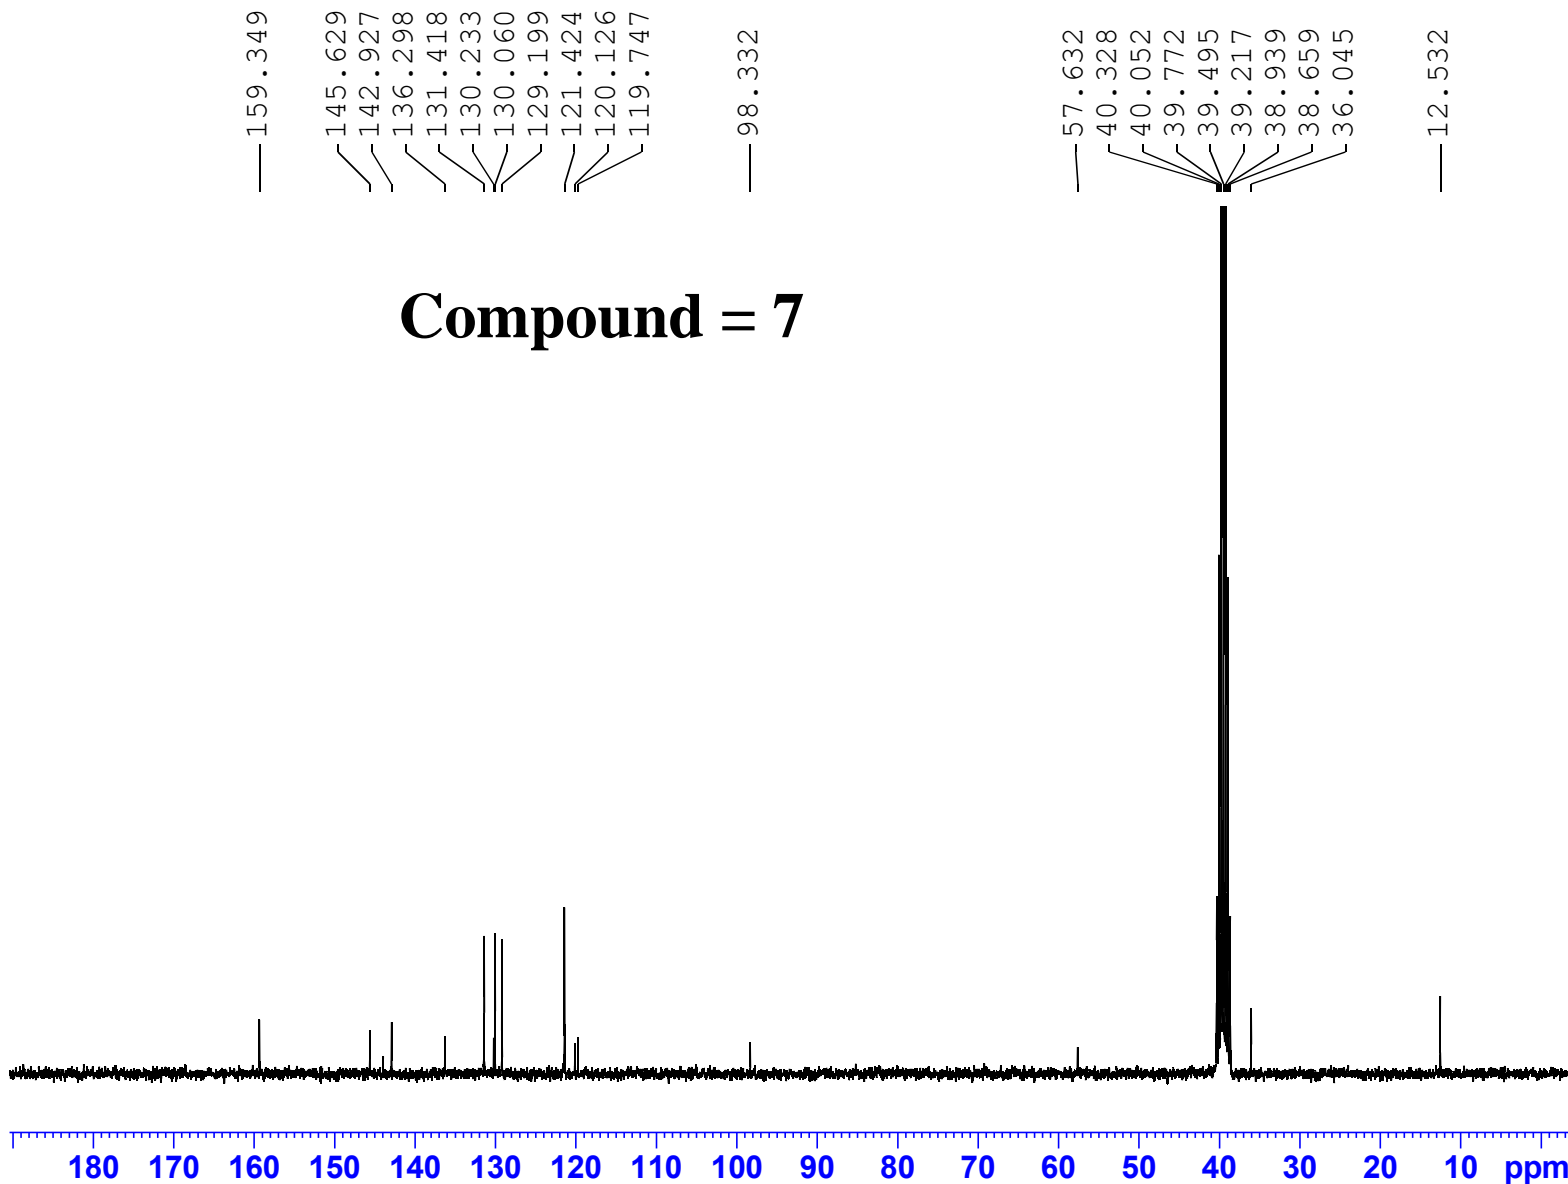

Current Data Parameters  
NAME July14-22  
EXPNO 2  
PROCNO 1

F2 - Acquisition Parameters  
Date\_ 20220715  
Time 3.23 h  
INSTRUM Avance Neo 300  
PROBHD Z8284\_0948 (PH  
PULPROG zgpg  
TD 32768  
SOLVENT DMSO  
NS 20480  
DS 8  
SWH 17857.143 Hz  
FIDRES 1.089913 Hz  
AQ 0.9175040 sec  
RG 12.5649  
DW 28.000 usec  
DE 12.00 usec  
TE 300.0 K  
D1 2.00000000 sec  
D11 0.03000000 sec  
TD0 20  
SFO1 75.4764278 MHz  
NUC1 13C  
P1 10.00 usec  
PLW1 53.07400131 W  
SFO2 300.1312005 MHz  
NUC2 1H  
CPDPRG[2] waltz65  
PCPD2 90.00 usec  
PLW2 8.72920036 W  
PLW12 0.24247999 W  
PLW13 0.12196000 W

F2 - Processing parameters  
SI 16384  
SF 75.4677869 MHz  
WDW EM  
SSB 0  
LB 1.00 Hz  
GB 0  
PC 1.00

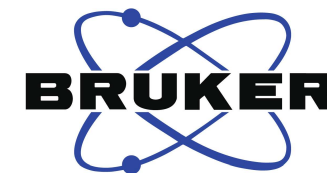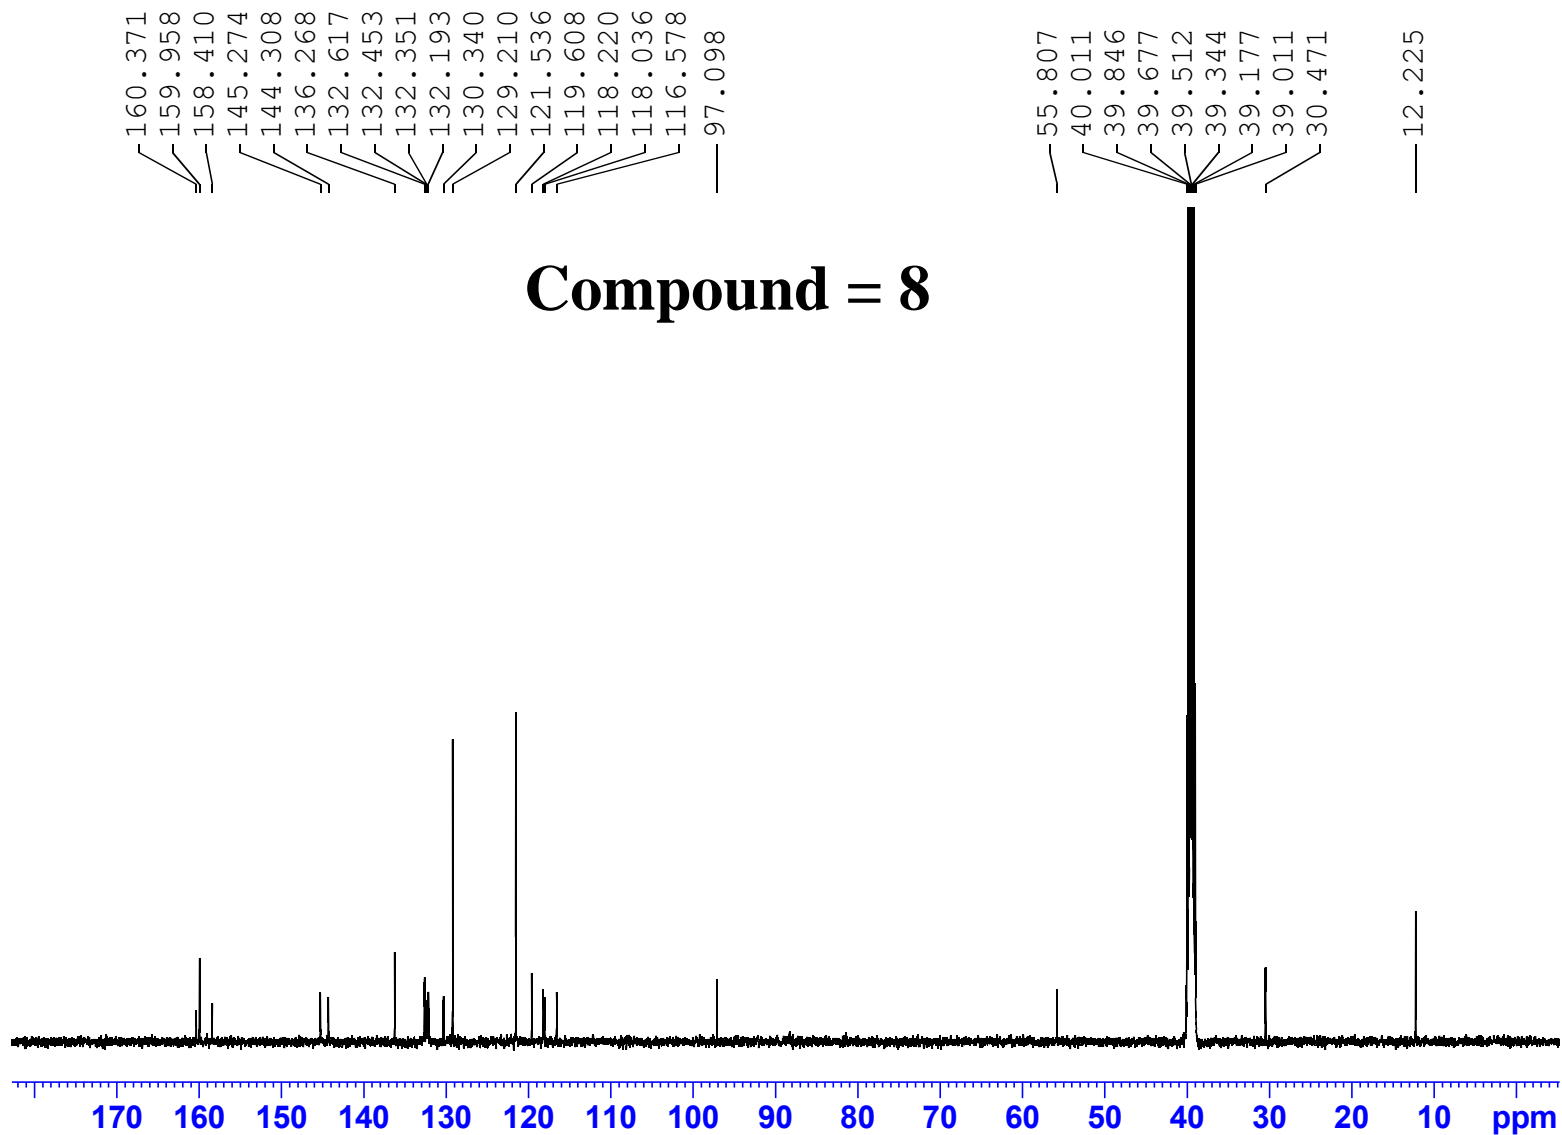

Current Data Parameters  
NAME jul16-22  
EXPNO 3  
PROCNO 1

F2 - Acquisition Parameters  
Date\_ 20220717  
Time\_ 2.20 h  
INSTRUM AVNeo 500  
PROBHD z8281\_0183 (TX)  
PULPROG zgpg  
TD 32768  
SOLVENT DMSO  
NS 18432  
DS 4  
SWH 30120.482 Hz  
FIDRES 1.838408 Hz  
AQ 0.5439488 sec  
RG 101  
DW 16.600 usec  
DE 12.00 usec  
TE 298.0 K  
D1 2.00000000 sec  
D11 0.03000000 sec  
TD0 18  
SFO1 125.7973986 MHz  
NUC1 13C  
P1 12.00 usec  
PLW1 229.03999329 W  
SFO2 500.2320009 MHz  
NUC2 1H  
CPDPRG[2] waltz65  
PCPD2 80.00 usec  
PLW2 18.45899963 W  
PLW12 0.18459000 W  
PLW13 0.09284900 W

F2 - Processing parameters  
SI 16384  
SF 125.7829949 MHz  
WDW EM  
SSB 0  
LB 1.00 Hz  
GB 0  
PC 1.40



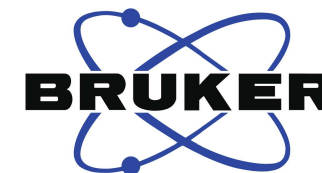

Current Data Parameters  
NAME July09-22  
EXPNO 1  
PROCNO 1

F2 - Acquisition Parameters  
Date 20220710  
Time 6.54 h  
INSTRUM Avance Neo 300  
PROBHD Z8284\_0948 (PH  
PULPROG zgpg  
TD 32768  
SOLVENT DMSO  
NS 20480  
DS 8  
SWH 17857.143 Hz  
FIDRES 1.089913 Hz  
AQ 0.9175040 sec  
RG 5.09511  
DW 28.000 usec  
DE 12.00 usec  
TE 300.0 K  
D1 2.00000000 sec  
D11 0.03000000 sec  
TD0 20  
SFO1 75.4764278 MHz  
NUC1 13C  
P1 10.00 usec  
PLW1 53.07400131 W  
SFO2 300.1312005 MHz  
NUC2 1H  
CPDPRG[2] waltz65  
PCPD2 90.00 usec  
PLW2 8.72920036 W  
PLW12 0.24247999 W  
PLW13 0.12196000 W

F2 - Processing parameters  
SI 16384  
SF 75.4677870 MHz  
WDW EM  
SSB 0  
LB 1.00 Hz  
GB 0  
PC 1.00

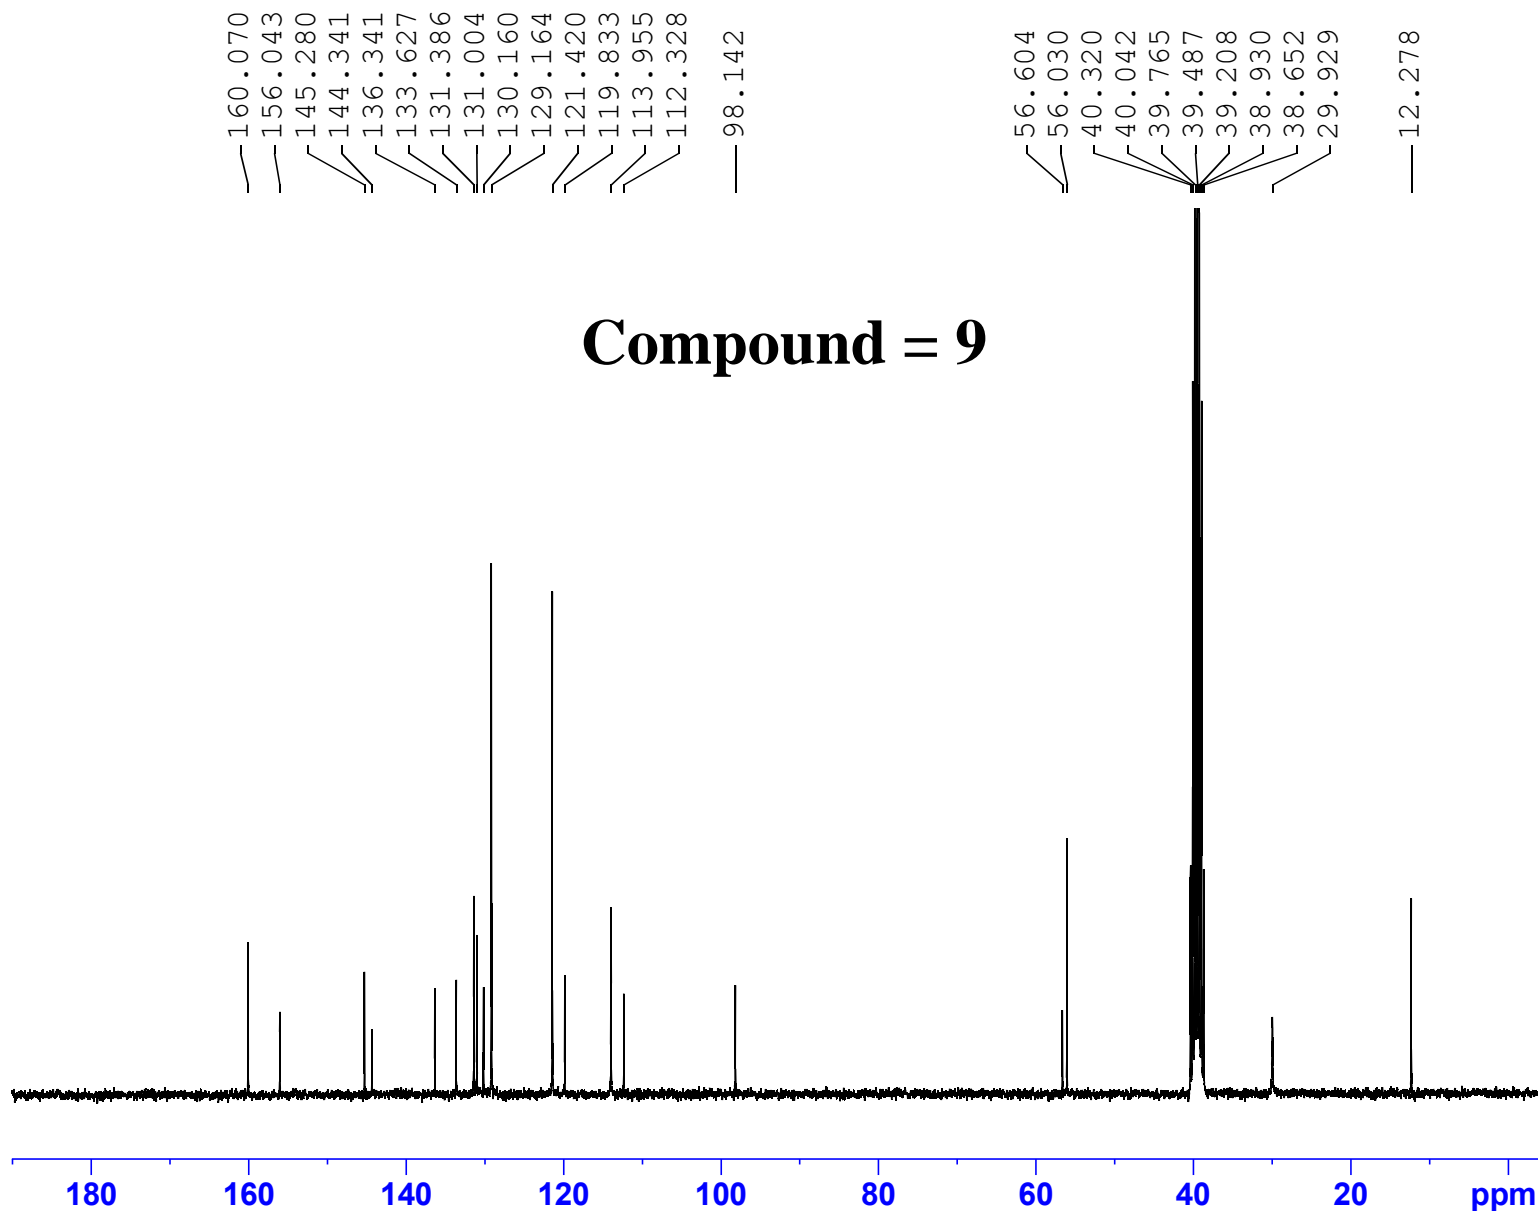

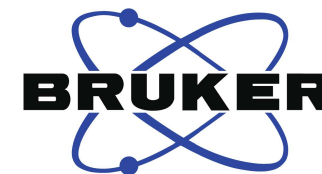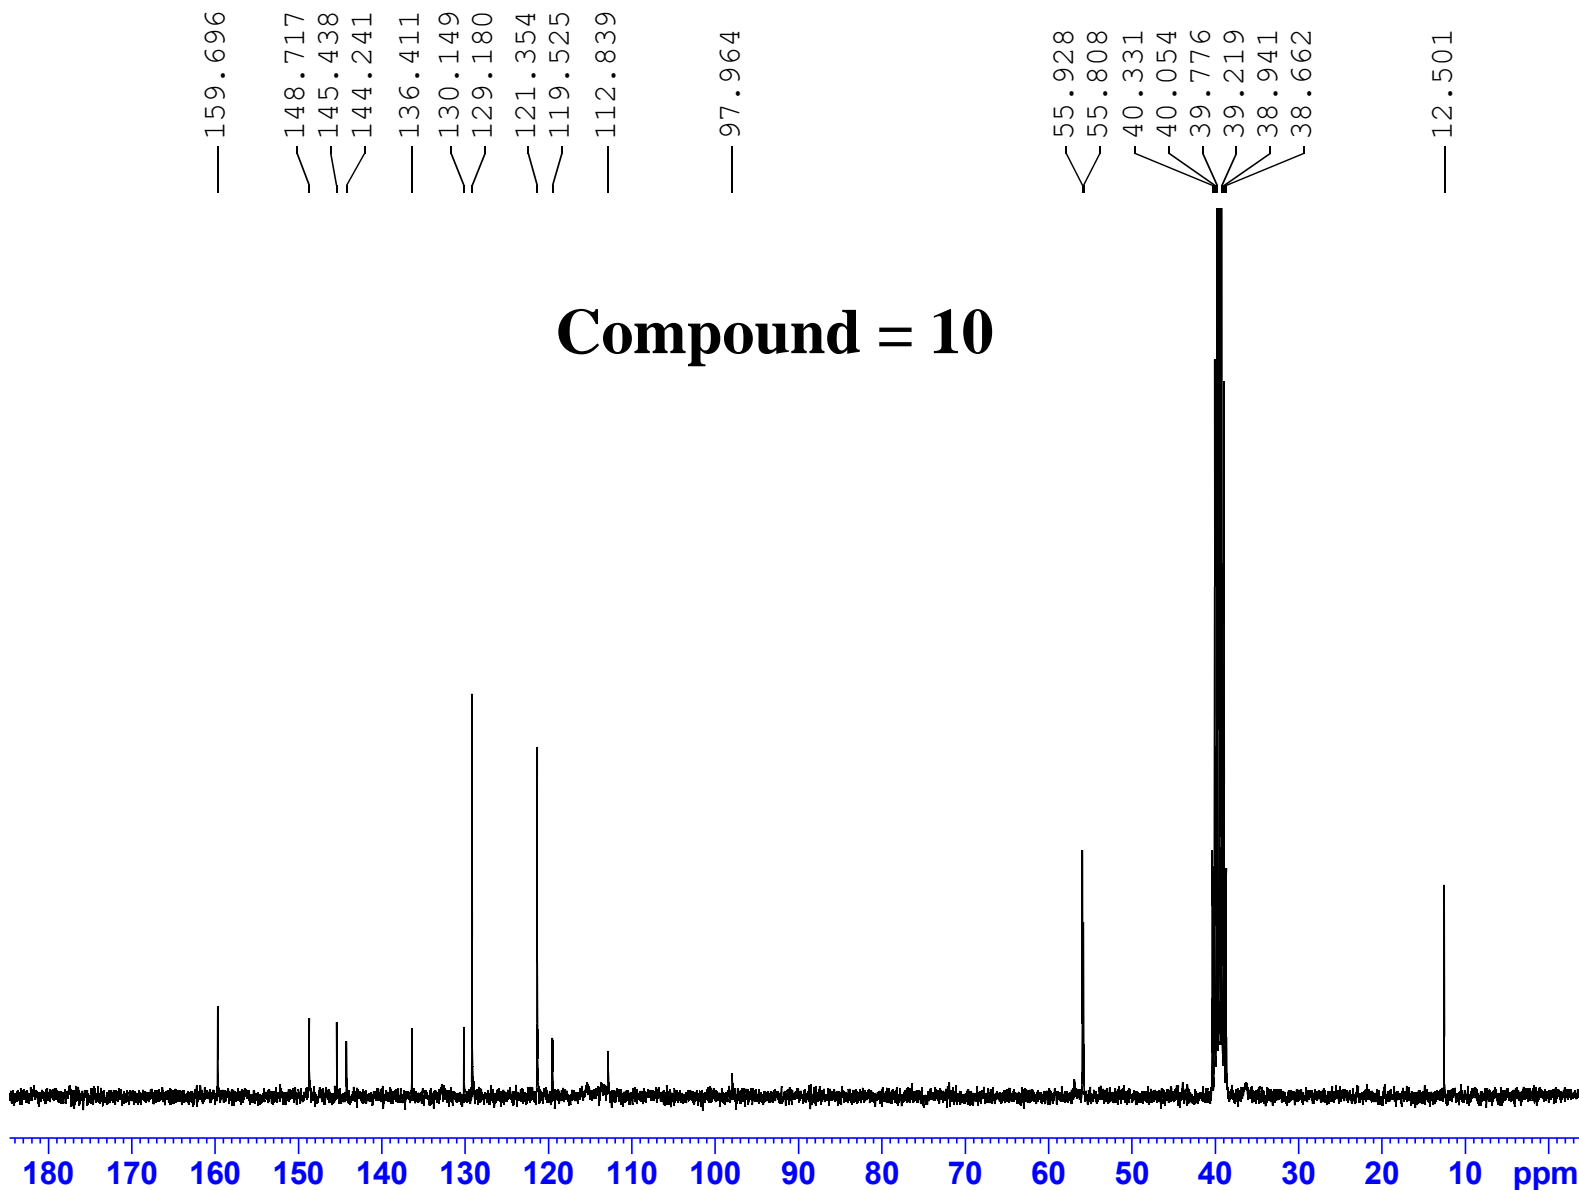

Current Data Parameters  
NAME July12-22  
EXPNO 1  
PROCNO 1

F2 - Acquisition Parameters  
Date\_ 20220713  
Time\_ 5.46 h  
INSTRUM Avance Neo 300  
PROBHD Z8284\_0948 (PH)  
PULPROG zgpg  
TD 32768  
SOLVENT DMSO  
NS 20480  
DS 8  
SWH 17857.143 Hz  
FIDRES 1.089913 Hz  
AQ 0.9175040 sec  
RG 12.5649  
DW 28.000 usec  
DE 12.00 usec  
TE 300.0 K  
D1 2.00000000 sec  
D11 0.03000000 sec  
TD0 20  
SFO1 75.4764278 MHz  
NUC1 13C  
P1 10.00 usec  
PLW1 53.07400131 W  
SFO2 300.1312005 MHz  
NUC2 1H  
CPDPRG[2] waltz65  
PCPD2 90.00 usec  
PLW2 8.72920036 W  
PLW12 0.24247999 W  
PLW13 0.12196000 W

F2 - Processing parameters  
SI 16384  
SF 75.4677858 MHz  
WDW EM  
SSB 0  
LB 1.00 Hz  
GB 0  
PC 1.00

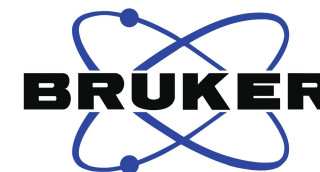

Current Data Parameters  
NAME jul03-22  
EXPNO 1  
PROCNO 1

F2 - Acquisition Parameters  
Date\_ 20220704  
Time 2.47 h  
INSTRUM AVNeo 500  
PROBHD Z8281\_0183 (TX)  
PULPROG zgpg  
TD 32768  
SOLVENT DMSO  
NS 16384  
DS 4  
SWH 30120.482 Hz  
FIDRES 1.838408 Hz  
AQ 0.5439488 sec  
RG 101  
DW 16.600 usec  
DE 12.00 usec  
TE 298.0 K  
D1 2.00000000 sec  
D11 0.03000000 sec  
TD0 16  
SFO1 125.7973986 MHz  
NUC1 13C  
P1 12.00 usec  
PLW1 229.03999329 W  
SFO2 500.2320009 MHz  
NUC2 1H  
CPDPRG[2] waltz65  
PCPD2 80.00 usec  
PLW2 18.45899963 W  
PLW12 0.18459000 W  
PLW13 0.09284900 W

F2 - Processing parameters  
SI 16384  
SF 125.7829947 MHz  
WDW EM  
SSB 0  
LB 1.00 Hz  
GB 0  
PC 1.40

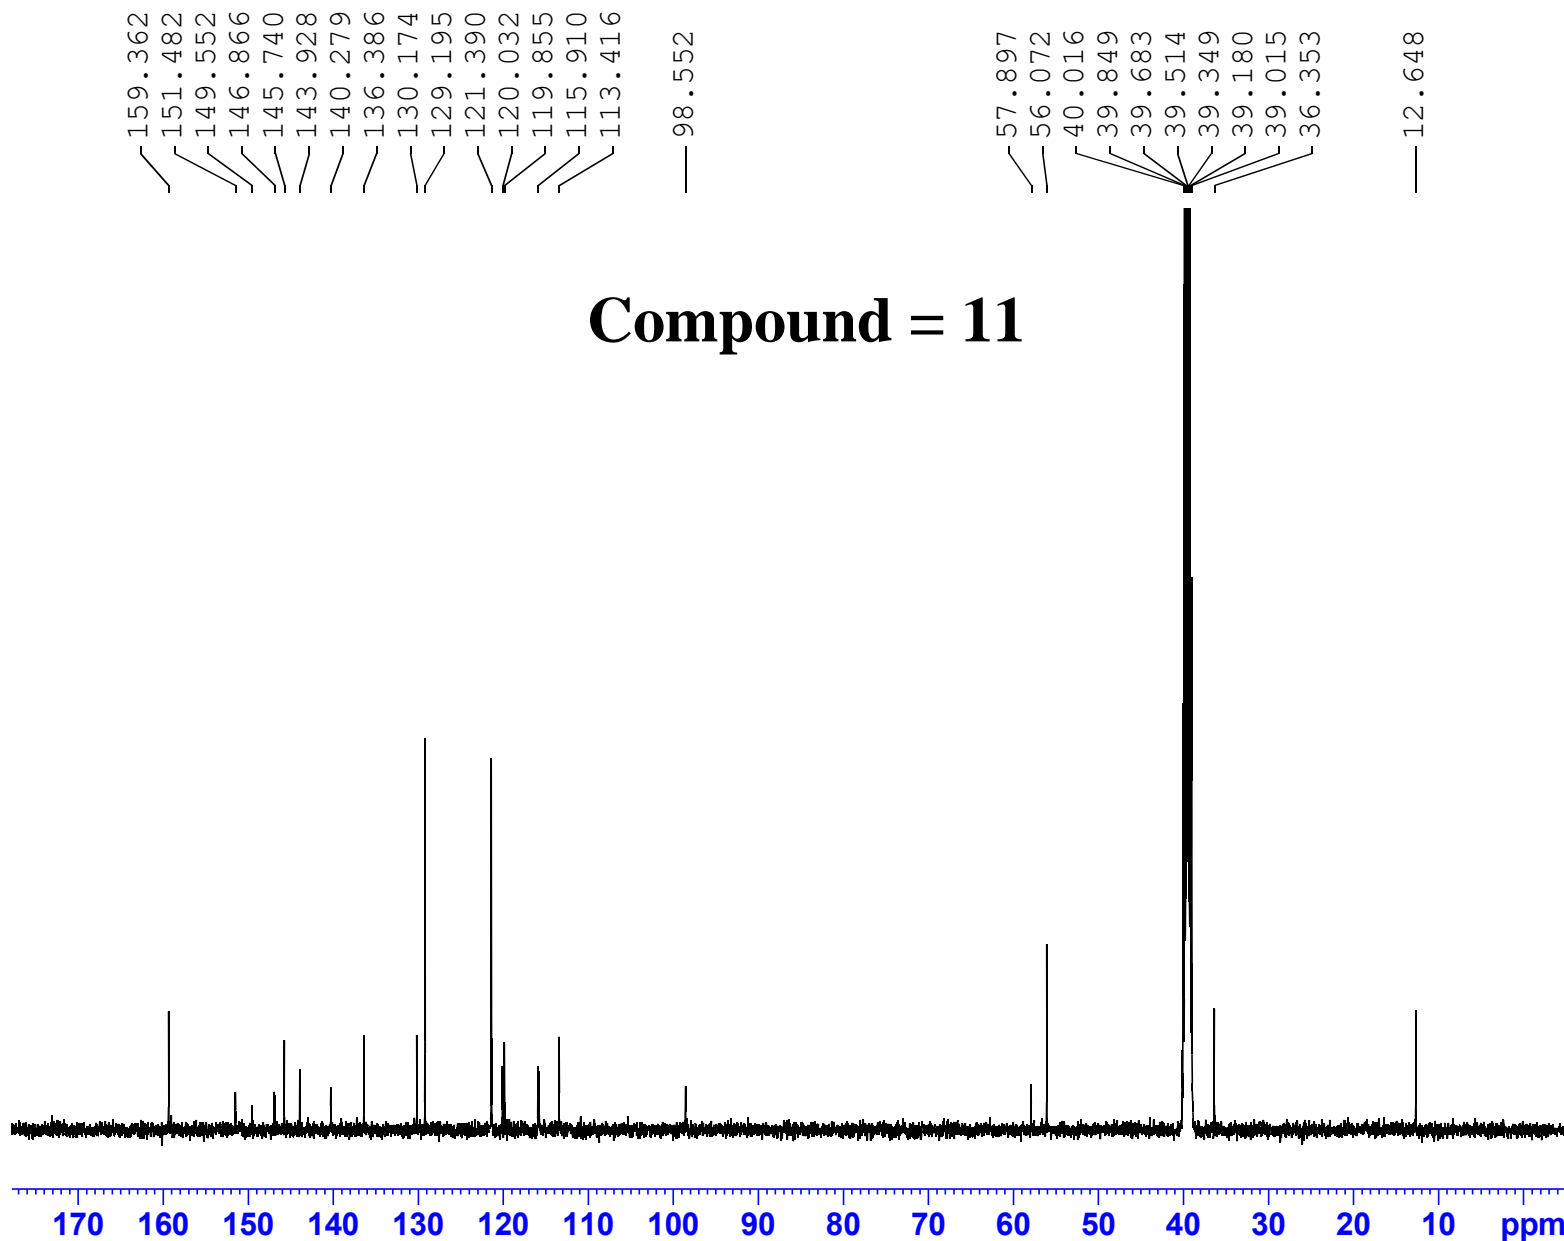

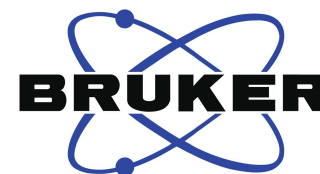

Current Data Parameters  
NAME July01-22  
EXPNO 2  
PROCNO 1

F2 - Acquisition Parameters  
Date\_ 20220702  
Time\_ 2.01 h  
INSTRUM Avance Neo 500  
PROBHD Z8107\_0198 (PH  
PULPROG zgpg  
TD 32768  
SOLVENT DMSO  
NS 20480  
DS 8  
SWH 30120.482 Hz  
FIDRES 1.838408 Hz  
AQ 0.5439488 sec  
RG 101  
DW 16.600 usec  
DE 6.50 usec  
TE 298.0 K  
D1 2.00000000 sec  
D11 0.03000000 sec  
TD0 20  
SFO1 125.8206594 MHz  
NUC1 13C  
P1 16.00 usec  
PLW1 145.00000000 W  
SFO2 500.3320013 MHz  
NUC2 1H  
CPDPRG[2] waltz65  
PCPD2 80.00 usec  
PLW2 10.00000000 W  
PLW12 0.14854001 W  
PLW13 0.07471200 W

F2 - Processing parameters  
SI 16384  
SF 125.8081414 MHz  
WDW EM  
SSB 0  
LB 1.00 Hz  
GB 0  
PC 1.40

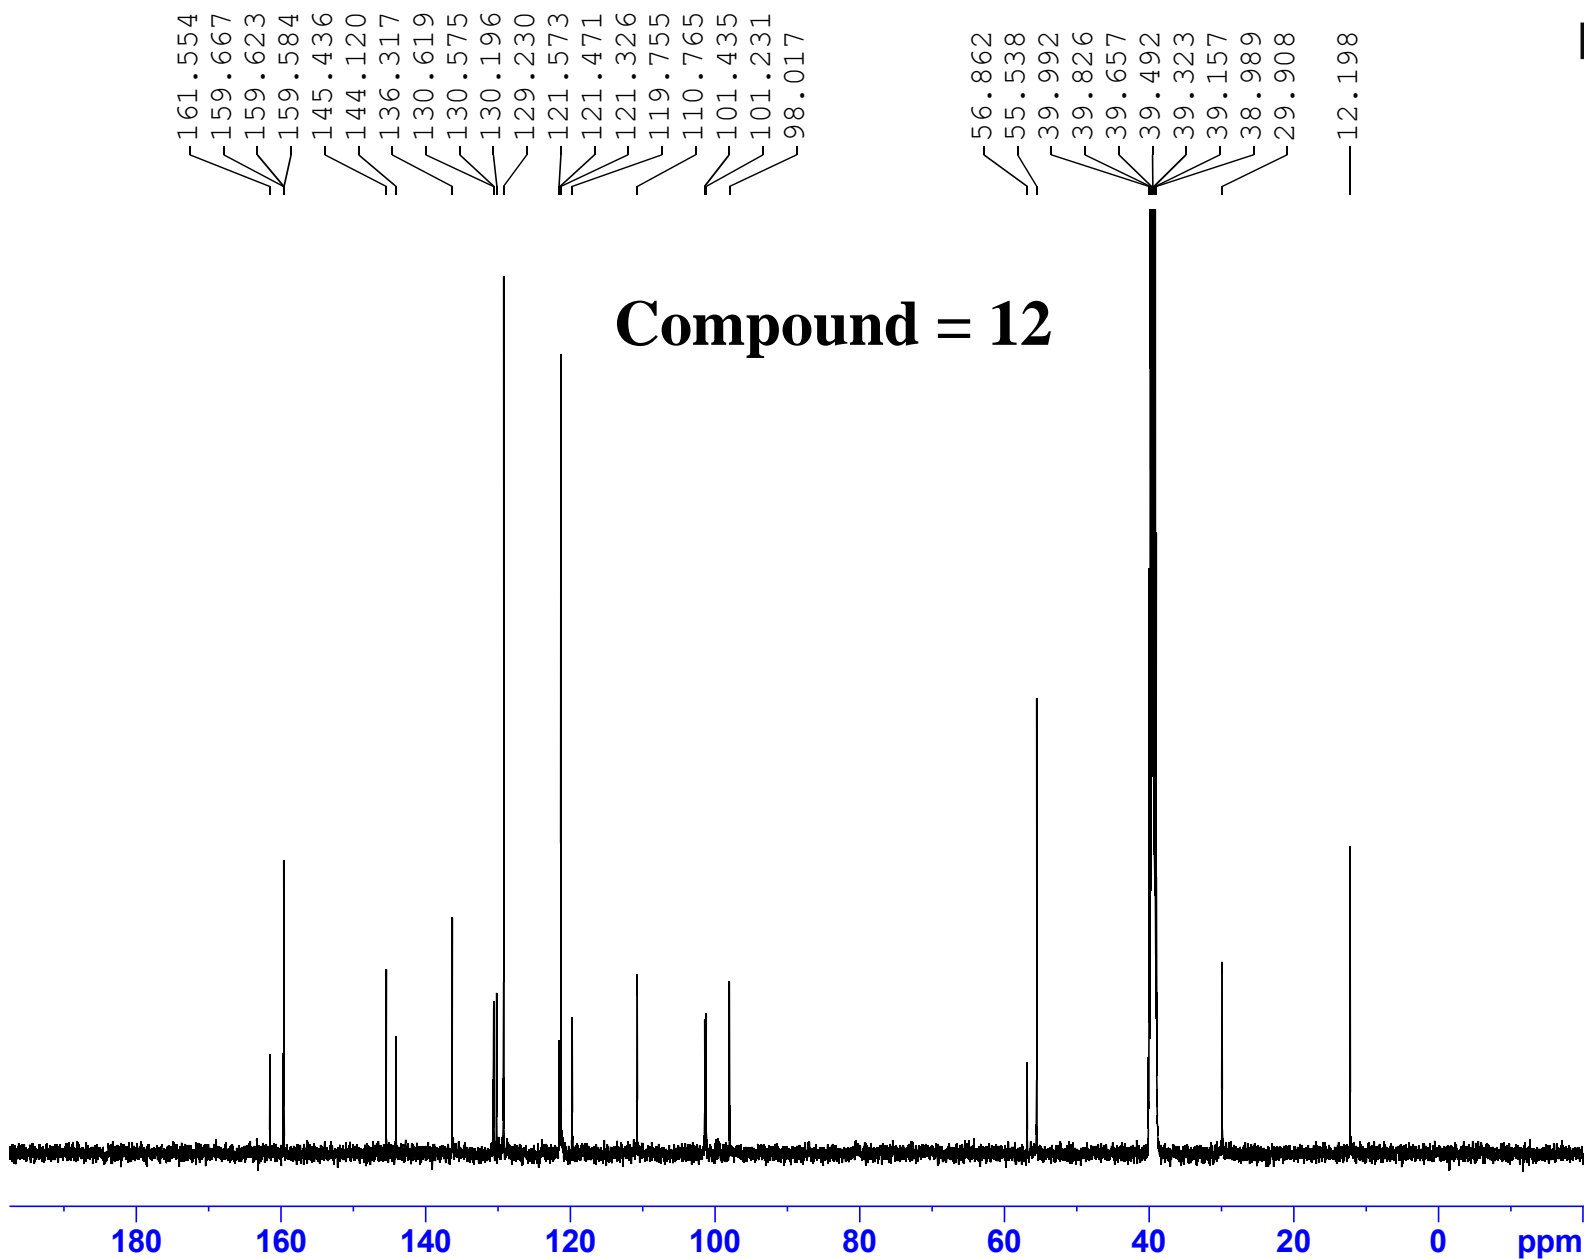

SHEHRYAR HAMEED / Dr.Khalid / BO-II-157 / DMSO  
BB

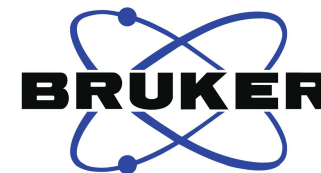

Current Data Parameters  
NAME BO-II-157  
EXPNO 2  
PROCNO 1

F2 - Acquisition Parameters  
Date\_ 20220629  
Time 2.14 h  
INSTRUM Avance Neo 300  
PROBHD Z8284\_0948 (PH  
PULPROG zgpg  
TD 32768  
SOLVENT DMSO  
NS 16384  
DS 8  
SWH 17857.143 Hz  
FIDRES 1.089913 Hz  
AQ 0.9175040 sec  
RG 5.09511  
DW 28.000 usec  
DE 12.00 usec  
TE 300.0 K  
D1 1.50000000 sec  
D11 0.03000000 sec  
TD0 16  
SFO1 75.4764278 MHz  
NUC1 13C  
P1 10.00 usec  
PLW1 53.07400131 W  
SFO2 300.1312005 MHz  
NUC2 1H  
CPDPRG[2] waltz65  
PCPD2 90.00 usec  
PLW2 8.72920036 W  
PLW12 0.24247999 W  
PLW13 0.12196000 W

F2 - Processing parameters  
SI 16384  
SF 75.4677870 MHz  
WDW EM  
SSB 0  
LB 1.00 Hz  
GB 0  
PC 1.00

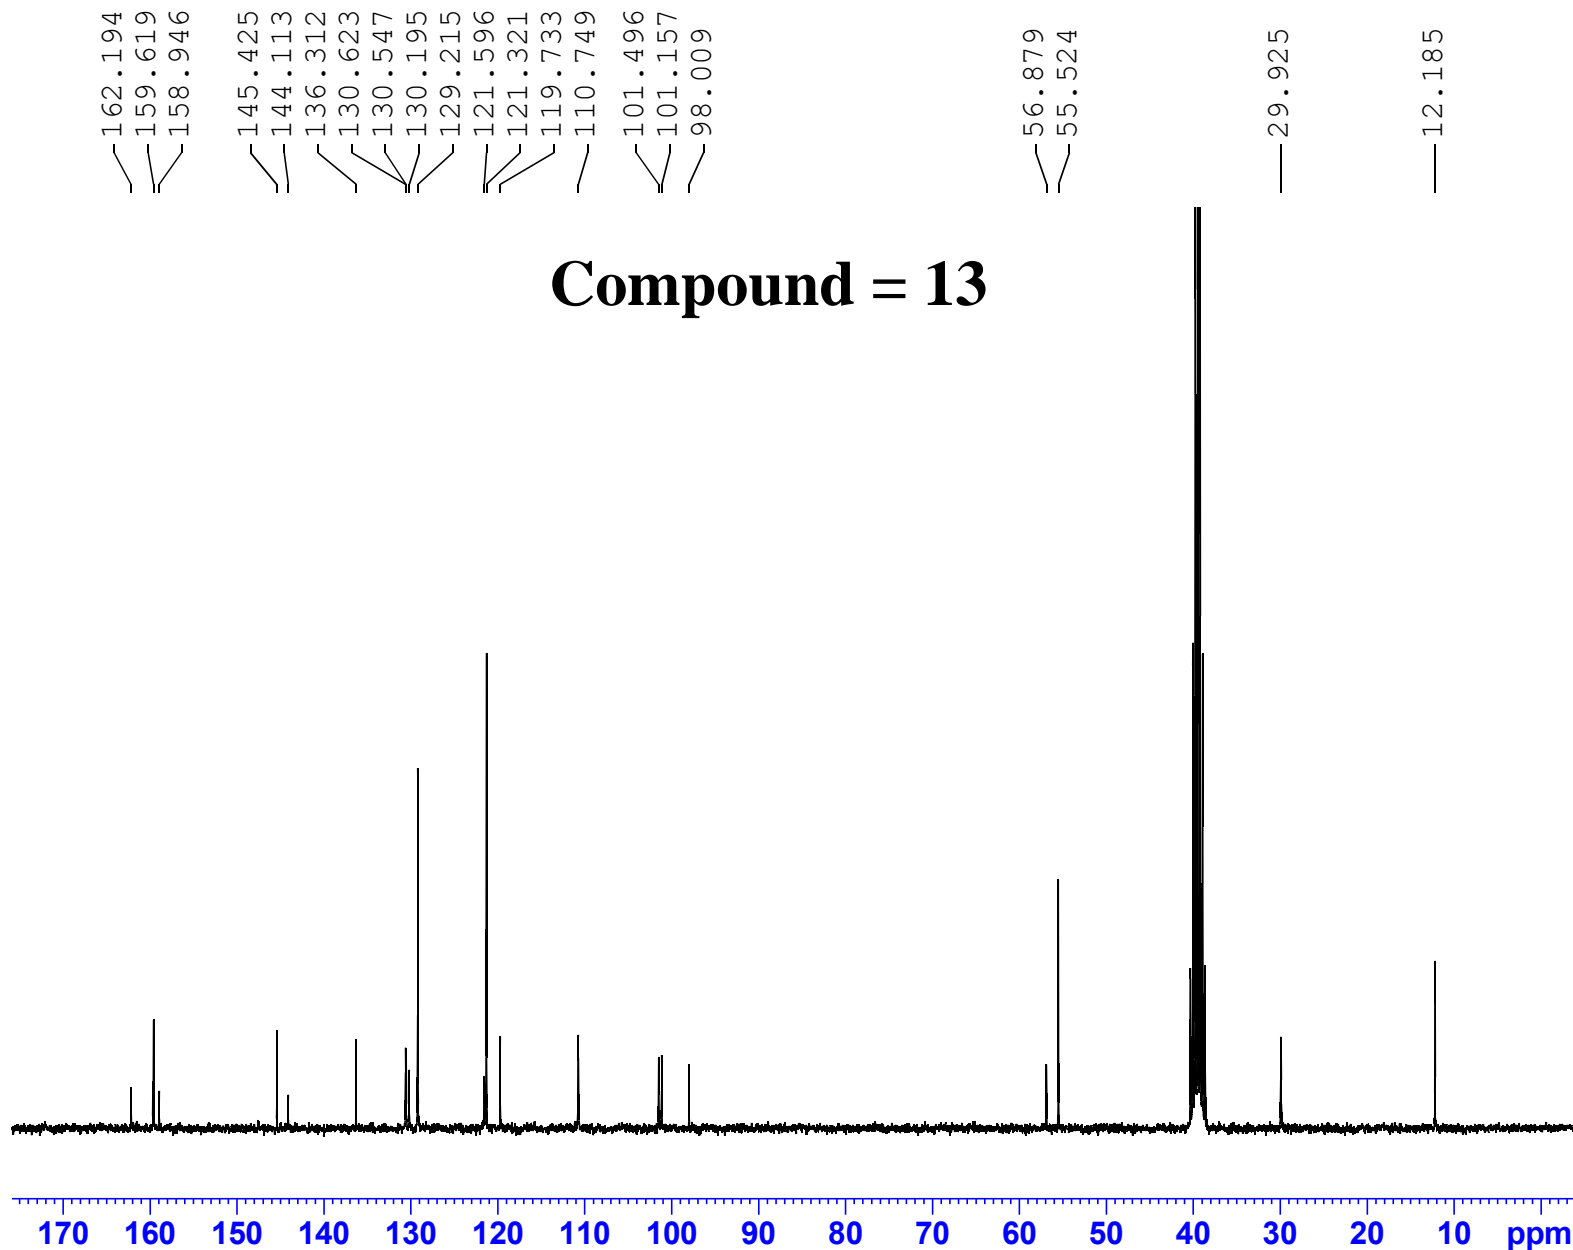

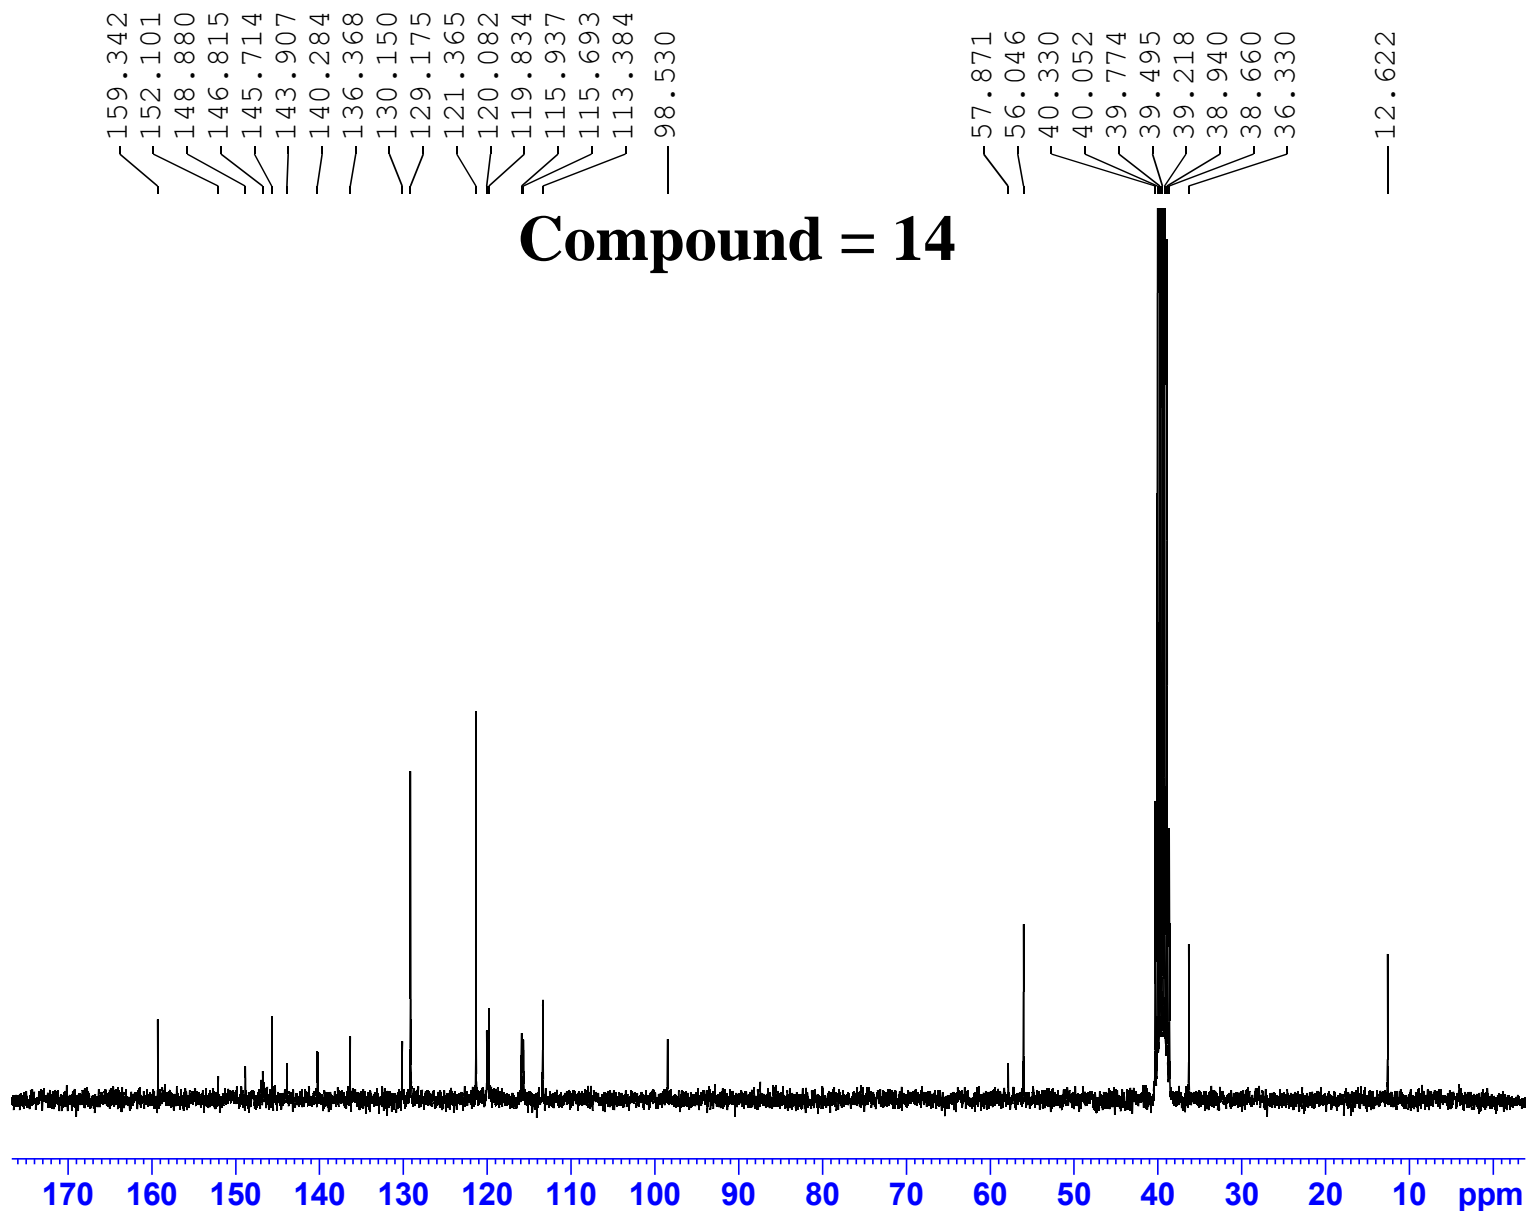

Current Data Parameters  
NAME July15-22  
EXPNO 2  
PROCNO 1

F2 - Acquisition Parameters  
Date\_ 20220716  
Time\_ 4.53 h  
INSTRUM Avance Neo 300  
PROBHD Z8284\_0948 (PH  
PULPROG zgpg  
TD 32768  
SOLVENT DMSO  
NS 20480  
DS 8  
SWH 17857.143 Hz  
FIDRES 1.089913 Hz  
AQ 0.9175040 sec  
RG 12.5649  
DW 28.000 usec  
DE 12.00 usec  
TE 300.0 K  
D1 2.00000000 sec  
D11 0.03000000 sec  
TD0 20  
SFO1 75.4764278 MHz  
NUC1 13C  
P1 10.00 usec  
PLW1 53.07400131 W  
SFO2 300.1312005 MHz  
NUC2 1H  
CPDPRG[2] waltz65  
PCPD2 90.00 usec  
PLW2 8.72920036 W  
PLW12 0.24247999 W  
PLW13 0.12196000 W

F2 - Processing parameters  
SI 16384  
SF 75.4677869 MHz  
WDW EM  
SSB 0  
LB 1.00 Hz  
GB 0  
PC 1.00

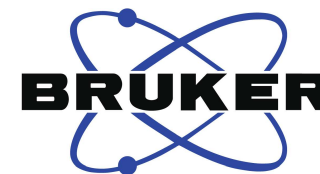

Current Data Parameters  
NAME July18-22  
EXPNO 2  
PROCNO 1

F2 - Acquisition Parameters  
Date\_ 20220719  
Time\_ 5.55 h  
INSTRUM Avance Neo 300  
PROBHD z8284\_0948 (PH  
PULPROG zgpg  
TD 32768  
SOLVENT DMSO  
NS 18432  
DS 8  
SWH 17857.143 Hz  
FIDRES 1.089913 Hz  
AQ 0.9175040 sec  
RG 12.5649  
DW 28.000 usec  
DE 12.00 usec  
TE 300.0 K  
D1 2.00000000 sec  
D11 0.03000000 sec  
TD0 18  
SF01 75.4764278 MHz  
NUC1 13C  
P1 10.00 usec  
PLW1 53.07400131 W  
SF02 300.1312005 MHz  
NUC2 1H  
CPDPRG[2] waltz65  
PCPD2 90.00 usec  
PLW2 8.72920036 W  
PLW12 0.24247999 W  
PLW13 0.12196000 W

F2 - Processing parameters  
SI 16384  
SF 75.4677869 MHz  
WDW EM  
SSB 0  
LB 1.00 Hz  
GB 0  
PC 1.00

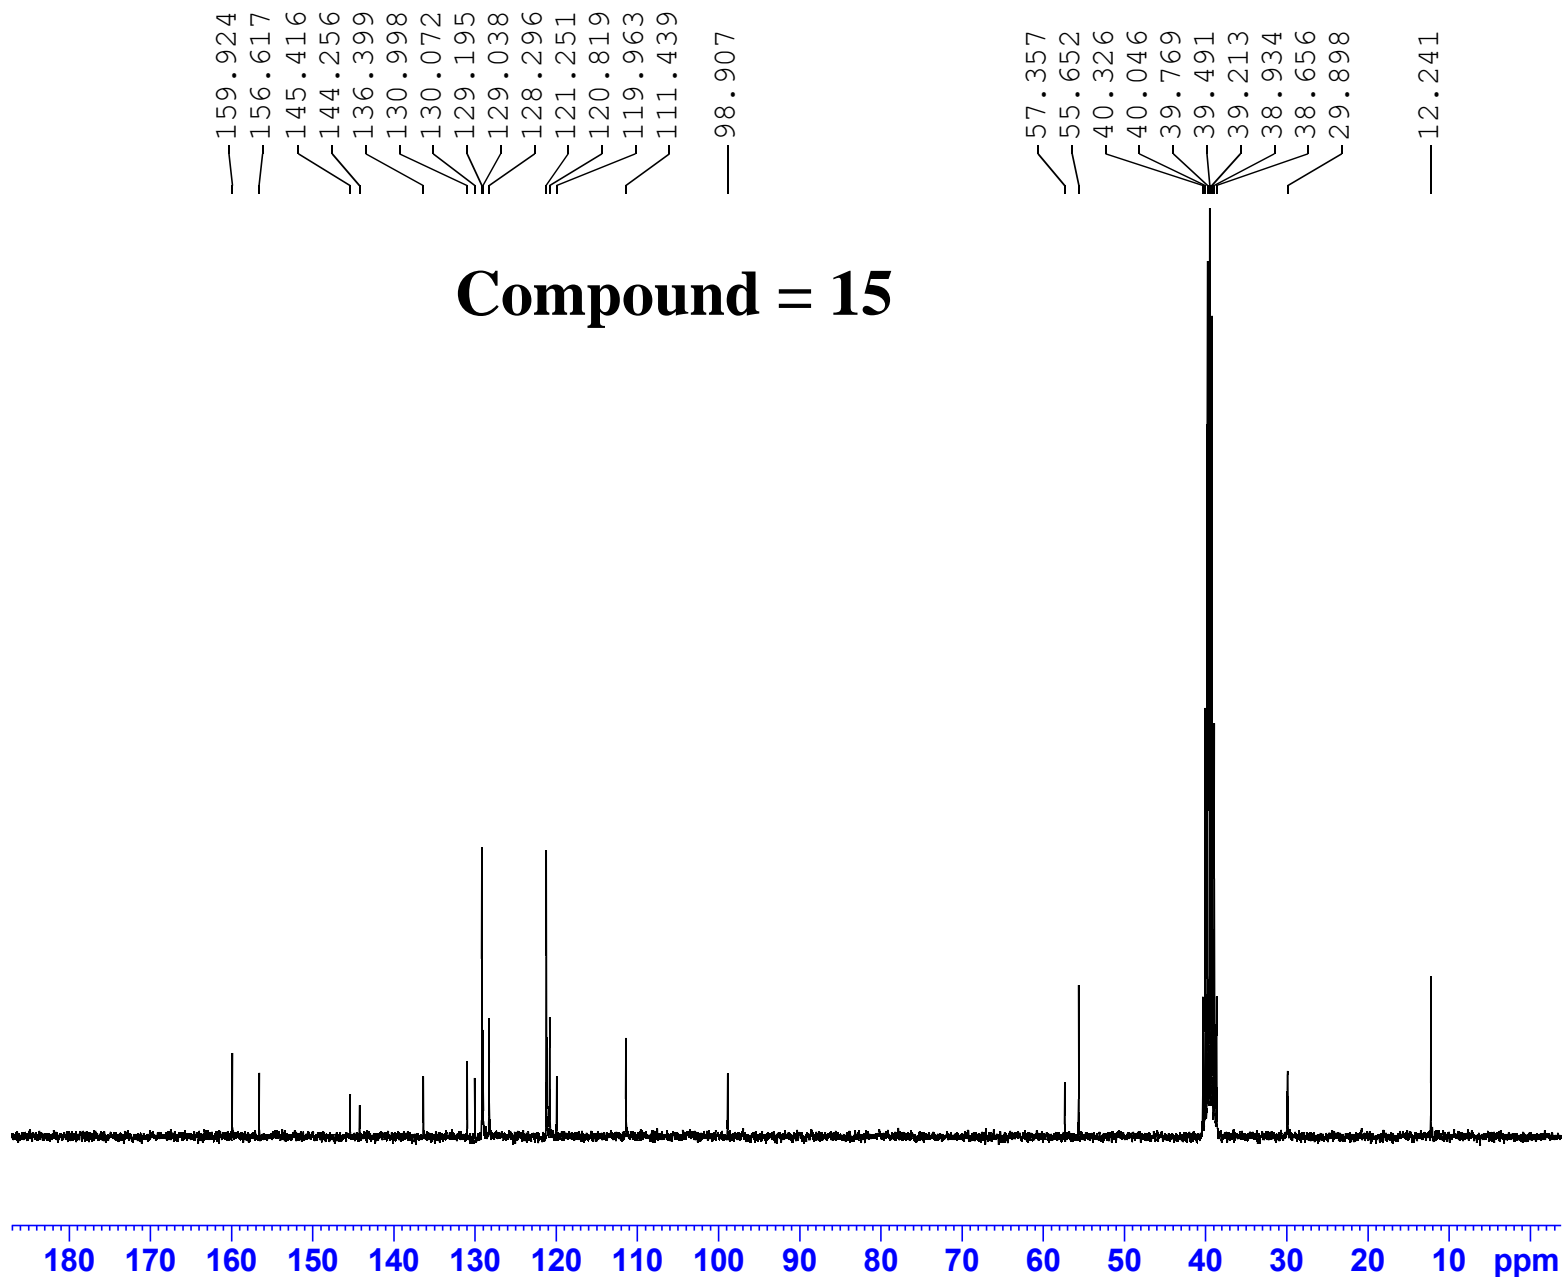

SHEHRYAR / DR.KHALID / BO.I.181 / DMSO  
BB

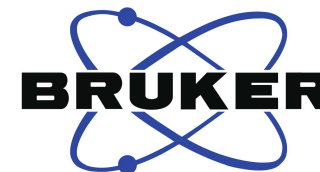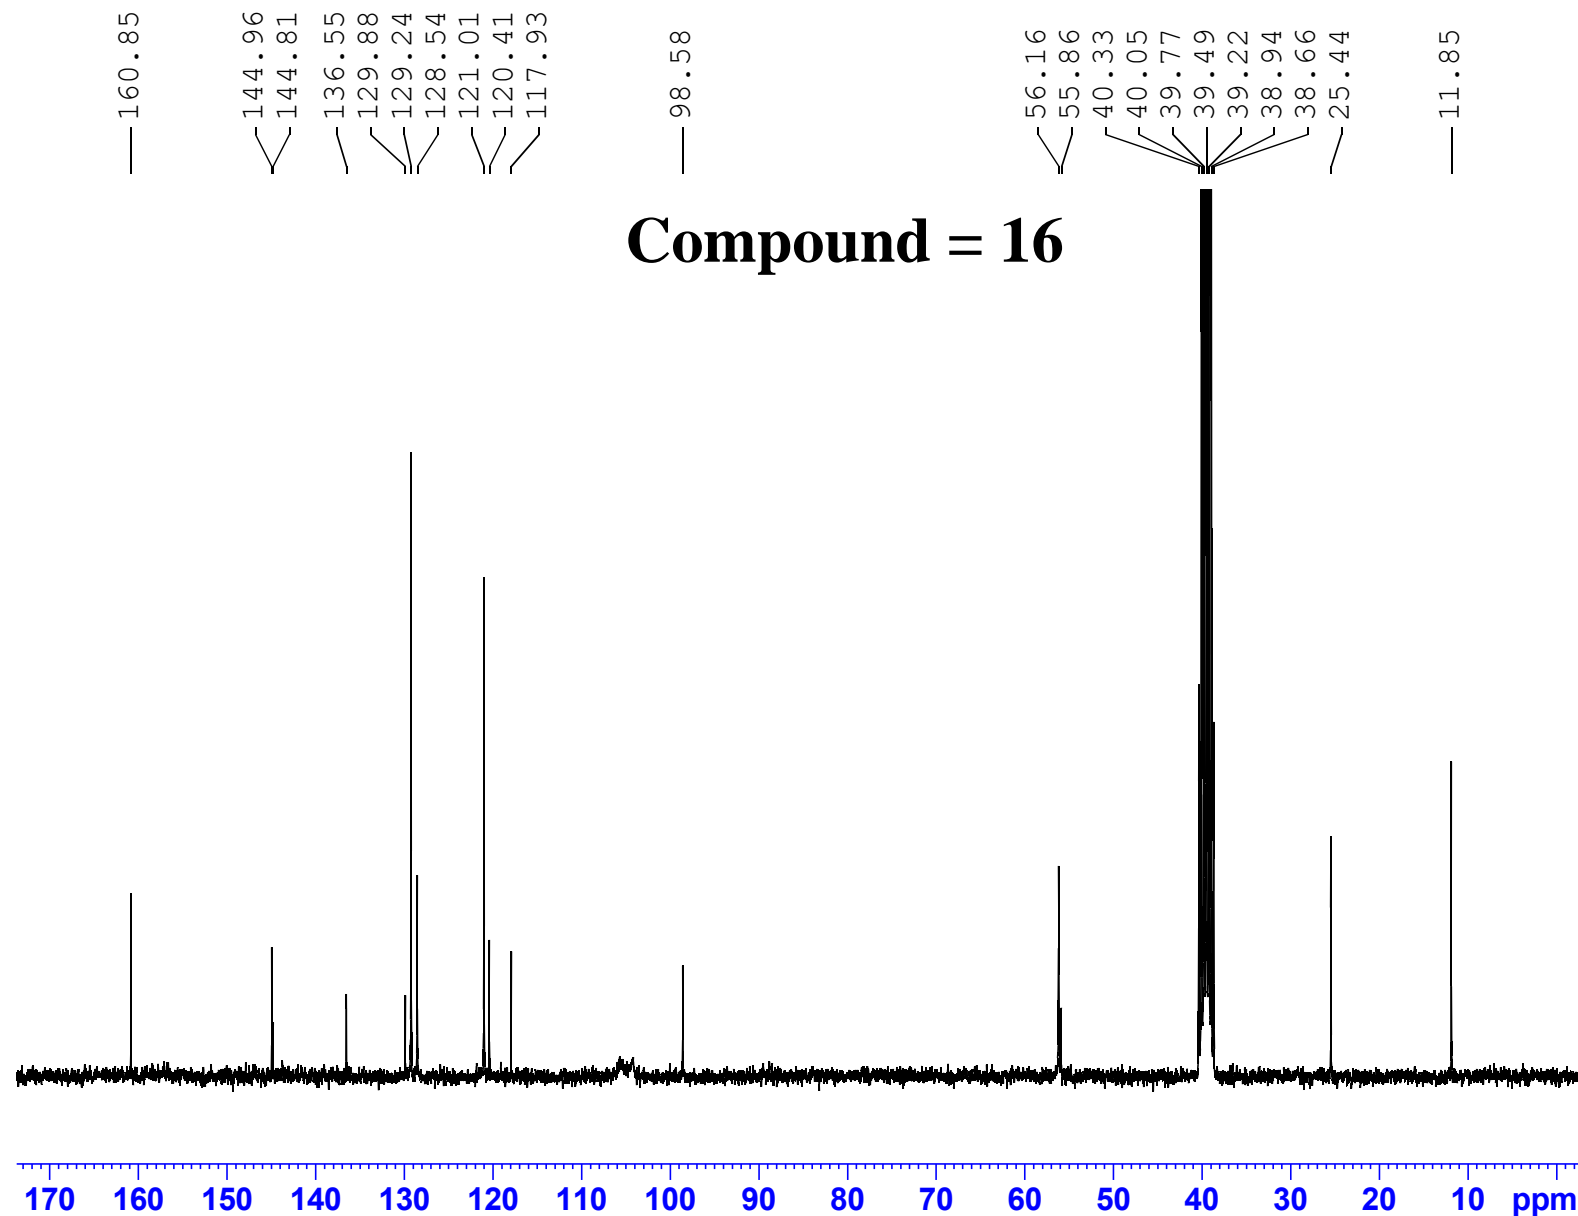

Current Data Parameters  
NAME July05-22  
EXPNO 2  
PROCNO 1

F2 - Acquisition Parameters  
Date\_ 20220706  
Time\_ 4.36 h  
INSTRUM Avance Neo 300  
PROBHD Z8284\_0948 (PH  
PULPROG zgpg  
TD 32768  
SOLVENT DMSO  
NS 20480  
DS 8  
SWH 17857.143 Hz  
FIDRES 1.089913 Hz  
AQ 0.9175040 sec  
RG 5.09511  
DW 28.000 usec  
DE 12.00 usec  
TE 300.0 K  
D1 2.00000000 sec  
D11 0.03000000 sec  
TD0 20  
SFO1 75.4764278 MHz  
NUC1 13C  
P1 10.00 usec  
PLW1 53.07400131 W  
SFO2 300.1312005 MHz  
NUC2 1H  
CPDPRG[2] waltz65  
PCPD2 90.00 usec  
PLW2 8.72920036 W  
PLW12 0.24247999 W  
PLW13 0.12196000 W

F2 - Processing parameters  
SI 16384  
SF 75.4677870 MHz  
WDW EM  
SSB 0  
LB 1.00 Hz  
GB 0  
PC 1.00



SHEHRYAR / DR.KHALID / BO.I.159 / DMSO  
BB

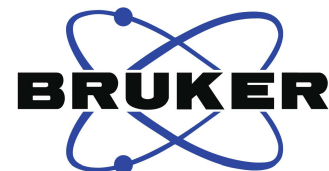

Current Data Parameters  
NAME July23-22  
EXPNO 2  
PROCNO 1

F2 - Acquisition Parameters  
Date\_ 20220724  
Time 10.30 h  
INSTRUM Avance Neo 300  
PROBHD Z8284\_0948 (PH  
PULPROG zgpg  
TD 32768  
SOLVENT DMSO  
NS 24576  
DS 8  
SWH 17857.143 Hz  
FIDRES 1.089913 Hz  
AQ 0.9175040 sec  
RG 12.5649  
DW 28.000 usec  
DE 12.00 usec  
TE 300.0 K  
D1 2.00000000 sec  
D11 0.03000000 sec  
TD0 24  
SFO1 75.4764278 MHz  
NUC1 13C  
P1 10.00 usec  
PLW1 53.07400131 W  
SFO2 300.1312005 MHz  
NUC2 1H  
CPDPRG[2] waltz65  
PCPD2 90.00 usec  
PLW2 8.72920036 W  
PLW12 0.24247999 W  
PLW13 0.12196000 W

F2 - Processing parameters  
SI 16384  
SF 75.4677859 MHz  
WDW EM  
SSB 0  
LB 1.00 Hz  
GB 0  
PC 1.00

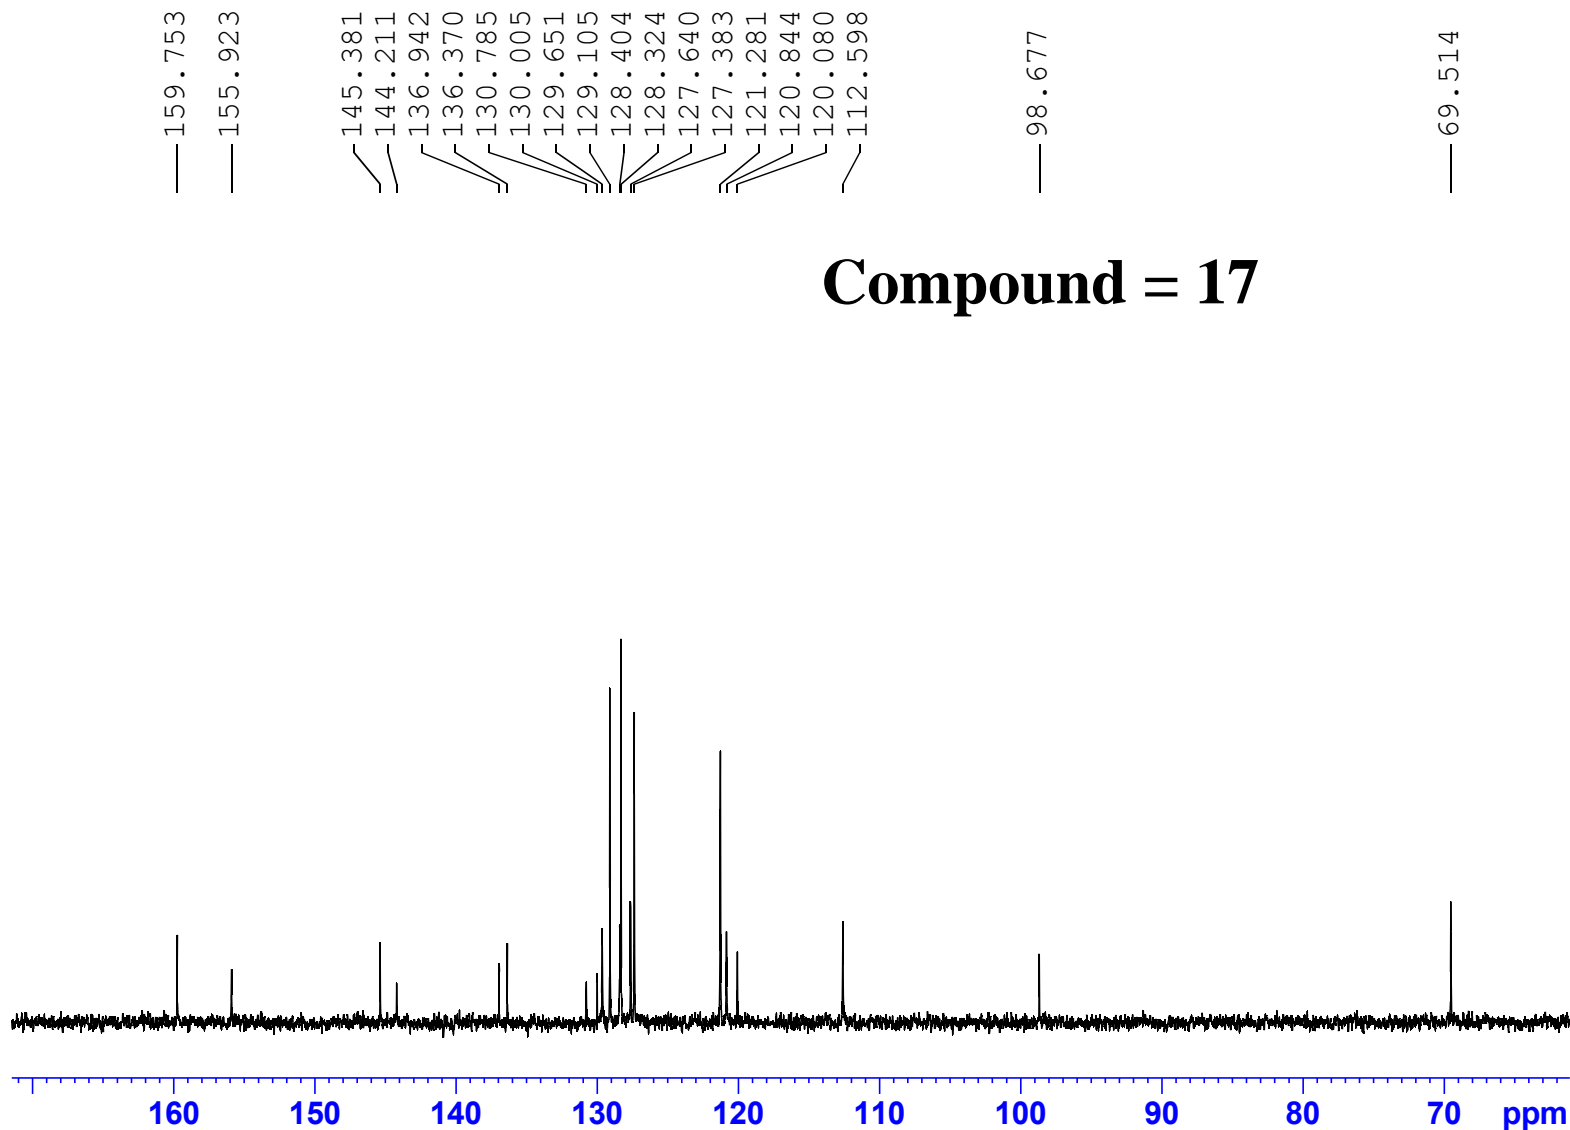

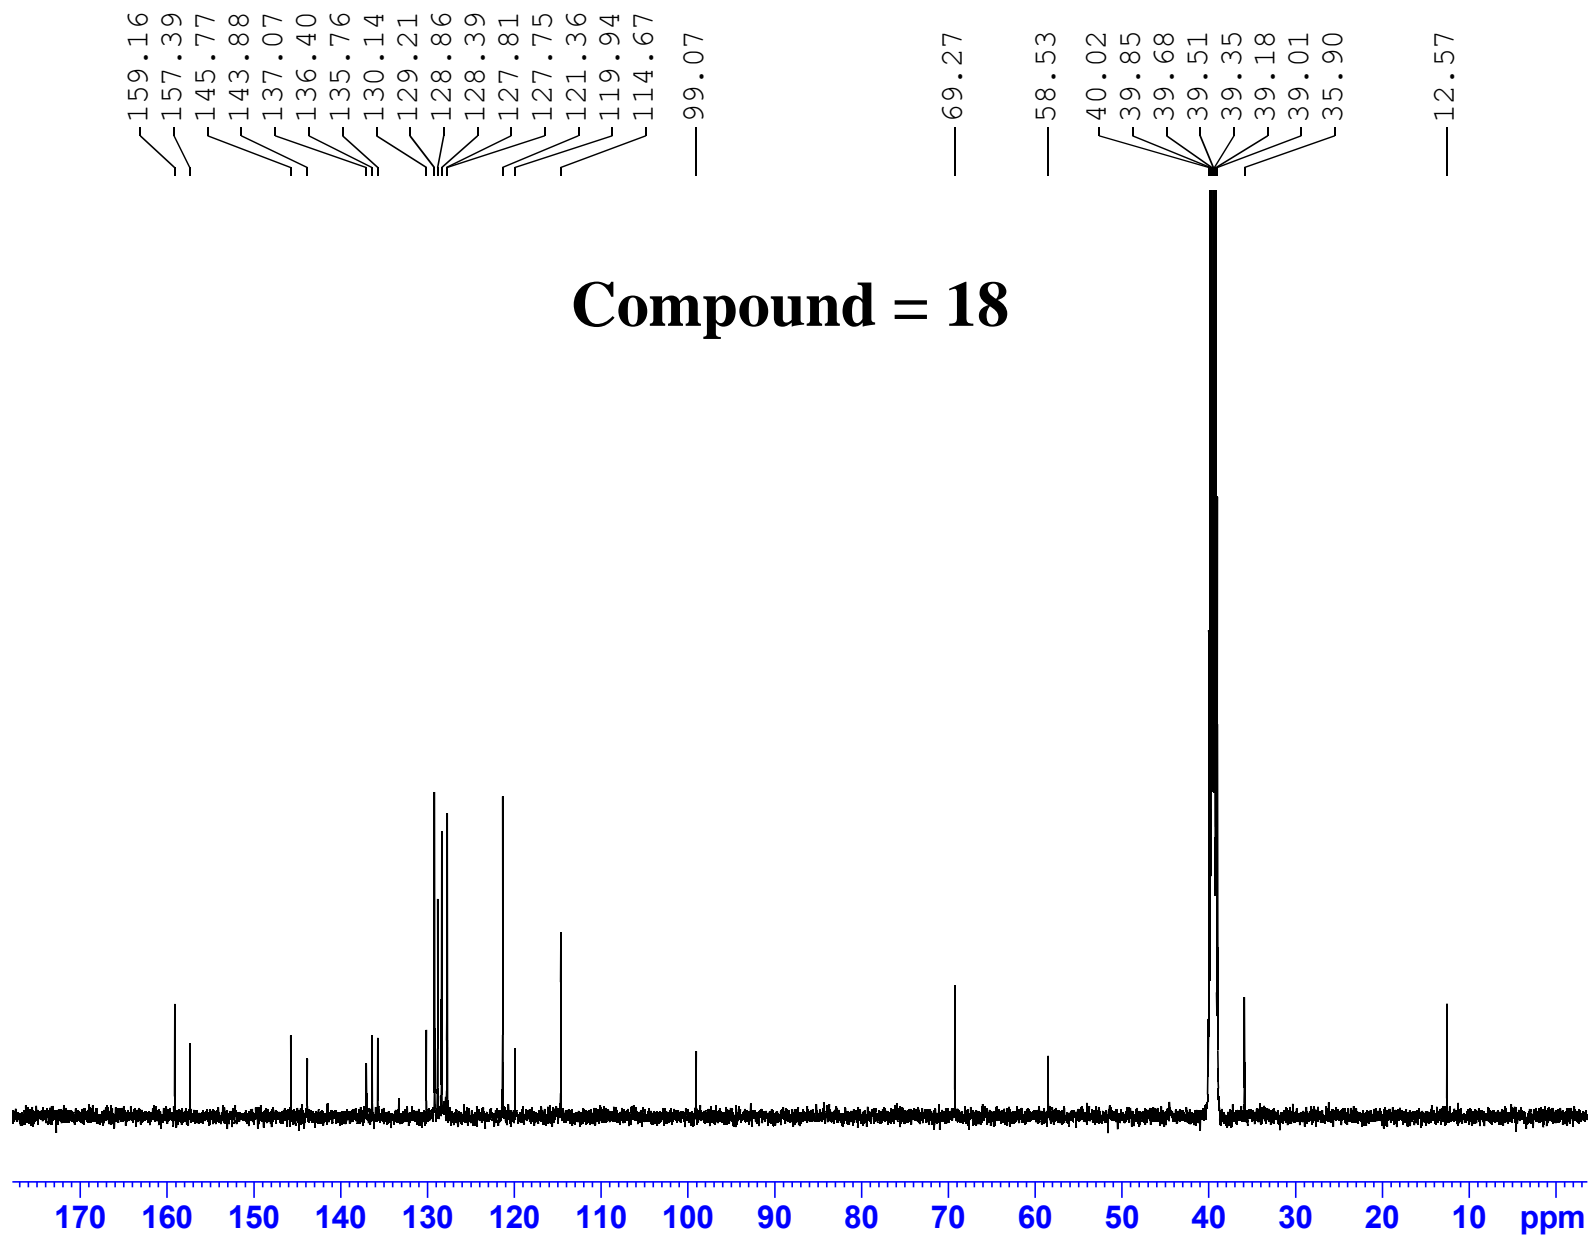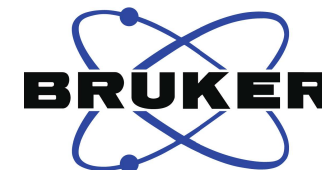

Current Data Parameters  
NAME jul14-22  
EXPNO 3  
PROCNO 1

F2 - Acquisition Parameters  
Date\_ 20220715  
Time\_ 5.20 h  
INSTRUM AVNeo\_500  
PROBHD Z8281\_0183 (TX  
PULPROG zgpg  
TD 32768  
SOLVENT DMSO  
NS 18432  
DS 4  
SWH 30120.482 Hz  
FIDRES 1.838408 Hz  
AQ 0.5439488 sec  
RG 101  
DW 16.600 usec  
DE 12.00 usec  
TE 298.0 K  
D1 2.00000000 sec  
D11 0.03000000 sec  
TD0 18  
SF01 125.7973986 MHz  
NUC1 13C  
P1 12.00 usec  
PLW1 229.03999329 W  
SF02 500.2320009 MHz  
NUC2 1H  
CPDPRG[2] waltz65  
PCPD2 80.00 usec  
PLW2 18.45899963 W  
PLW12 0.18459000 W  
PLW13 0.09284900 W

F2 - Processing parameters  
SI 16384  
SF 125.7829949 MHz  
WDW EM  
SSB 0  
LB 1.00 Hz  
GB 0  
PC 1.40

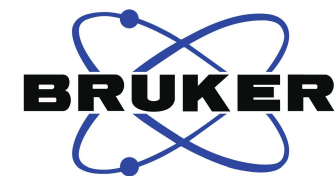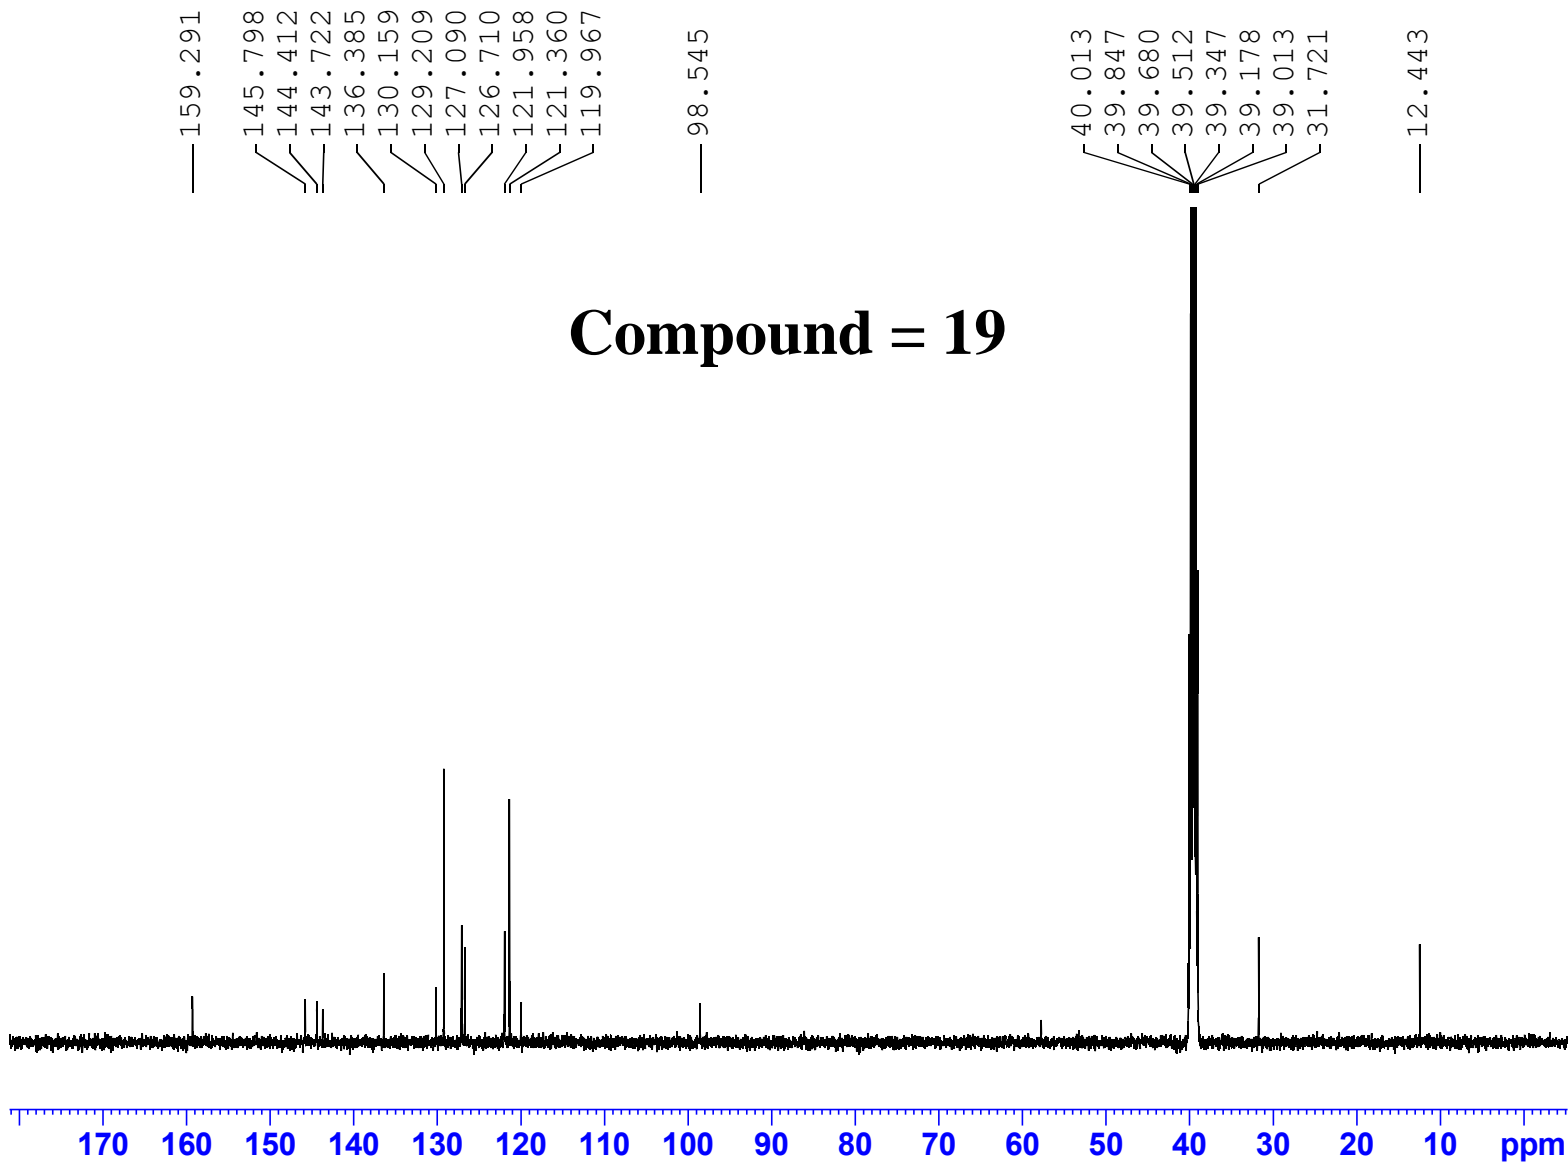

Current Data Parameters  
NAME jul15-22  
EXPNO 3  
PROCNO 1

F2 - Acquisition Parameters  
Date\_ 20220716  
Time\_ 1.27 h  
INSTRUM AVNeo 500  
PROBHD z8281\_0183 (TX)  
PULPROG zgpg  
TD 32768  
SOLVENT DMSO  
NS 18432  
DS 4  
SWH 30120.482 Hz  
FIDRES 1.838408 Hz  
AQ 0.5439488 sec  
RG 101  
DW 16.600 usec  
DE 12.00 usec  
TE 298.0 K  
D1 2.00000000 sec  
D11 0.03000000 sec  
TD0 18  
SFO1 125.7973986 MHz  
NUC1 13C  
P1 12.00 usec  
PLW1 229.0399329 W  
SFO2 500.2320009 MHz  
NUC2 1H  
CPDPRG[2] waltz65  
PCPD2 80.00 usec  
PLW2 18.45899963 W  
PLW12 0.18459000 W  
PLW13 0.09284900 W

F2 - Processing parameters  
SI 16384  
SF 125.7829949 MHz  
WDW EM  
SSB 0  
LB 1.00 Hz  
GB 0  
PC 1.40

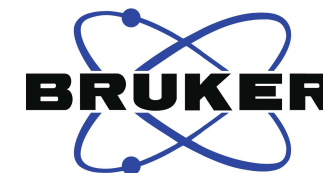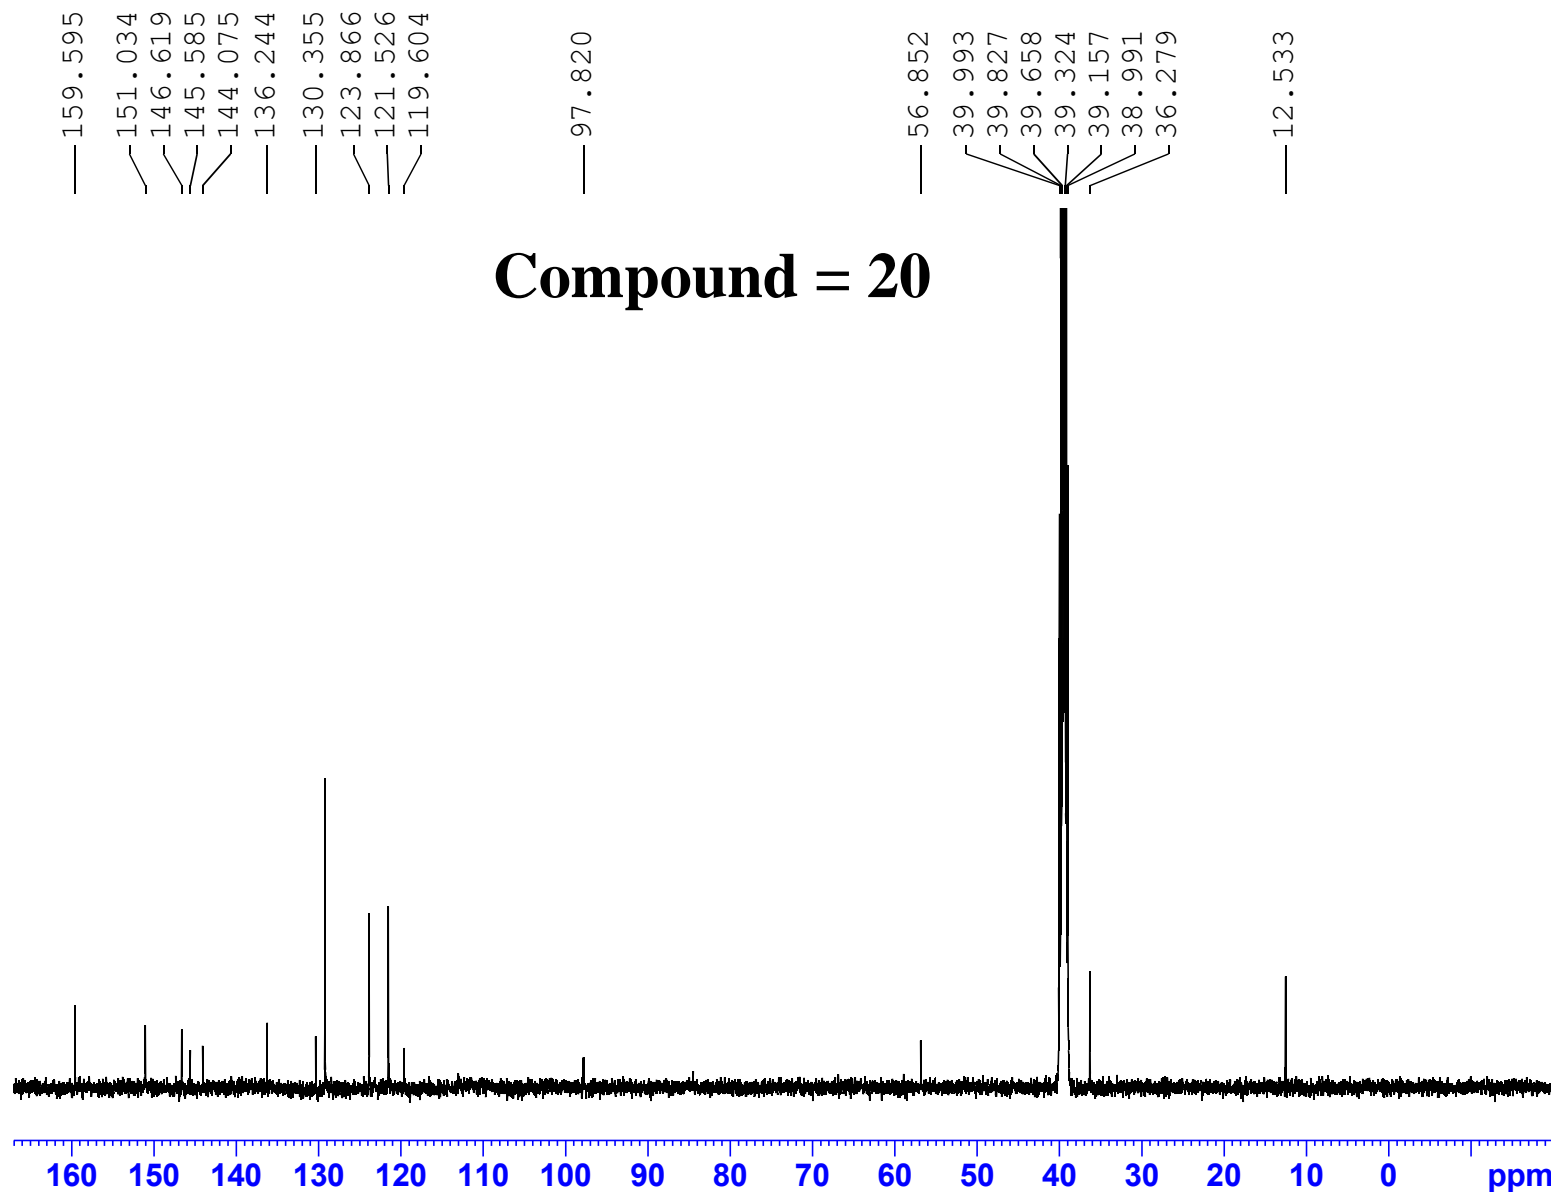

Current Data Parameters  
NAME July19-22  
EXPNO 100  
PROCNO 1

F2 - Acquisition Parameters  
Date\_ 20220720  
Time 9.10 h  
INSTRUM Avance Neo 500  
PROBHD Z8107\_0198 (PH  
PULPROG zgpg  
TD 32632  
SOLVENT DMSO  
NS 24000  
DS 8  
SWH 30120.482 Hz  
FIDRES 1.846070 Hz  
AQ 0.5416912 sec  
RG 101  
DW 16.600 usec  
DE 6.50 usec  
TE 298.0 K  
D1 2.00000000 sec  
D11 0.03000000 sec  
TD0 25  
SFO1 125.8206594 MHz  
NUC1 13C  
P1 16.00 usec  
PLW1 145.00000000 W  
SFO2 500.3320013 MHz  
NUC2 1H  
CPDPRG[2] waltzg65  
PCPD2 80.00 usec  
PLW2 10.00000000 W  
PLW12 0.14854001 W  
PLW13 0.07471200 W

F2 - Processing parameters  
SI 16384  
SF 125.8081414 MHz  
WDW EM  
SSB 0  
LB 1.00 Hz  
GB 0  
PC 1.40
